# Supplementary material for: Systematic study of FFF materials for digitalizing chemical reactors with 3D printing: superior performance of carbon-filled polyamide
Source: Royal Society of Chemistry journal article supplement (doi:10.1039/d2re00395c), 2023-01-01
Supplement: d2re00395c1.pdf [file d2re00395c1.pdf]

**Supporting information**  
for the article:

**Systematic study of FFF materials for digitalizing chemical reactors  
with 3D printing: superior performance of carbon-filled polyamide**

Victoria A. Korabelnikova, Evgeniy G. Gordeev, Valentine P. Ananikov\*

## Content

|                                                                             |    |
|-----------------------------------------------------------------------------|----|
| 1. Material selection .....                                                 | 3  |
| 2. Chemical resistance of 3D printed test samples in various solvents ..... | 4  |
| 3. Thermal resistance of FFF parts.....                                     | 24 |
| 4. Tensile testing .....                                                    | 31 |
| 5. Study of the impermeability of the FFF parts .....                       | 40 |
| 6. The study of shrinkage drawback.....                                     | 49 |
| 7. Transfer hydrogenation in FFF batch reactor.....                         | 53 |
| 8. Transfer hydrogenation in FFF flow reactor.....                          | 63 |

## 1. Material selection

**Table S1.** Characteristics of plastics and basic printing parameters.

|                                    |          |             |             |          |             |              |             |
|------------------------------------|----------|-------------|-------------|----------|-------------|--------------|-------------|
| Material                           | PLA+     | TPU         | PC+         | PA6-CF   | PA          | PP-GF        | PP          |
| Manufacturer                       | ESUN     | ESUN        | Raise3D     | ESUN     | ESUN        | FILAMENTARNO | FL33        |
| Color                              | White    | Transparent | Transparent | Black    | Transparent | Black        | Transparent |
| Bar diameter, mm                   | 1.75     | 1.75        | 1.75        | 1.75     | 1.75        | 1.75         | 1.75        |
| Brim presence                      | no       | no          | no          | no       | yes         | no           | yes         |
| Fixation to the platform           | adhesive | adhesive    | paper tape  | adhesive | adhesive    | PP tape      | PP tape     |
| Nozzle temperature, °C             | 230      | 230         | 260         | 275      | 245         | 245          | 240         |
| Table temperature, °C              | 70       | 100         | 100         | 105      | 100         | 60           | 110         |
| Radiator temperature, °C           | 52       | 80          | 90          | 80       | 80          | 80           | 80          |
| Extrusion multiplier *             | 1.00     | 1.00        | 0.98        | 1.01     | 1.00        | 1.00         | 0.85        |
| First layer nozzle temperature, °C | 220      | 250         | 260         | 280      | 250         | 250          | 240         |
| First layer table temperature, °C  | 70       | 100         | 100         | 110      | 100         | 95           | 110         |
| First layer thickness, %           | 100      | 100         | 100         | 100      | 100         | 100          | 100         |
| Part cooling, %                    | 10       | 0           | 0           | 0        | 0           | 0            | 40          |

\* for the manufacturing of samples for determining chemical resistance in various solvents, determining heat resistance, mechanical strength and shrinkage.

## 2. Chemical resistance of 3D printed test samples in various solvents

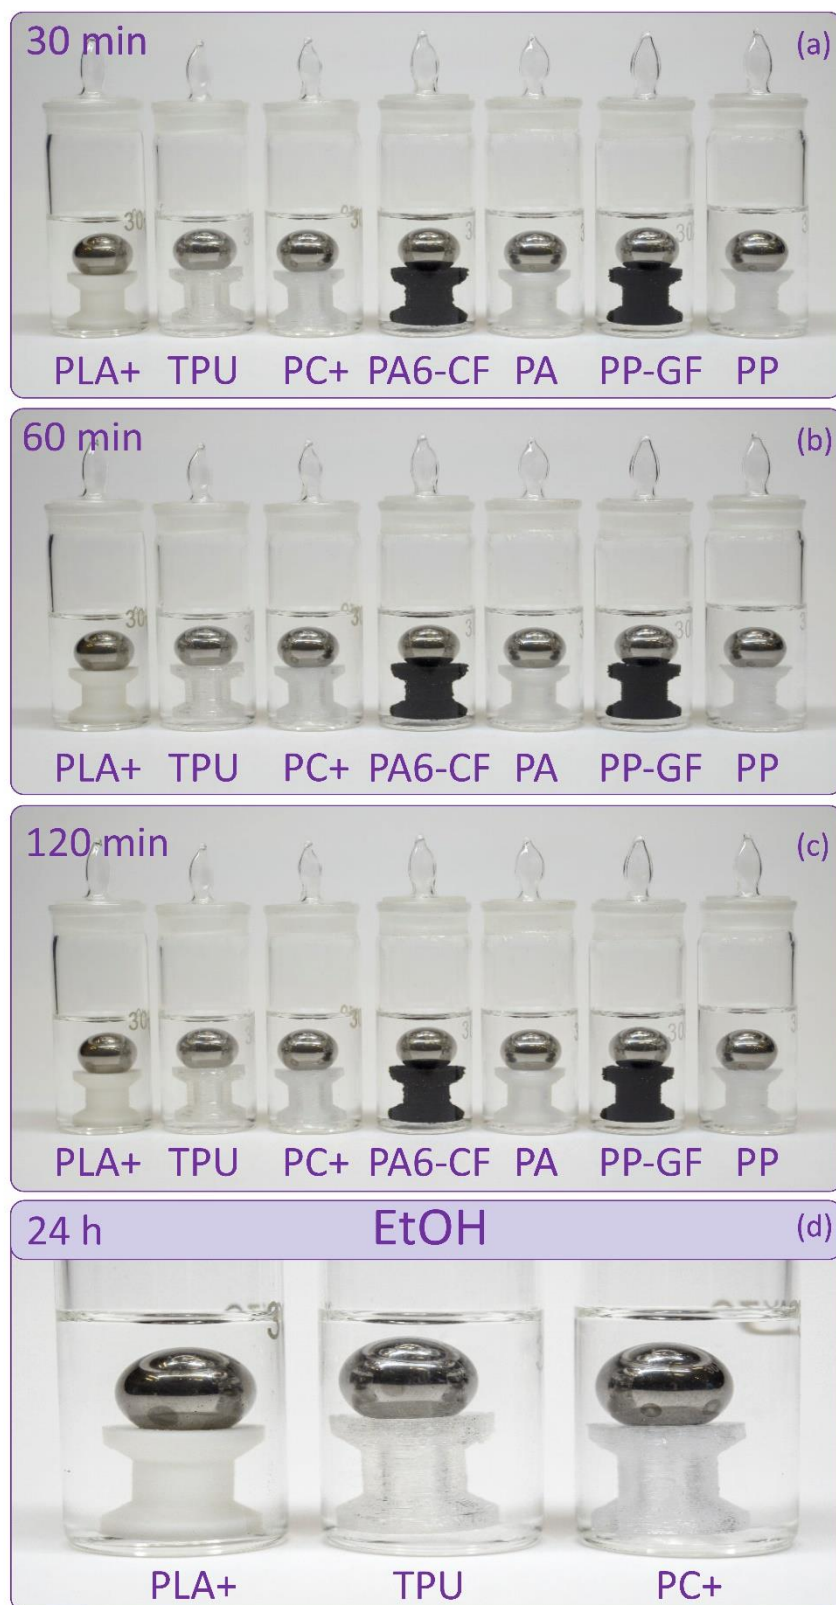

**Figure S1.** Stability test of parts manufactured by the FFF method in ethanol medium for 24 hours: (a) – result after 30 min in a solvent environment; (b) – after 60 min; (c) – after 120 min; (d) – after 2 hours.

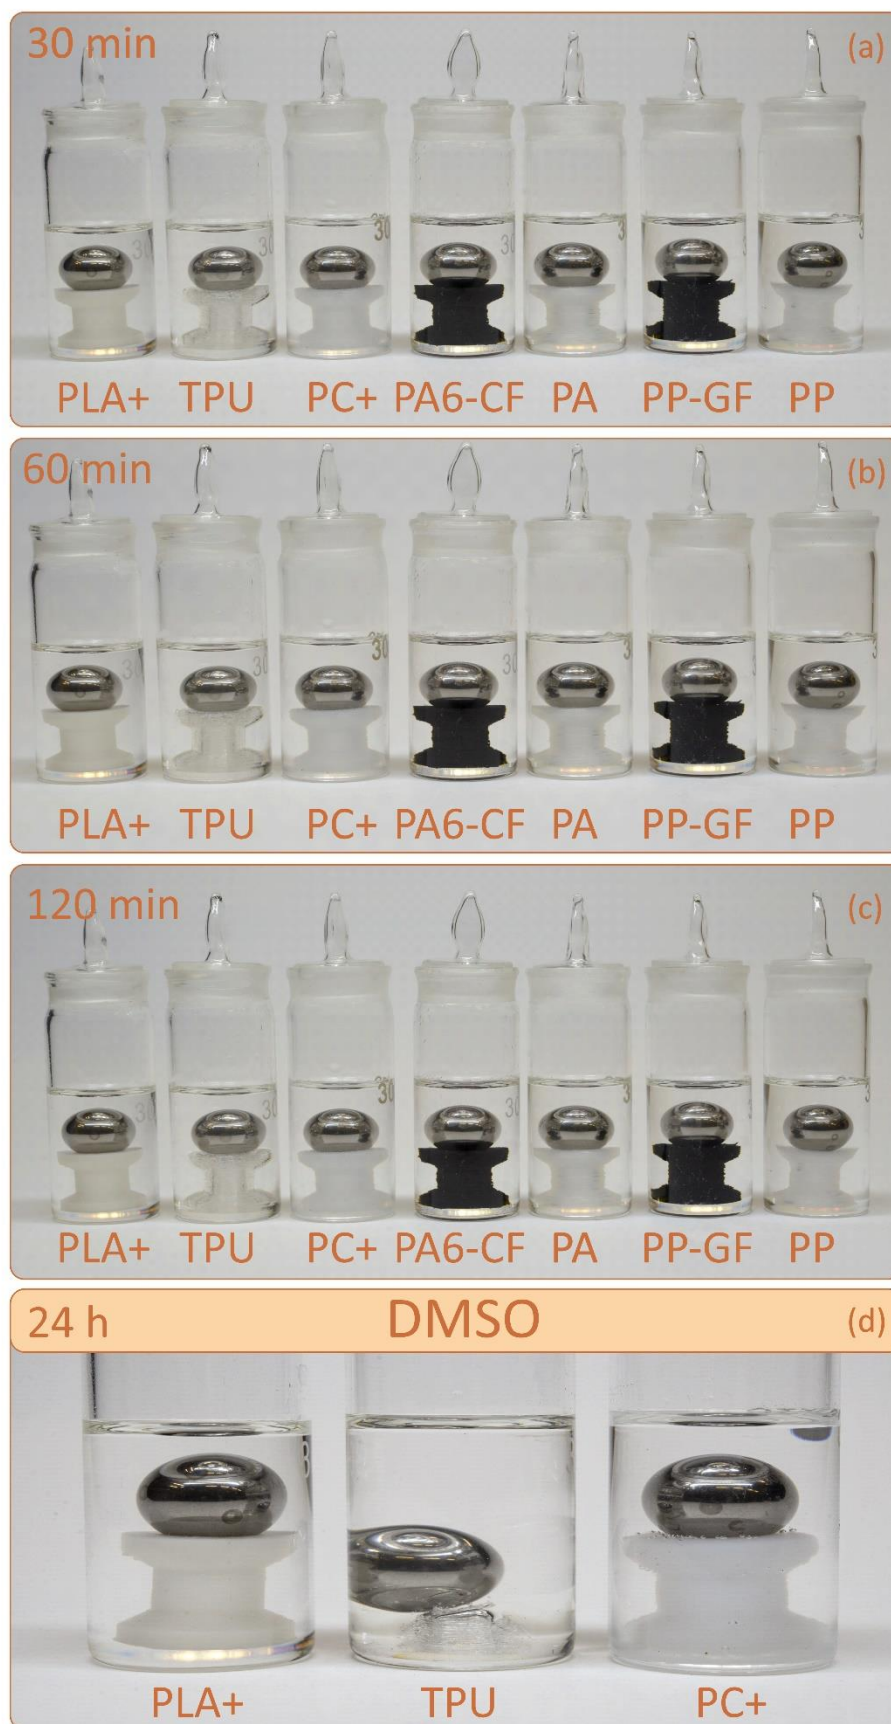

**Figure S2.** Stability test of parts manufactured by the FFF method in dimethyl sulfoxide for 24 hours: (a) – result after 30 minutes in a solvent medium; (b) – after 60 min; (c) – after 120 min; (d) – after 2 hours.

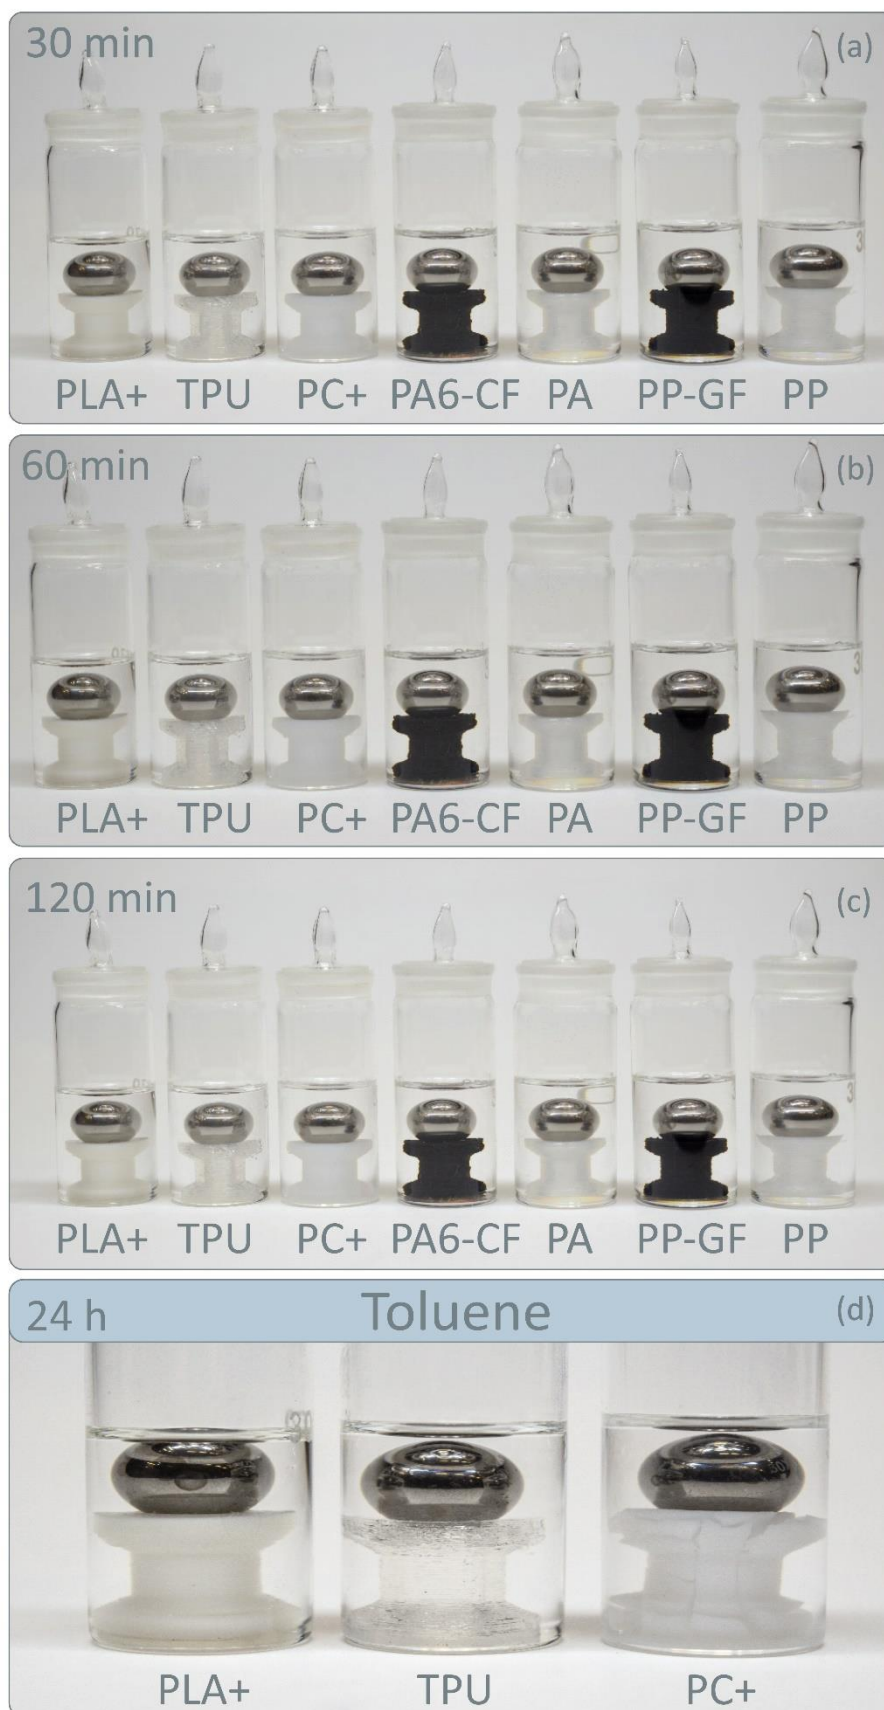

**Figure S3.** Stability test of parts manufactured by the FFF method in toluene for 24 hours: (a) – result after 30 minutes in a solvent medium; (b) – after 60 min; (c) – after 120 min; (d) – after 2 hours.

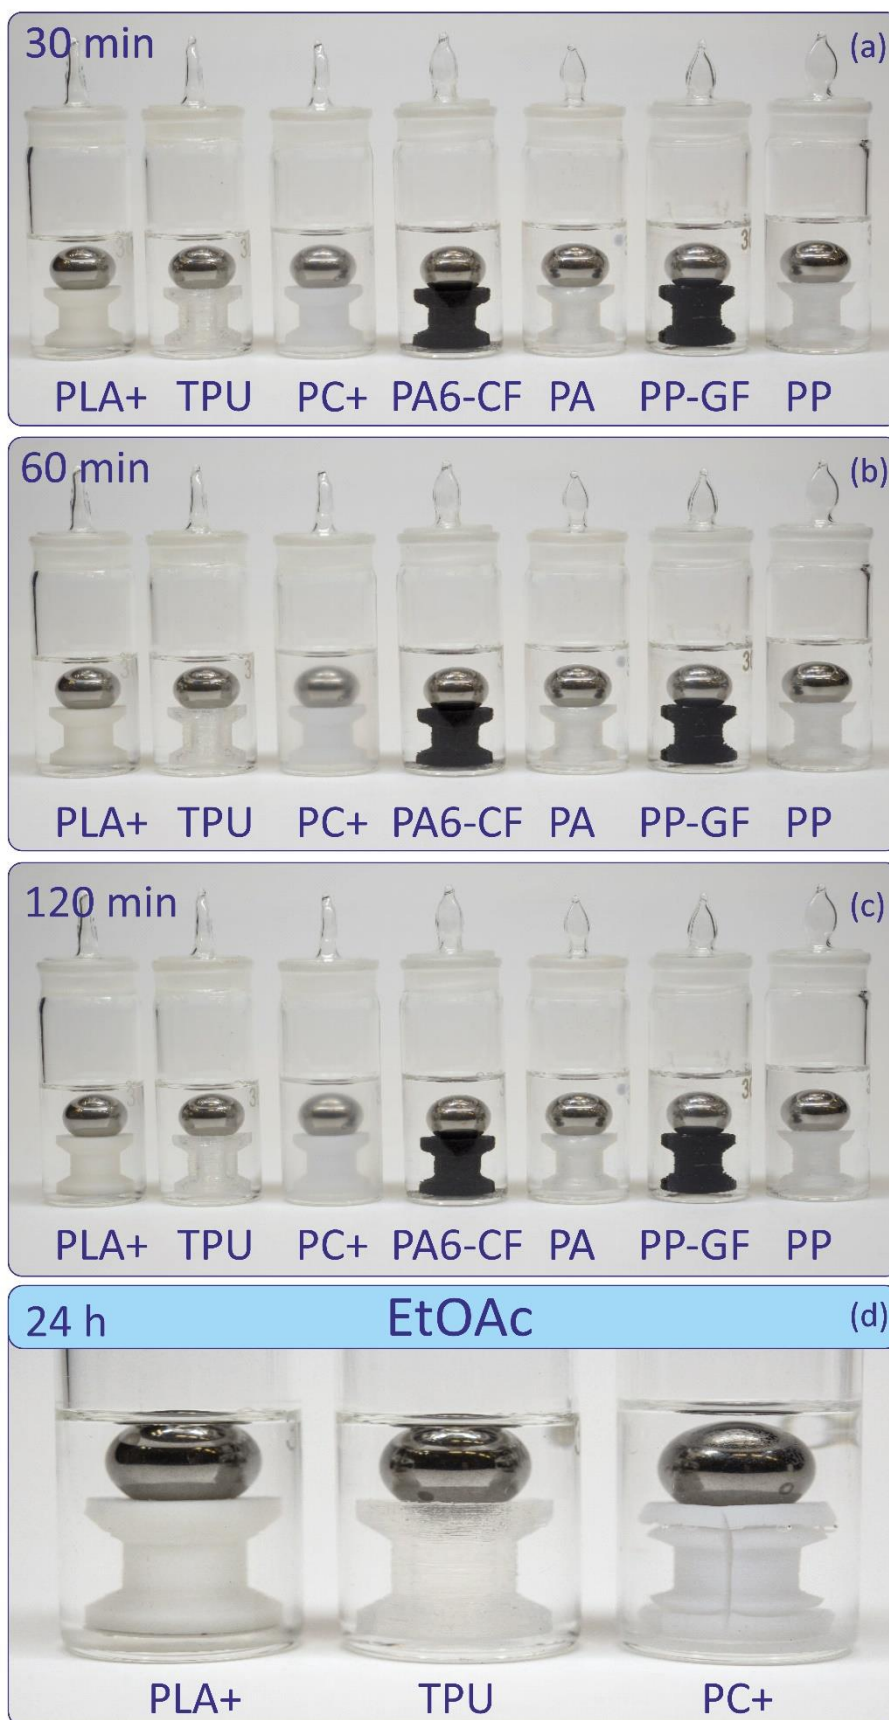

**Figure S4.** Stability test of parts manufactured by the FFF method in ethyl acetate medium for 24 hours: (a) – result after 30 minutes in a solvent medium; (b) – after 60 min; (c) – after 120 min; (d) – after 2 hours.

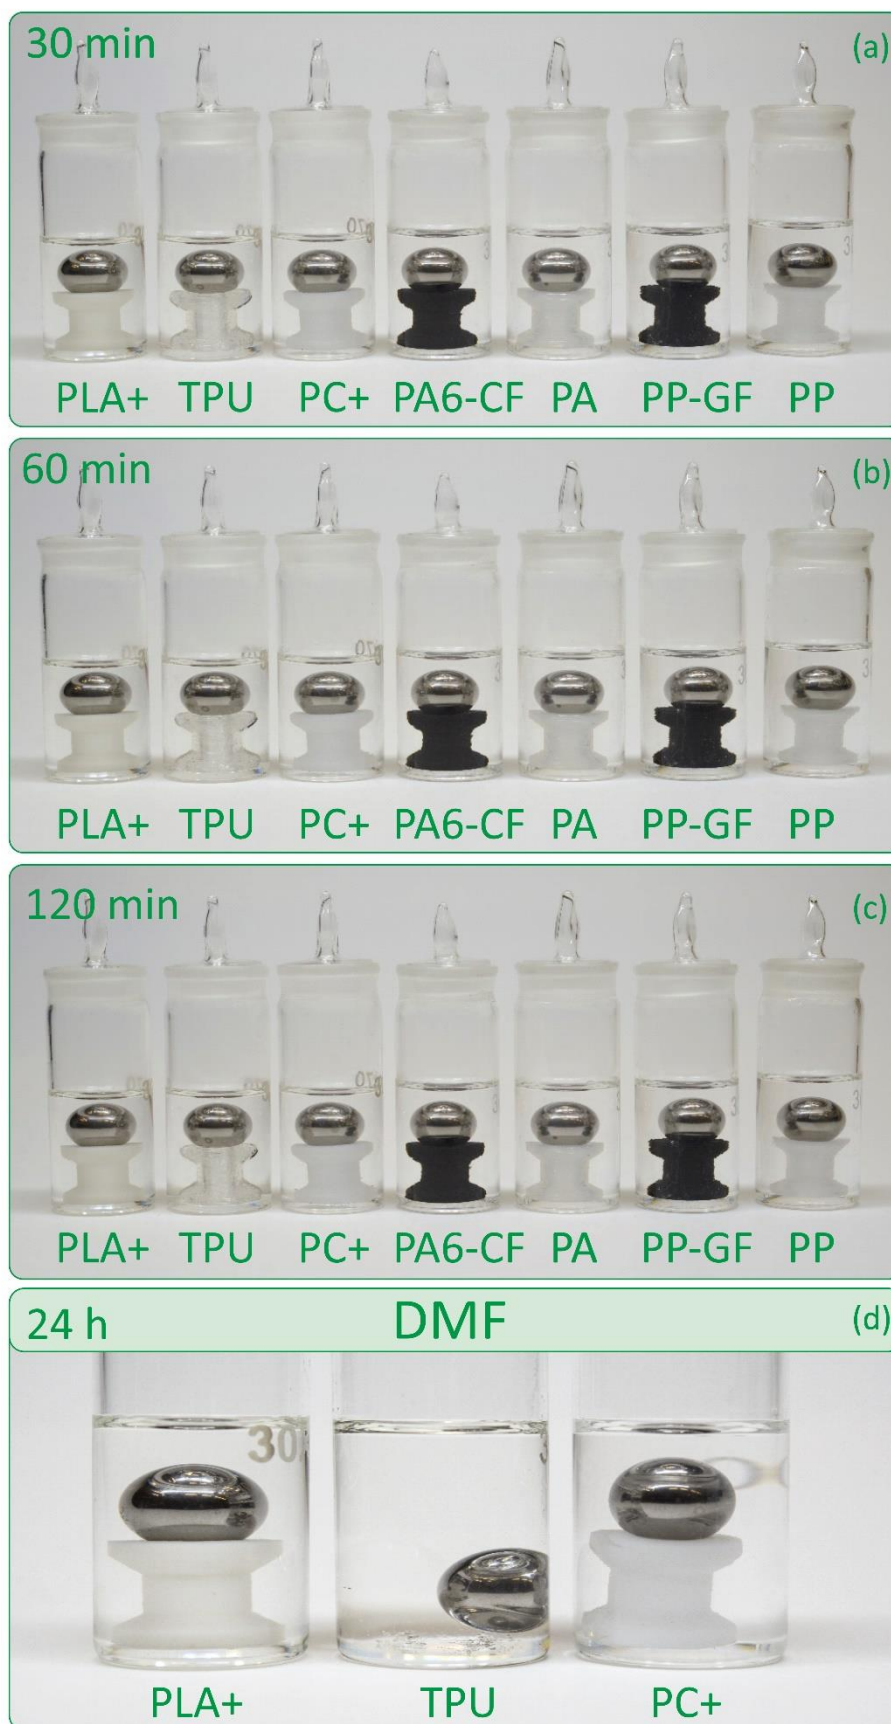

**Figure S5.** Stability test of parts manufactured by the FFF method in a dimethylformamide medium for 24 hours: (a) after 30 minutes in a solvent medium; (b) after 60 min; (c) after 120 min; (d) after 2 hours.

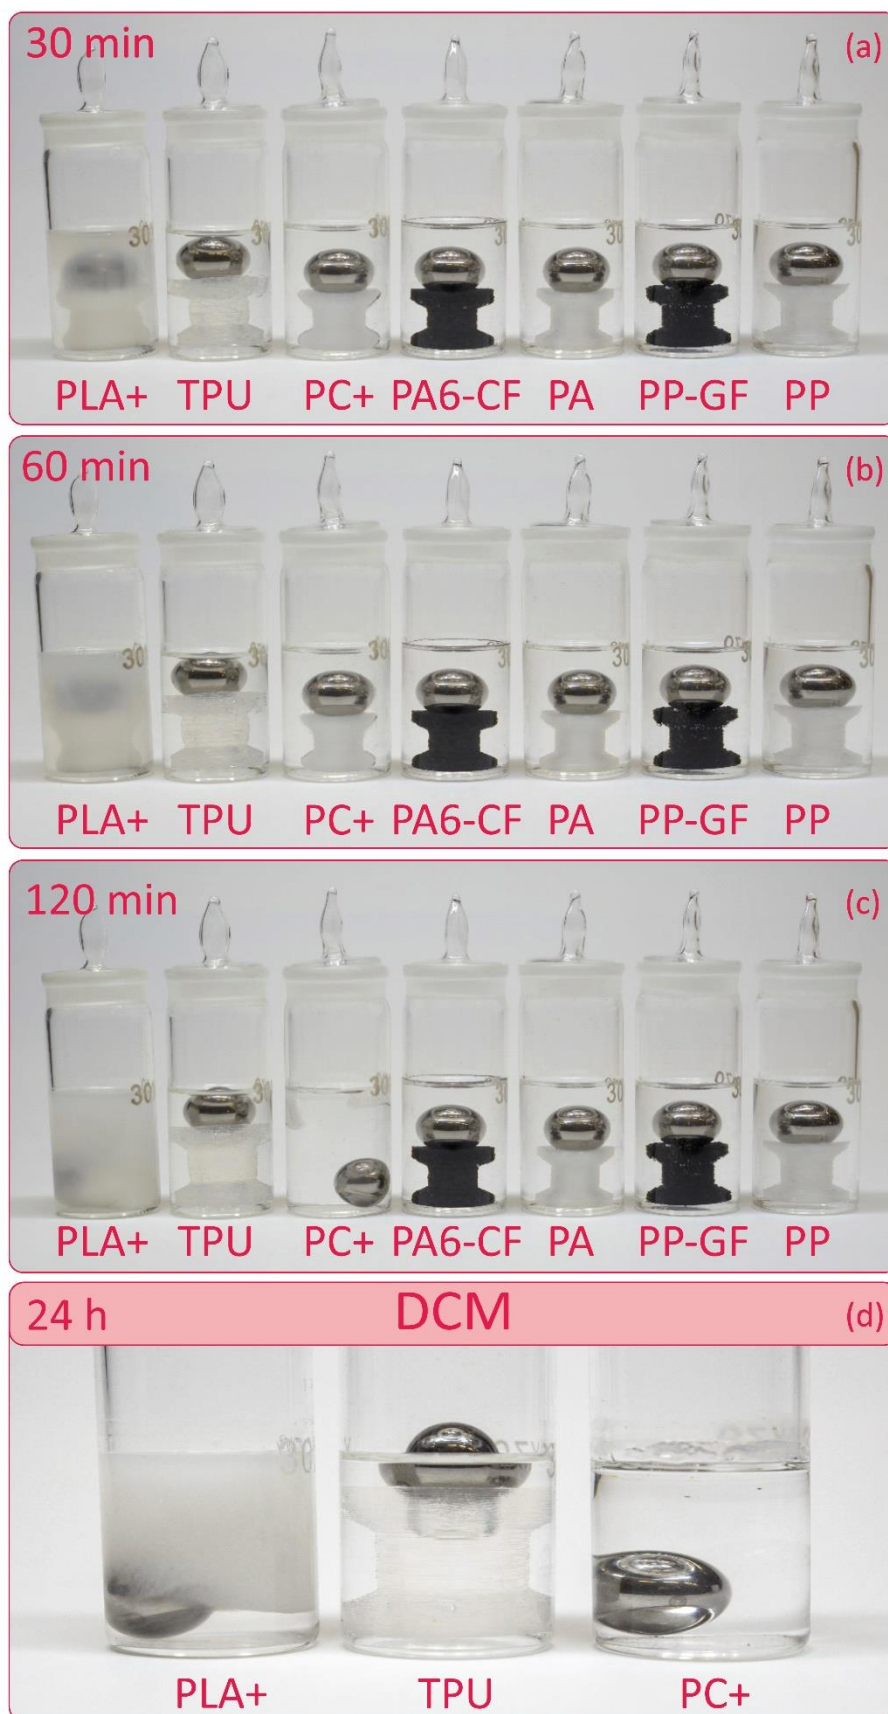

**Figure S6.** Stability test of parts manufactured by the FFF method in methylene chloride for 24 hours: (a) – result after 30 minutes in a solvent medium; (b) – after 60 min; (c) – after 120 min; (d) – after 2 hours.

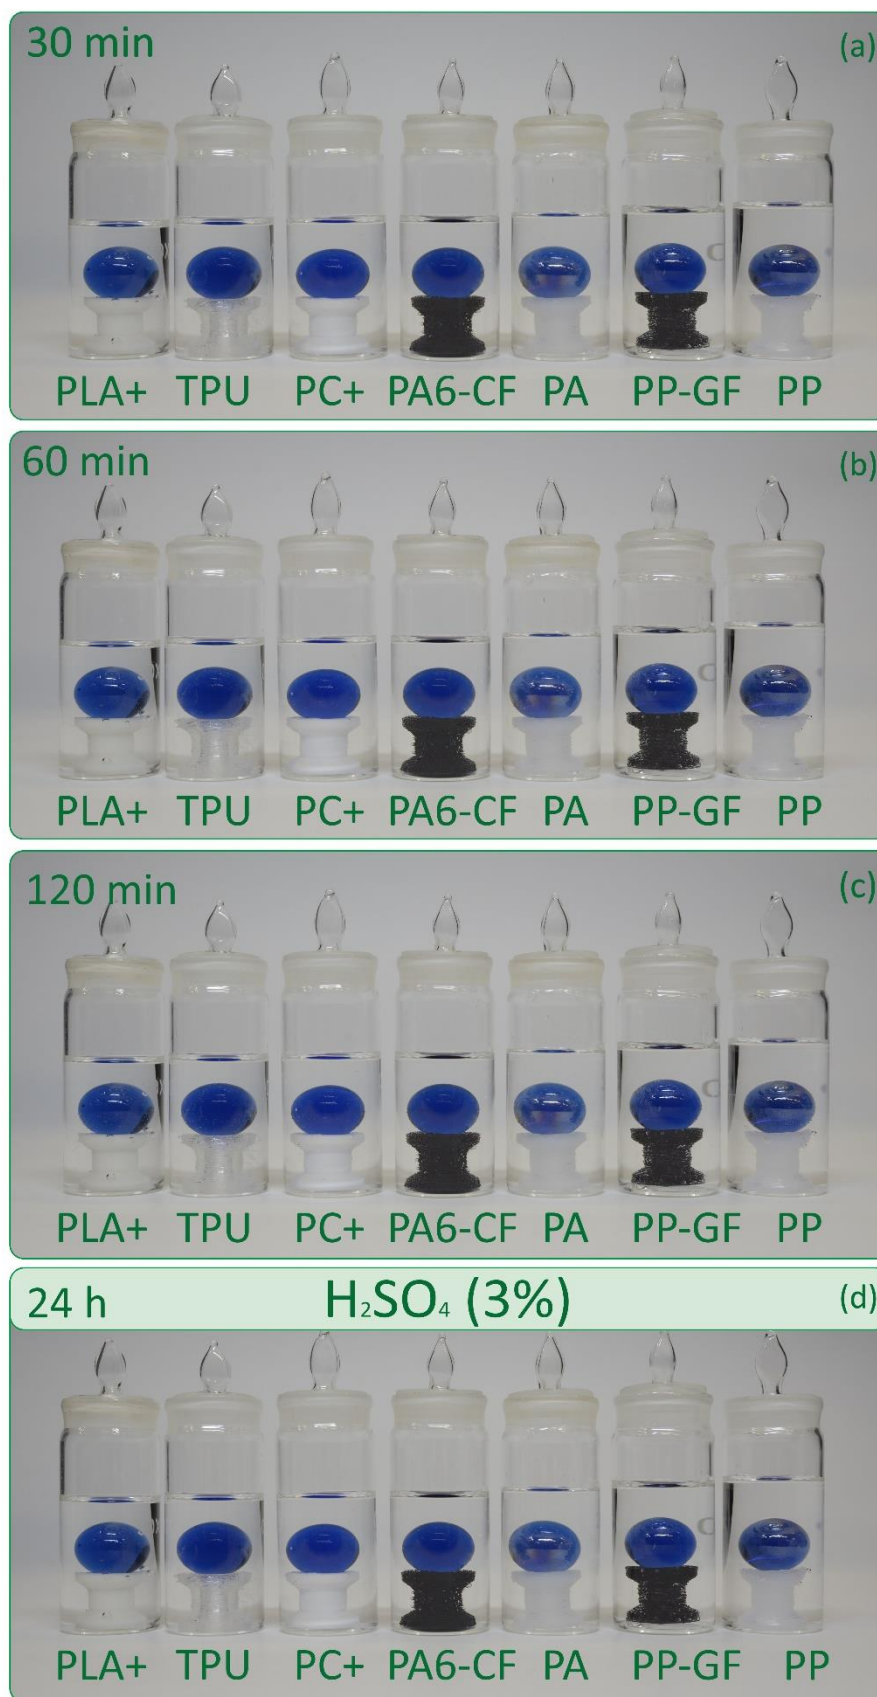

**Figure S7.** Stability test of parts manufactured by the FFF method in sulfuric acid with a concentration of 3% for 24 hours: (a) – result after 30 minutes in a solvent medium; (b) – after 60 min; (c) – after 120 min; (d) – after 2 hours.

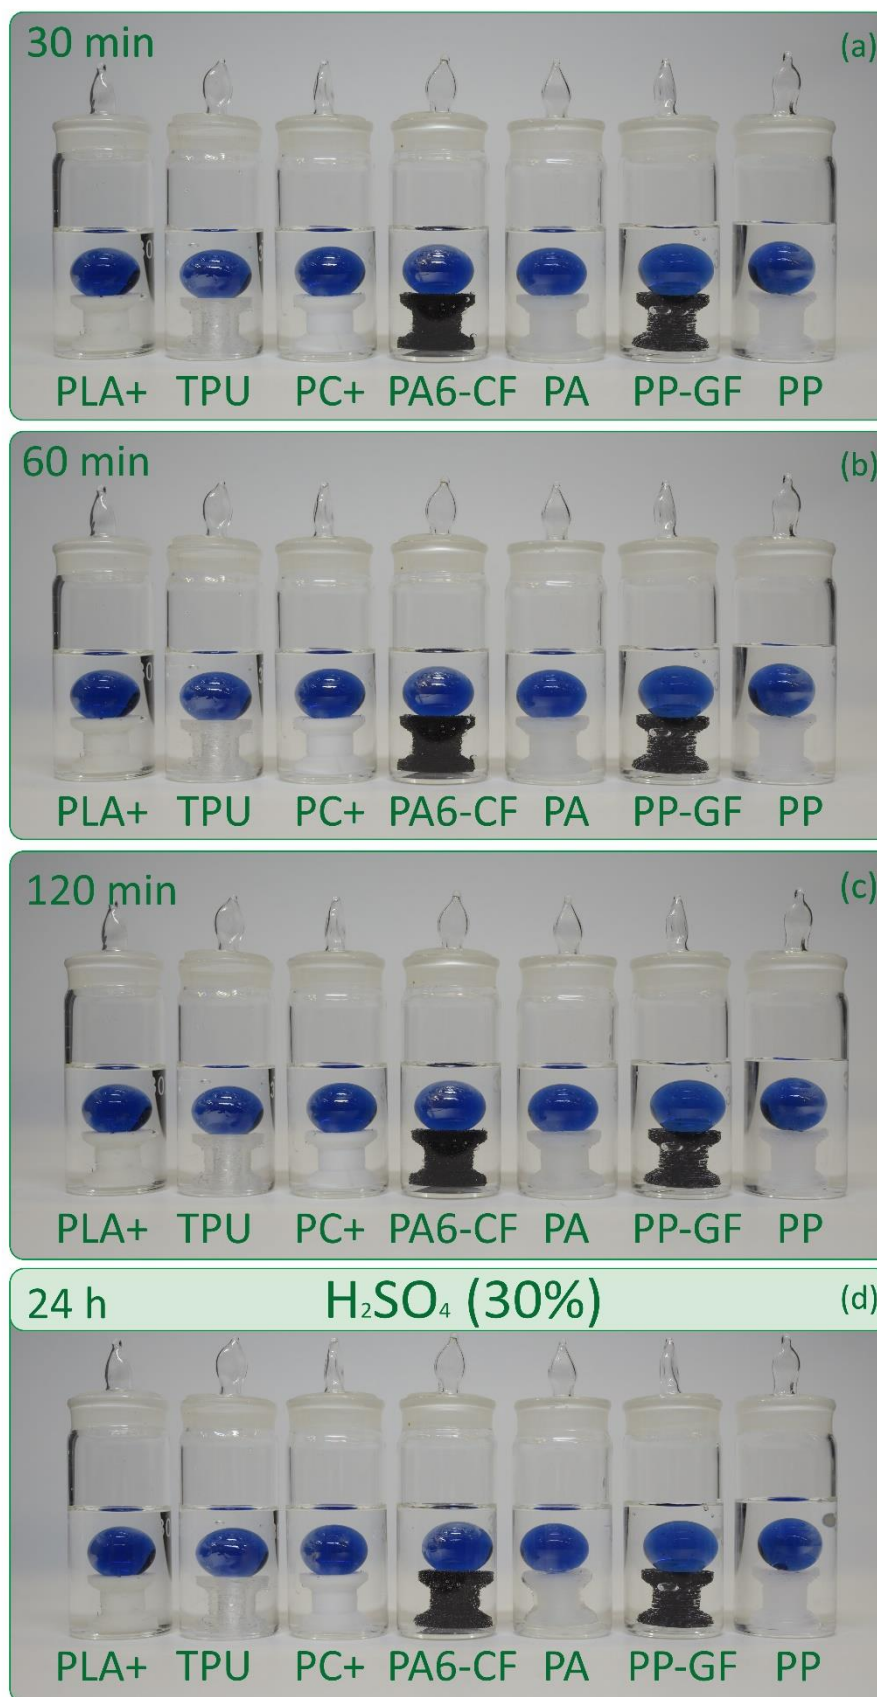

**Figure S8.** Stability test of parts manufactured by the FFF method in sulfuric acid with a concentration of 30% for 24 hours: (a) – result after 30 minutes in a solvent medium; (b) – after 60 min; (c) – after 120 min; (d) – after 2 hours.

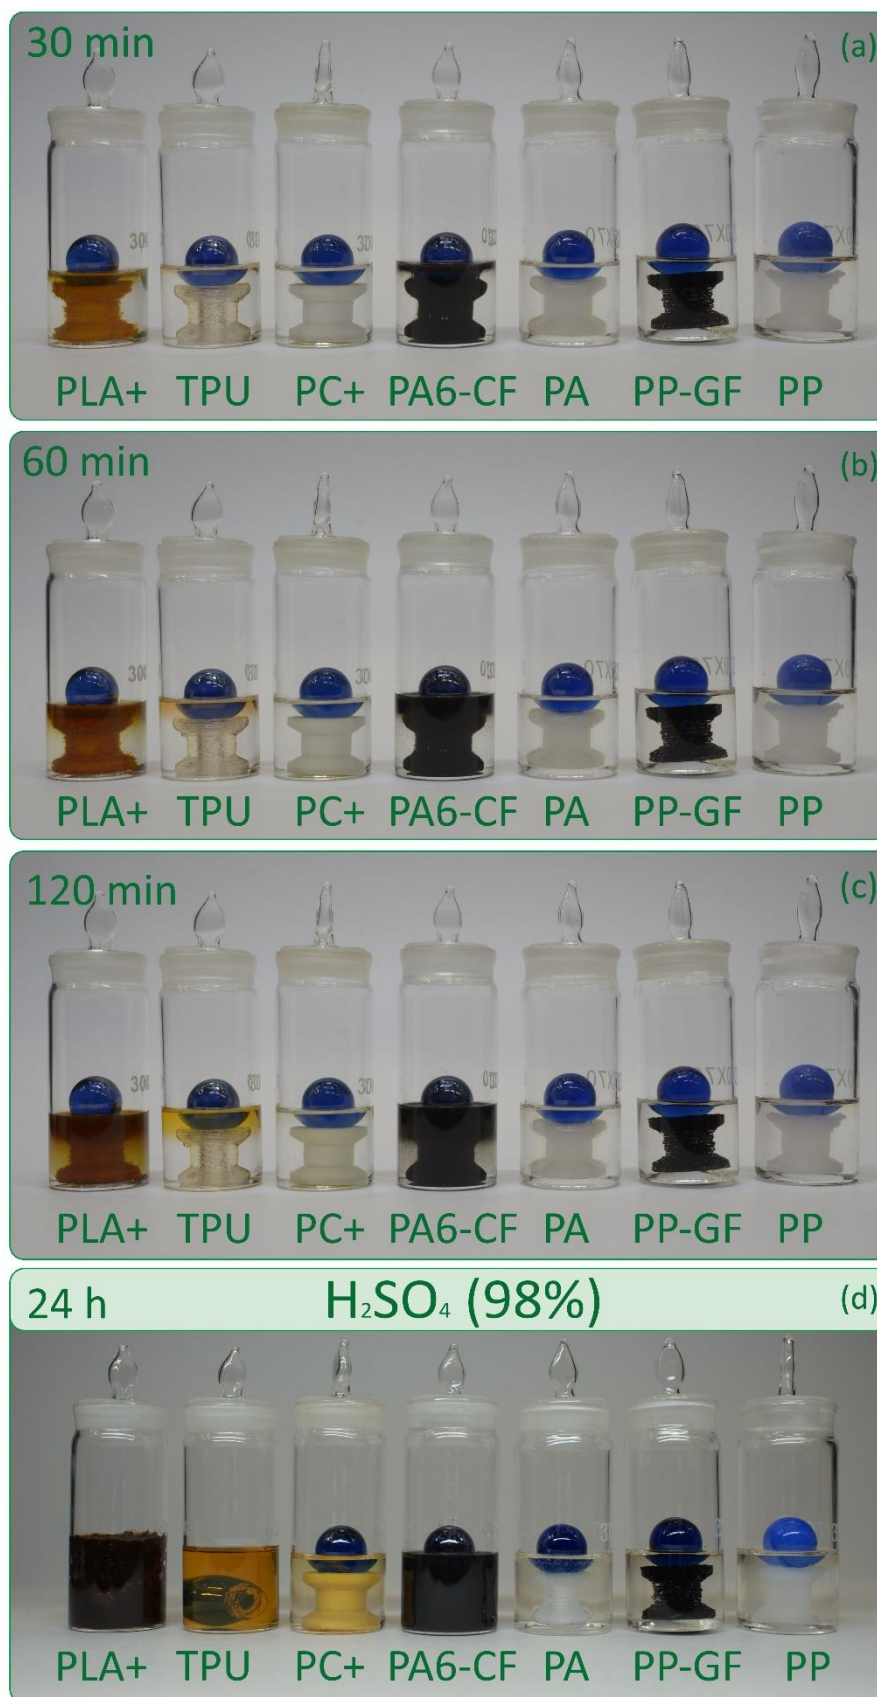

**Figure S9.** Stability test of parts manufactured by the FFF method in sulfuric acid with a concentration of 98% for 24 hours: (a) – result after 30 minutes in a solvent medium; (b) – after 60 min; (c) – after 120 min; (d) – after 2 hours.

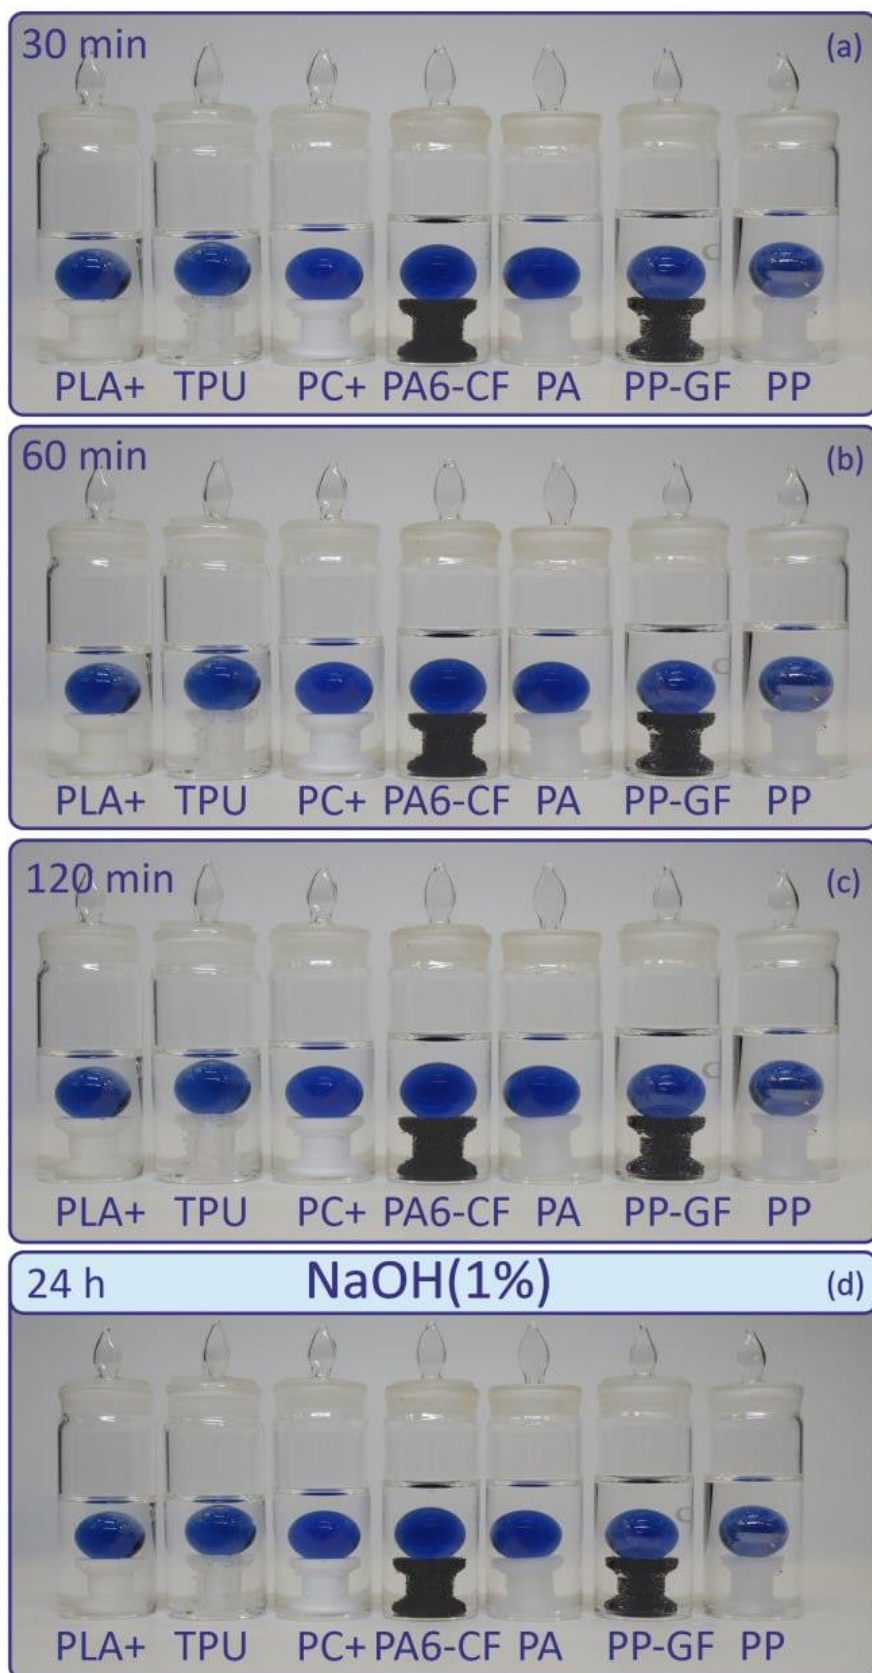

**Figure S10.** Stability test of parts manufactured by the FFF method in sodium hydroxide with a concentration of 1% for 24 hours: (a) – result after 30 minutes in a solvent medium; (b) – after 60 min; (c) – after 120 min; (d) – after 2 hours.

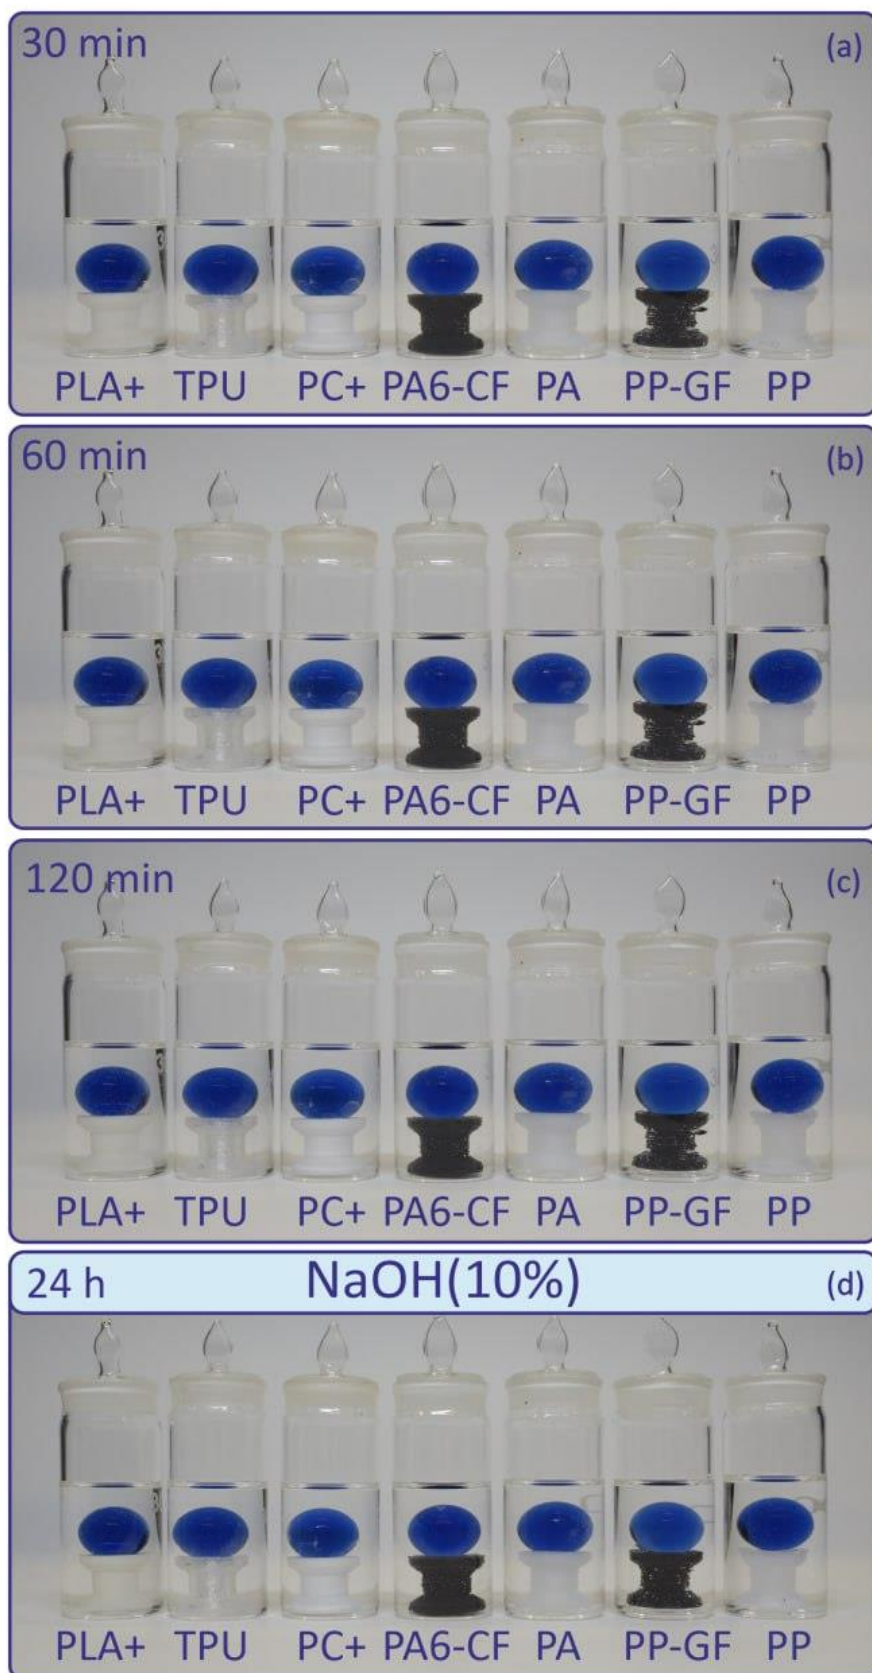

**Figure S11.** Stability test of parts manufactured by the FFF method in sodium hydroxide with a concentration of 10% for 24 hours: (a) – result after 30 minutes in a solvent medium; (b) – after 60 min; (c) – after 120 min; (d) – after 2 hours.

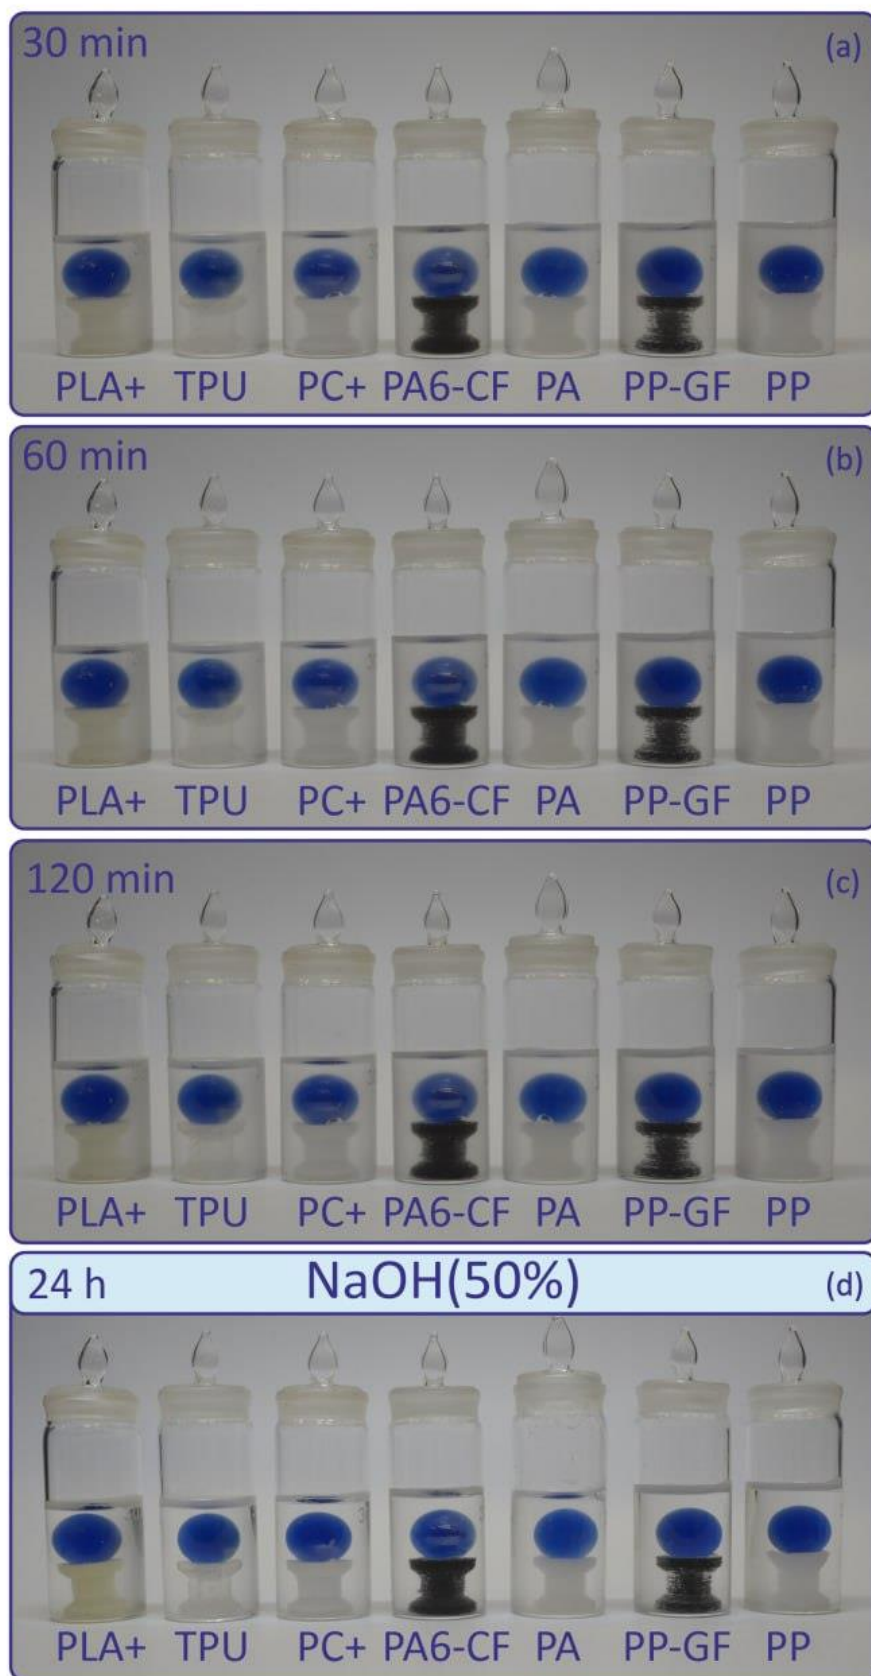

**Figure S12.** Stability test of parts manufactured by the FFF method in sodium hydroxide with a concentration of 50% for 24 hours: (a) – result after 30 minutes in a solvent medium; (b) – after 60 min; (c) – after 120 min; (d) – after 2 hours.

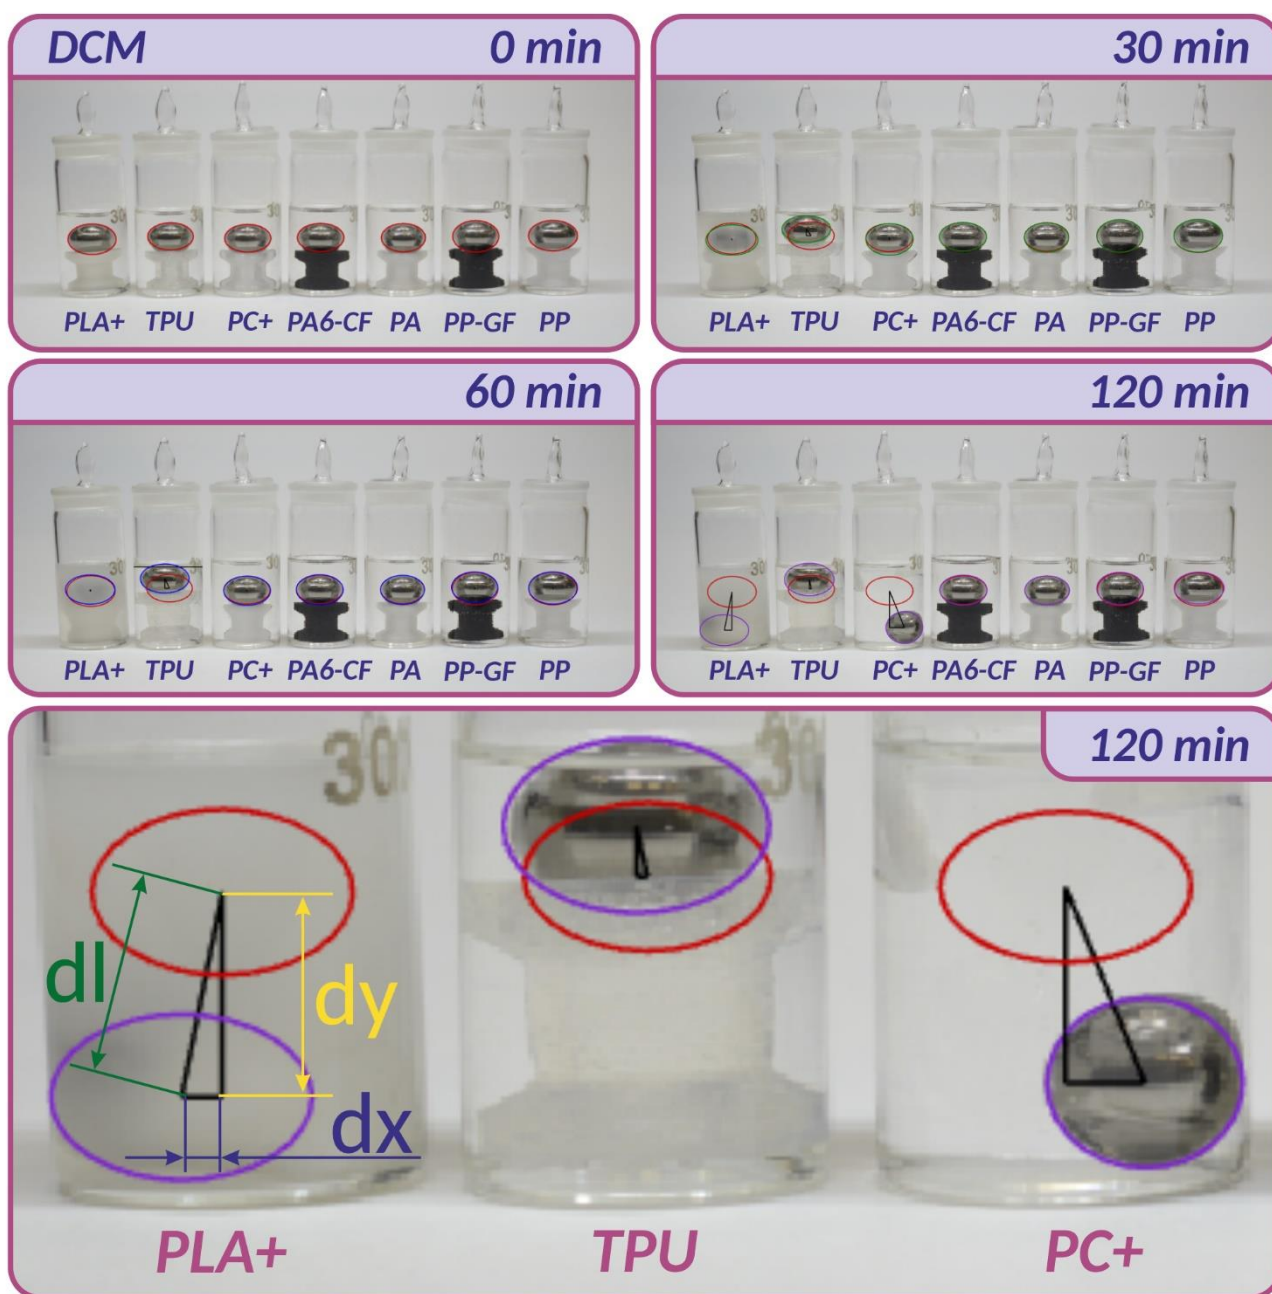

**Figure S13.** Quantitative determination of the chemical resistance of 3D printed samples in methylene chloride.

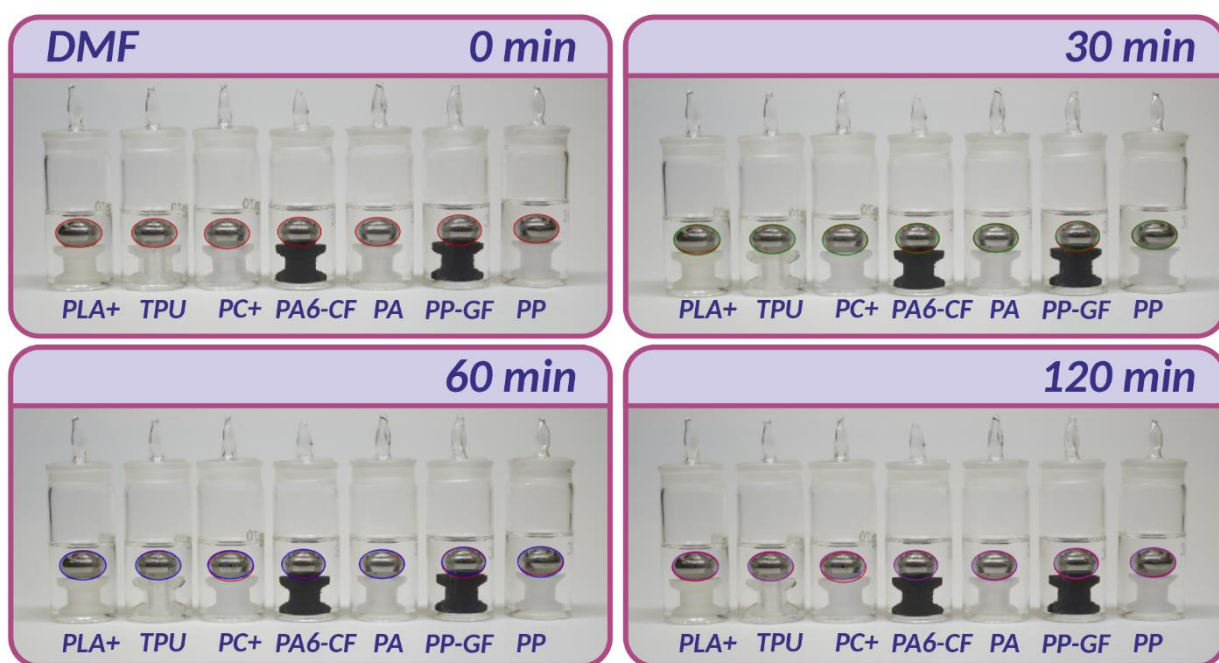

**Figure S14.** Quantitative determination of the chemical resistance of 3D printed samples in dimethylformamide.

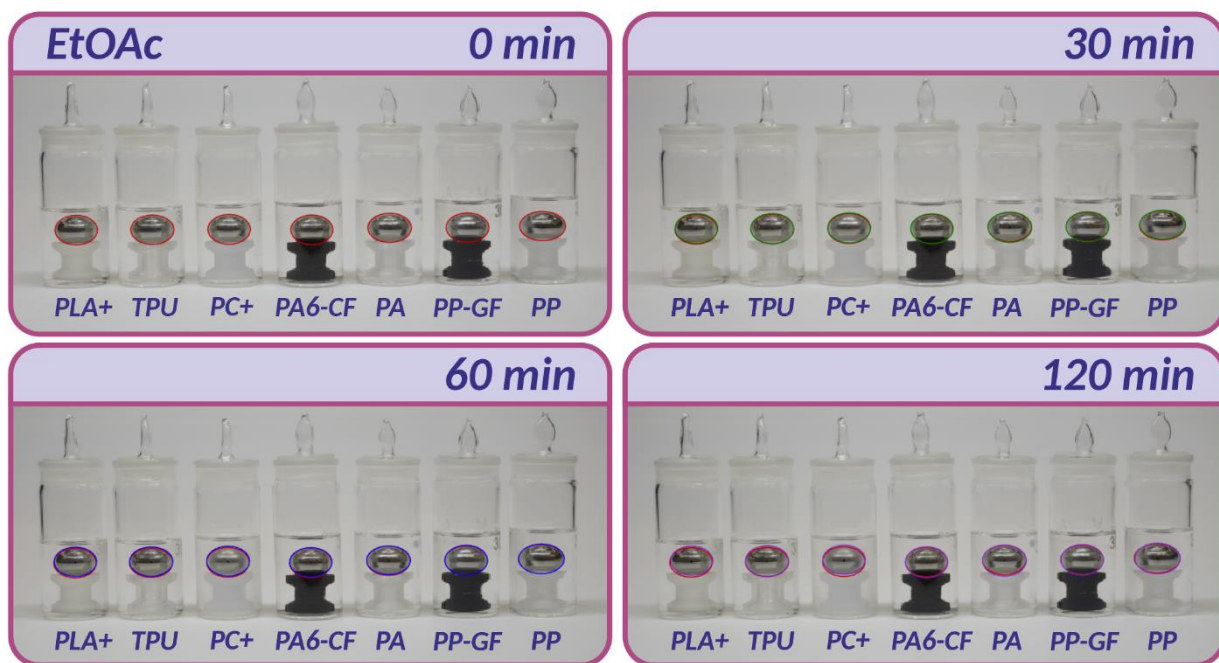

**Figure S15.** Quantitative determination of the chemical resistance of 3D printed samples in ethyl acetate.

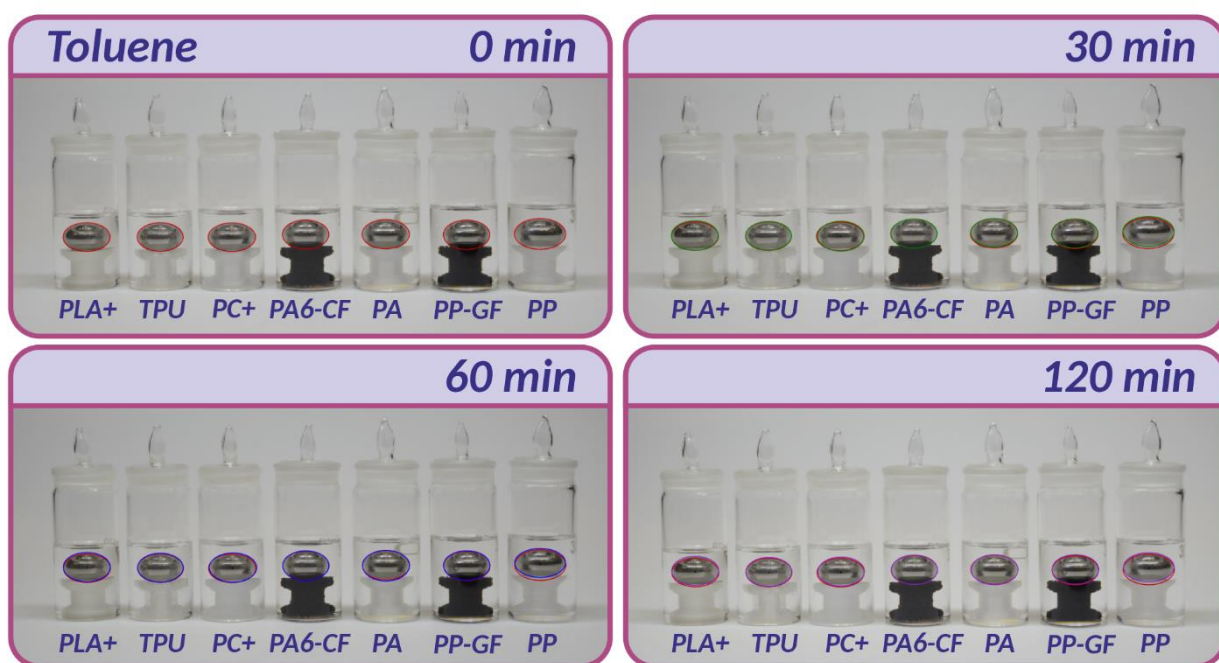

**Figure S16.** Quantitative determination of the chemical resistance of 3D printed samples in toluene.

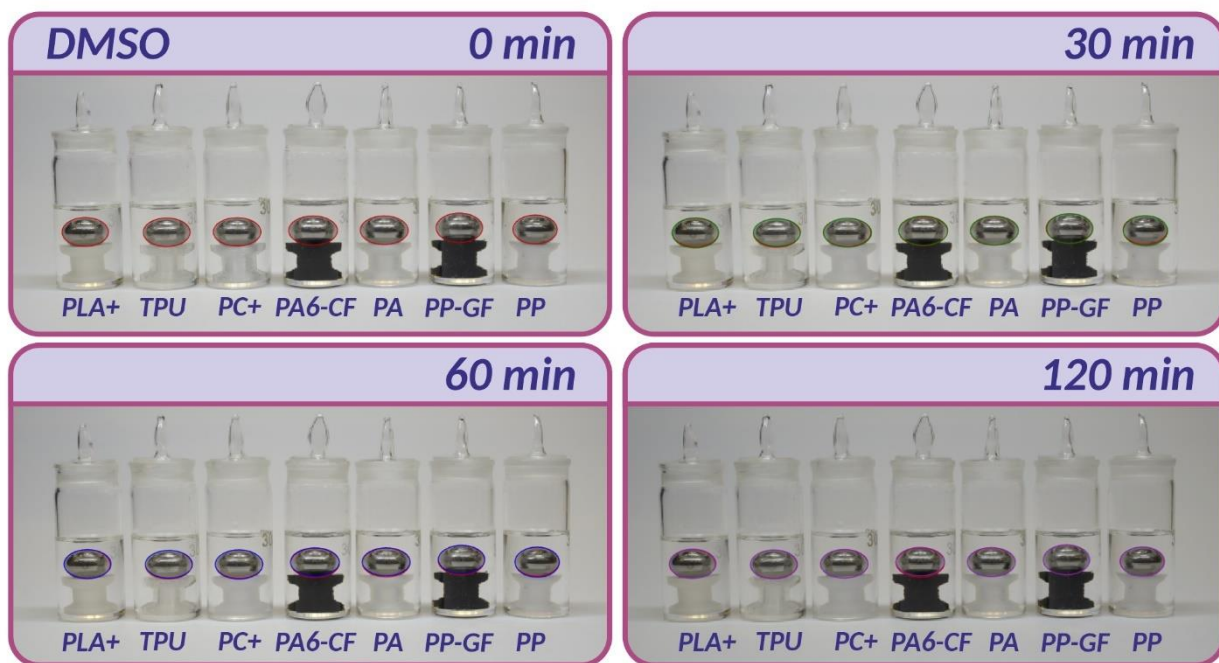

**Figure S17.** Quantitative determination of the chemical resistance of 3D printed samples in dimethyl sulfoxide.

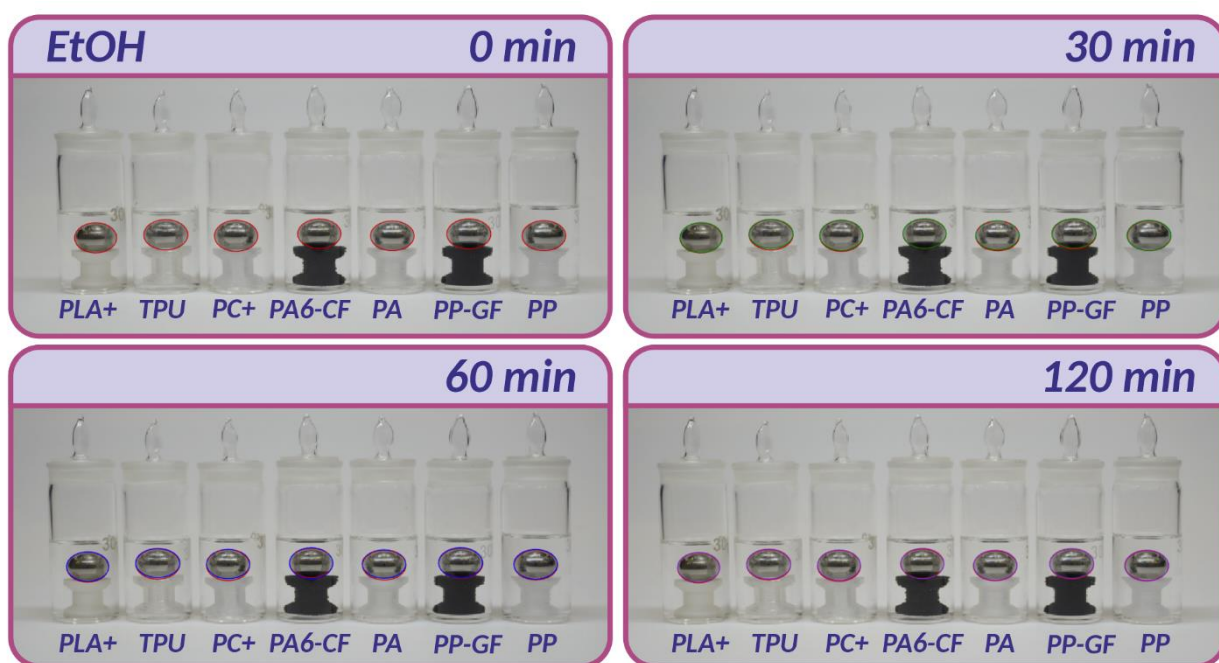

**Figure S18.** Quantitative determination of the chemical resistance of 3D printed samples in ethanol.

**Table S2.** Quantitative values of deformation of 3D printed samples. dx, dy, dl - measurement in mm.

| PLA+   | EtOH |      |      | DMSO |      |      | Toluene |      |      | EtOAc |      |      | DMF  |      |      | DCM   |       |       |
|--------|------|------|------|------|------|------|---------|------|------|-------|------|------|------|------|------|-------|-------|-------|
| min    | dx   | dy   | dl   | dx   | dy   | dl   | dx      | dy   | dl   | dx    | dy   | dl   | dx   | dy   | dl   | dx    | dy    | dl    |
| 30.00  | 0.11 | 0.12 | 0.16 | 0.03 | 0.13 | 0.13 | 0.06    | 0.27 | 0.28 | 0.12  | 0.42 | 0.44 | 0.08 | 0.20 | 0.21 | 0.07  | 0.62  | 0.62  |
| 60.00  | 0.05 | 0.21 | 0.21 | 0.14 | 0.12 | 0.19 | 0.07    | 0.48 | 0.48 | 0.20  | 0.61 | 0.64 | 0.07 | 0.08 | 0.11 | 0.31  | 0.69  | 0.76  |
| 120.00 | 0.05 | 0.23 | 0.23 | 0.14 | 0.13 | 0.19 | 0.08    | 0.79 | 0.79 | 0.34  | 0.78 | 0.85 | 0.18 | 0.40 | 0.44 | 3.30  | 16.60 | 16.92 |
| TPU    | EtOH |      |      | DMSO |      |      | Toluene |      |      | EtOAc |      |      | DMF  |      |      | DCM   |       |       |
| min    | dx   | dy   | dl   | dx   | dy   | dl   | dx      | dy   | dl   | dx    | dy   | dl   | dx   | dy   | dl   | dx    | dy    | dl    |
| 30.00  | 0.01 | 0.41 | 0.41 | 0.10 | 0.20 | 0.22 | 0.01    | 0.14 | 0.14 | 0.04  | 0.09 | 0.10 | 0.00 | 0.06 | 0.06 | 2.10  | 2.88  | 3.56  |
| 60.00  | 0.02 | 0.44 | 0.44 | 0.09 | 0.16 | 0.18 | 0.05    | 0.19 | 0.19 | 0.06  | 0.53 | 0.53 | 0.05 | 0.07 | 0.09 | 2.07  | 4.29  | 4.76  |
| 120.00 | 0.01 | 0.29 | 0.29 | 0.05 | 0.05 | 0.07 | 0.05    | 0.26 | 0.26 | 0.02  | 0.45 | 0.45 | 0.15 | 0.14 | 0.21 | 0.91  | 4.14  | 4.24  |
| PC+    | EtOH |      |      | DMSO |      |      | Toluene |      |      | EtOAc |      |      | DMF  |      |      | DCM   |       |       |
| min    | dx   | dy   | dl   | dx   | dy   | dl   | dx      | dy   | dl   | dx    | dy   | dl   | dx   | dy   | dl   | dx    | dy    | dl    |
| 30.00  | 0.00 | 0.26 | 0.26 | 0.16 | 0.10 | 0.19 | 0.31    | 0.07 | 0.32 | 0.05  | 0.32 | 0.33 | 0.13 | 0.13 | 0.18 | 0.11  | 0.80  | 0.80  |
| 60.00  | 0.07 | 0.48 | 0.49 | 0.02 | 0.13 | 0.13 | 0.37    | 0.32 | 0.49 | 0.10  | 0.57 | 0.58 | 0.18 | 0.64 | 0.67 | 0.15  | 0.24  | 0.28  |
| 120.00 | 0.01 | 0.33 | 0.33 | 0.06 | 0.04 | 0.07 | 0.25    | 0.50 | 0.56 | 0.07  | 0.91 | 0.91 | 0.34 | 0.92 | 0.98 | 15.88 | 6.42  | 17.12 |
| PA6-CF | EtOH |      |      | DMSO |      |      | Toluene |      |      | EtOAc |      |      | DMF  |      |      | DCM   |       |       |
| min    | dx   | dy   | dl   | dx   | dy   | dl   | dx      | dy   | dl   | dx    | dy   | dl   | dx   | dy   | dl   | dx    | dy    | dl    |
| 30.00  | 0.00 | 0.09 | 0.09 | 0.05 | 0.21 | 0.22 | 0.06    | 0.05 | 0.08 | 0.08  | 0.14 | 0.16 | 0.01 | 0.13 | 0.13 | 0.01  | 0.04  | 0.05  |
| 60.00  | 0.02 | 0.09 | 0.10 | 0.06 | 0.37 | 0.37 | 0.00    | 0.07 | 0.07 | 0.11  | 0.29 | 0.31 | 0.08 | 0.09 | 0.12 | 0.02  | 0.15  | 0.16  |
| 120.00 | 0.09 | 0.08 | 0.12 | 0.03 | 0.43 | 0.43 | 0.05    | 0.12 | 0.13 | 0.03  | 0.07 | 0.08 | 0.02 | 0.12 | 0.12 | 0.04  | 0.01  | 0.04  |
| PA     | EtOH |      |      | DMSO |      |      | Toluene |      |      | EtOAc |      |      | DMF  |      |      | DCM   |       |       |
| min    | dx   | dy   | dl   | dx   | dy   | dl   | dx      | dy   | dl   | dx    | dy   | dl   | dx   | dy   | dl   | dx    | dy    | dl    |
| 30.00  | 0.04 | 0.25 | 0.25 | 0.05 | 0.16 | 0.16 | 0.07    | 0.30 | 0.31 | 0.13  | 0.12 | 0.17 | 0.15 | 0.13 | 0.20 | 0.03  | 0.18  | 0.18  |
| 60.00  | 0.08 | 0.48 | 0.49 | 0.02 | 0.35 | 0.35 | 0.01    | 0.16 | 0.16 | 0.06  | 0.23 | 0.24 | 0.18 | 0.06 | 0.19 | 0.01  | 0.14  | 0.14  |
| 120.00 | 0.05 | 0.25 | 0.25 | 0.01 | 0.11 | 0.11 | 0.07    | 0.03 | 0.07 | 0.04  | 0.25 | 0.26 | 0.08 | 0.07 | 0.11 | 0.04  | 0.01  | 0.04  |
| PP-GF  | EtOH |      |      | DMSO |      |      | Toluene |      |      | EtOAc |      |      | DMF  |      |      | DCM   |       |       |
| min    | dx   | dy   | dl   | dx   | dy   | dl   | dx      | dy   | dl   | dx    | dy   | dl   | dx   | dy   | dl   | dx    | dy    | dl    |
| 30.00  | 0.06 | 0.27 | 0.28 | 0.20 | 0.05 | 0.20 | 0.05    | 0.23 | 0.24 | 0.00  | 0.05 | 0.05 | 0.05 | 0.33 | 0.33 | 0.05  | 0.04  | 0.07  |
| 60.00  | 0.12 | 0.22 | 0.25 | 0.12 | 0.30 | 0.33 | 0.07    | 0.20 | 0.21 | 0.00  | 0.10 | 0.10 | 0.10 | 0.48 | 0.49 | 0.24  | 0.57  | 0.62  |
| 120.00 | 0.03 | 0.17 | 0.18 | 0.02 | 0.02 | 0.03 | 0.04    | 0.37 | 0.37 | 0.05  | 0.02 | 0.05 | 0.19 | 0.33 | 0.38 | 0.21  | 0.36  | 0.41  |
| PP     | EtOH |      |      | DMSO |      |      | Toluene |      |      | EtOAc |      |      | DMF  |      |      | DCM   |       |       |
| min    | dx   | dy   | dl   | dx   | dy   | dl   | dx      | dy   | dl   | dx    | dy   | dl   | dx   | dy   | dl   | dx    | dy    | dl    |
| 30.00  | 0.09 | 0.12 | 0.15 | 0.15 | 0.31 | 0.35 | 0.11    | 0.75 | 0.76 | 0.07  | 0.27 | 0.28 | 0.23 | 0.05 | 0.23 | 0.01  | 0.07  | 0.07  |
| 60.00  | 0.10 | 0.30 | 0.31 | 0.07 | 0.15 | 0.17 | 0.06    | 0.99 | 0.99 | 0.06  | 0.09 | 0.11 | 0.18 | 0.32 | 0.36 | 0.15  | 0.25  | 0.29  |
| 120.00 | 0.01 | 0.10 | 0.10 | 0.01 | 0.11 | 0.11 | 0.01    | 1.00 | 1.00 | 0.15  | 0.07 | 0.17 | 0.19 | 0.07 | 0.20 | 0.09  | 0.54  | 0.55  |

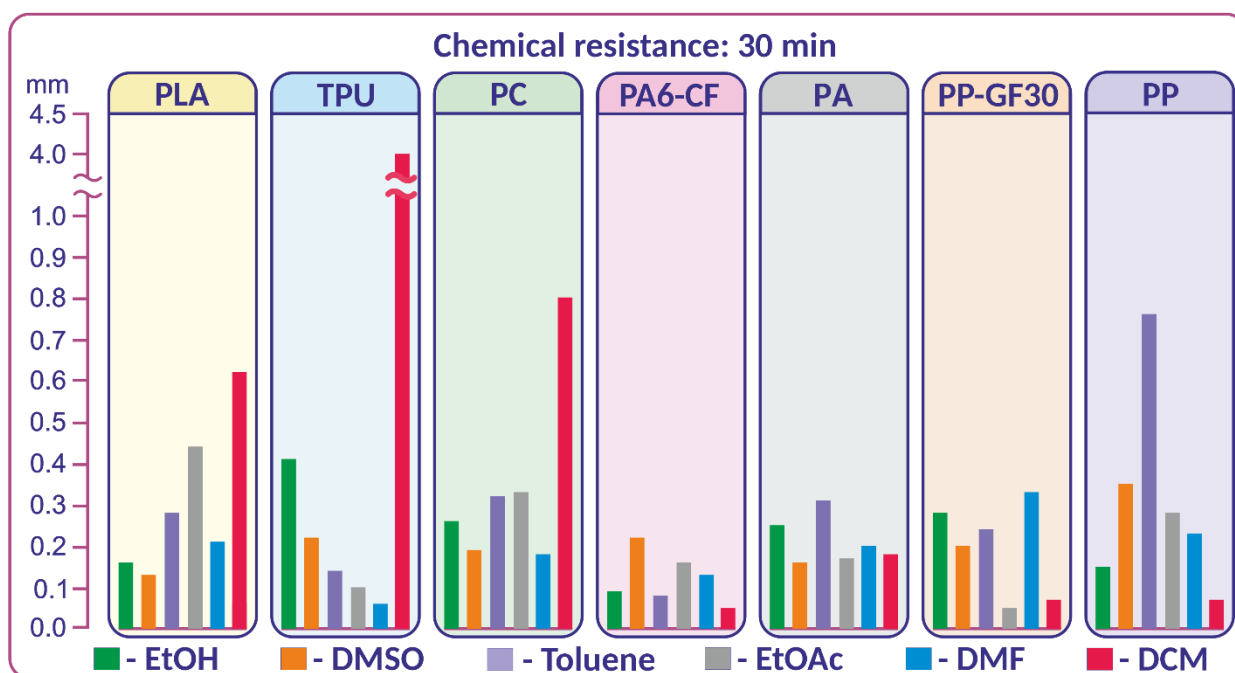

**Figure S19.** Diagram with quantitative calculations of the chemical resistance of 3D printed samples when exposed to various solvents for 30 minutes.

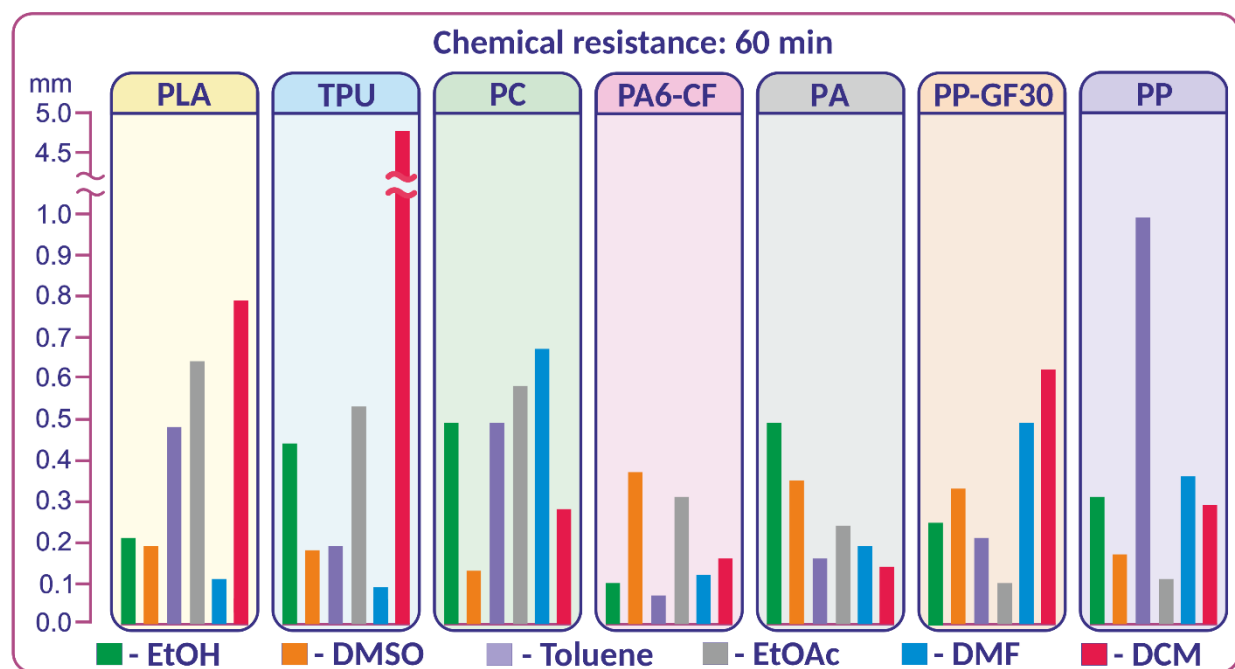

**Figure S20.** Diagram with quantitative calculations of the chemical resistance of 3D printed samples when exposed to various solvents for 60 minutes.

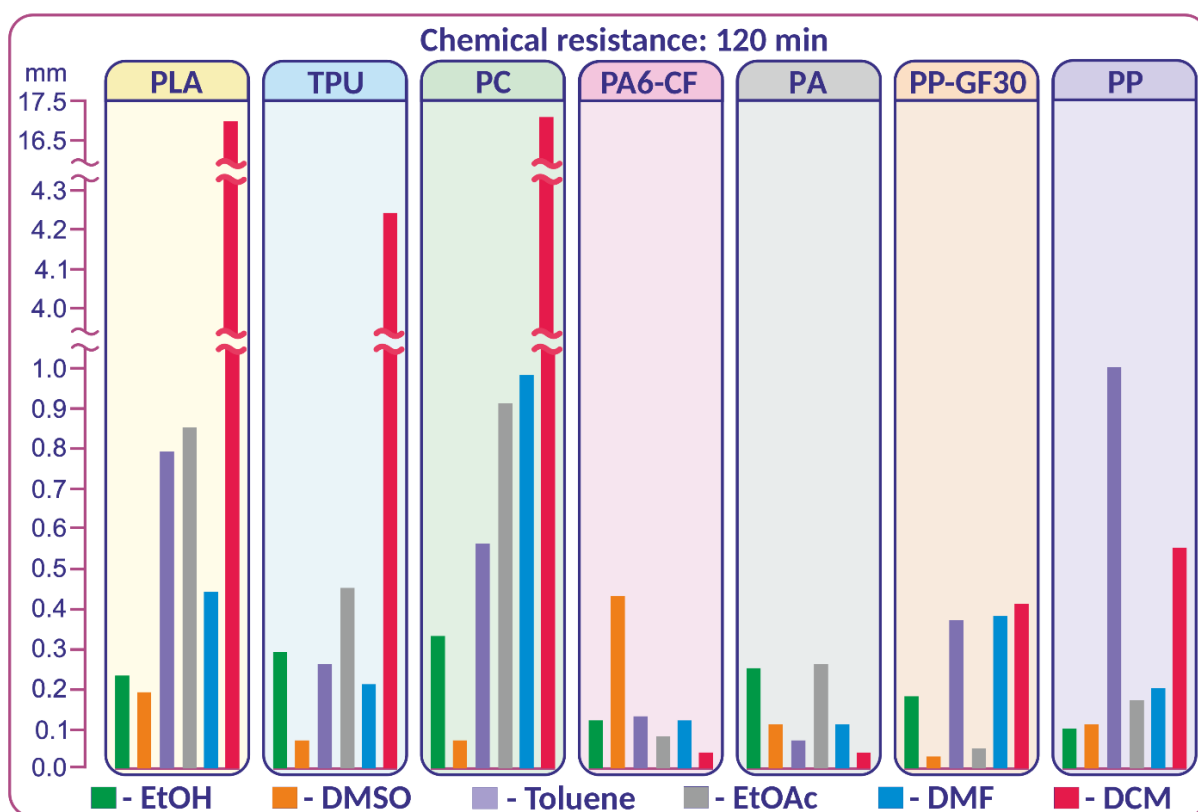

**Figure S21.** Diagram with quantitative calculations of the chemical resistance of 3D printed samples when exposed to various solvents for 120 minutes.

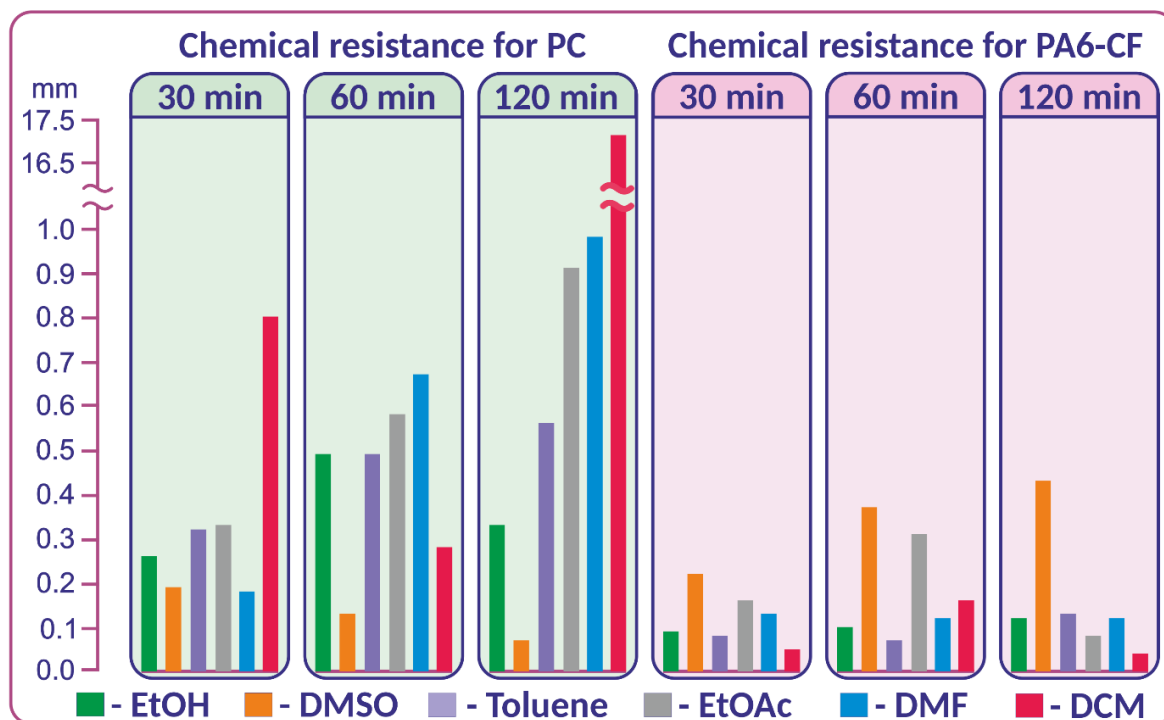

**Figure S22.** Comparative diagram with quantitative calculations of the chemical resistance of 3D printed samples from PC and PA6-CF when exposed to various solvents during different exposure times.

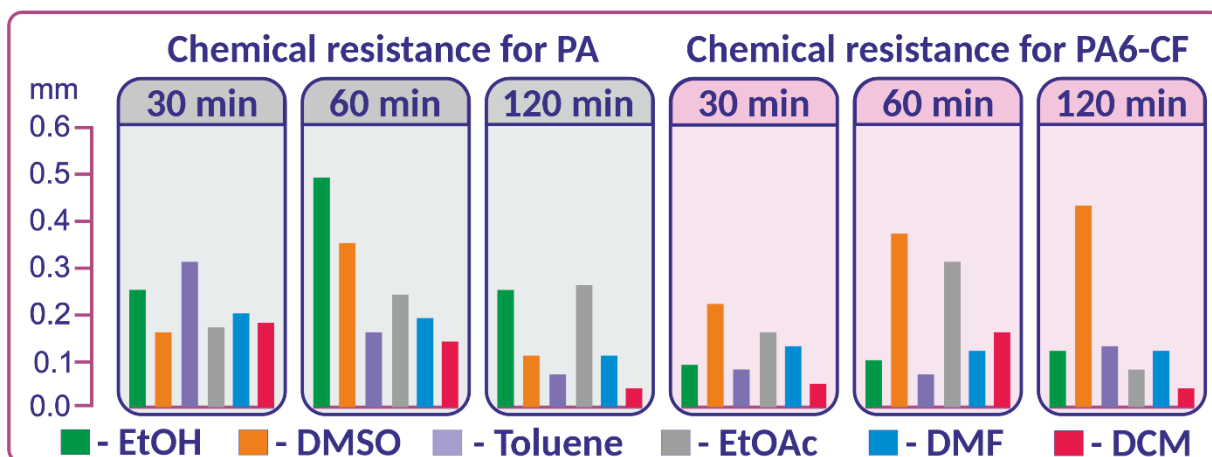

**Figure S23.** Comparative diagram with quantitative calculations of the chemical resistance of 3D printed samples from PA and PA6-CF when exposed to various solvents during different exposure times.

### 3. Thermal resistance of FFF parts

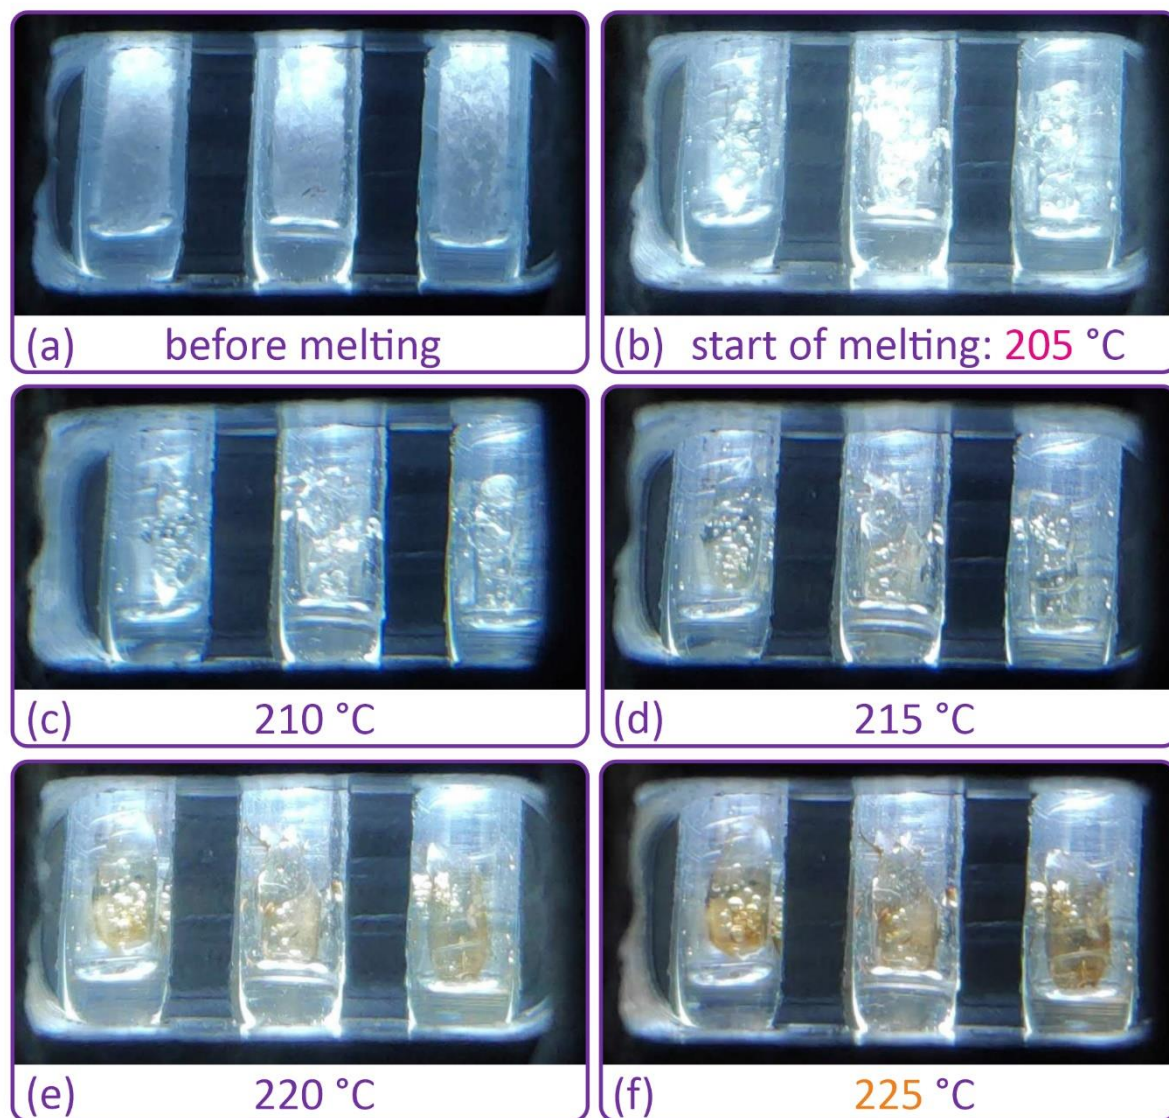

**Figure S24.** Melting point of PA measured using a melting-point apparatus: (a) – samples before melting; (b) – samples at the moment of the beginning of melting with the corresponding temperature; (c-e) – samples during further melting with the corresponding temperatures; (f) – samples at the time of melting at the temperature established during the test on the tile.

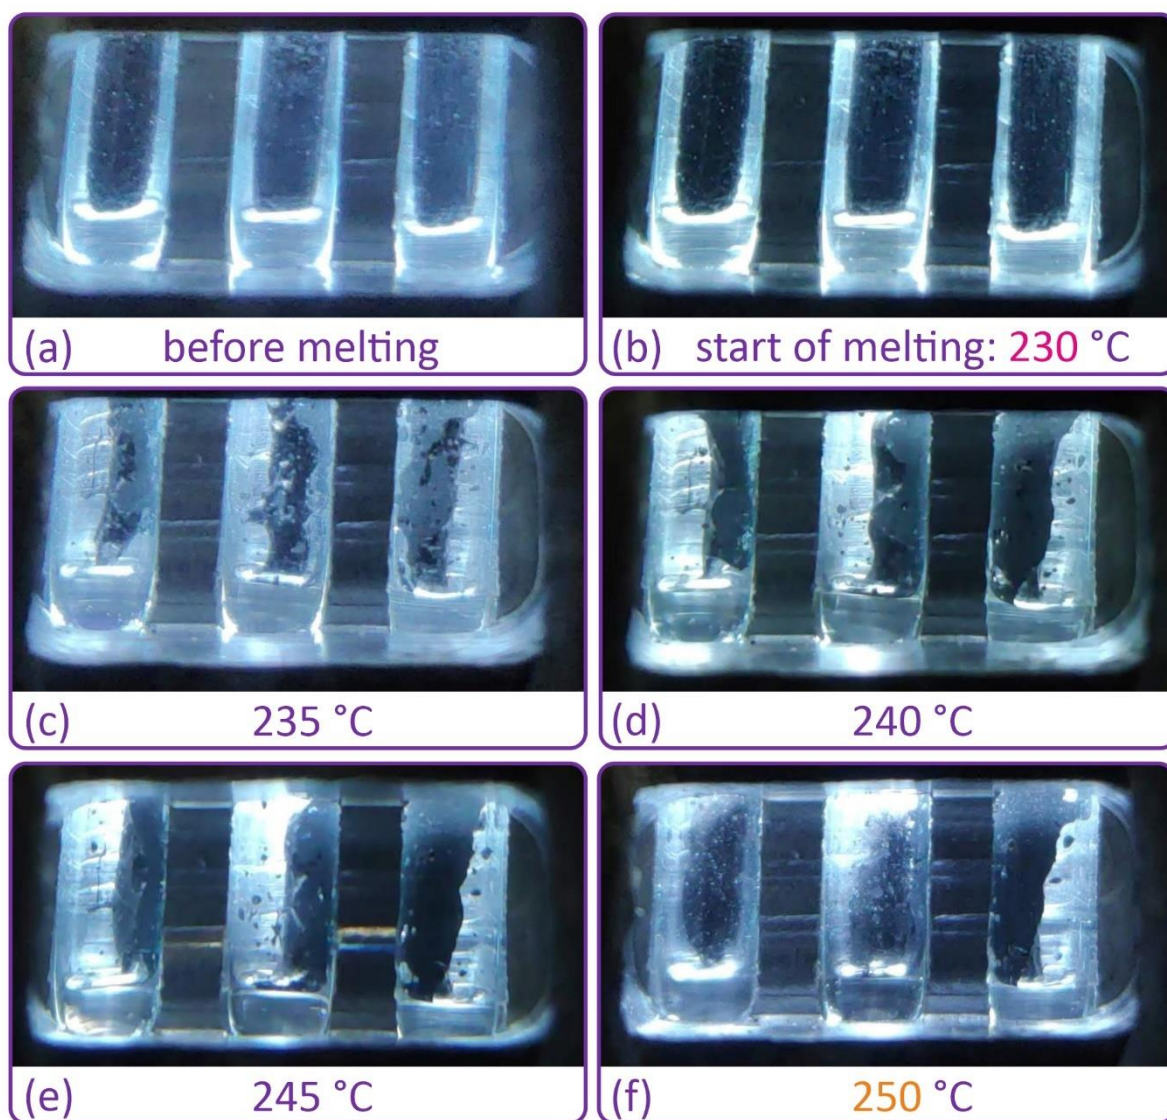

**Figure S25.** Melting point of PA6-CF measured using a melting-point apparatus: (a) – samples before melting; (b) – samples at the moment of the beginning of melting with the corresponding temperature; (c-e) – samples during further melting with the corresponding temperatures; (f) – samples at the moment of melting at the temperature established during the test on the tile.

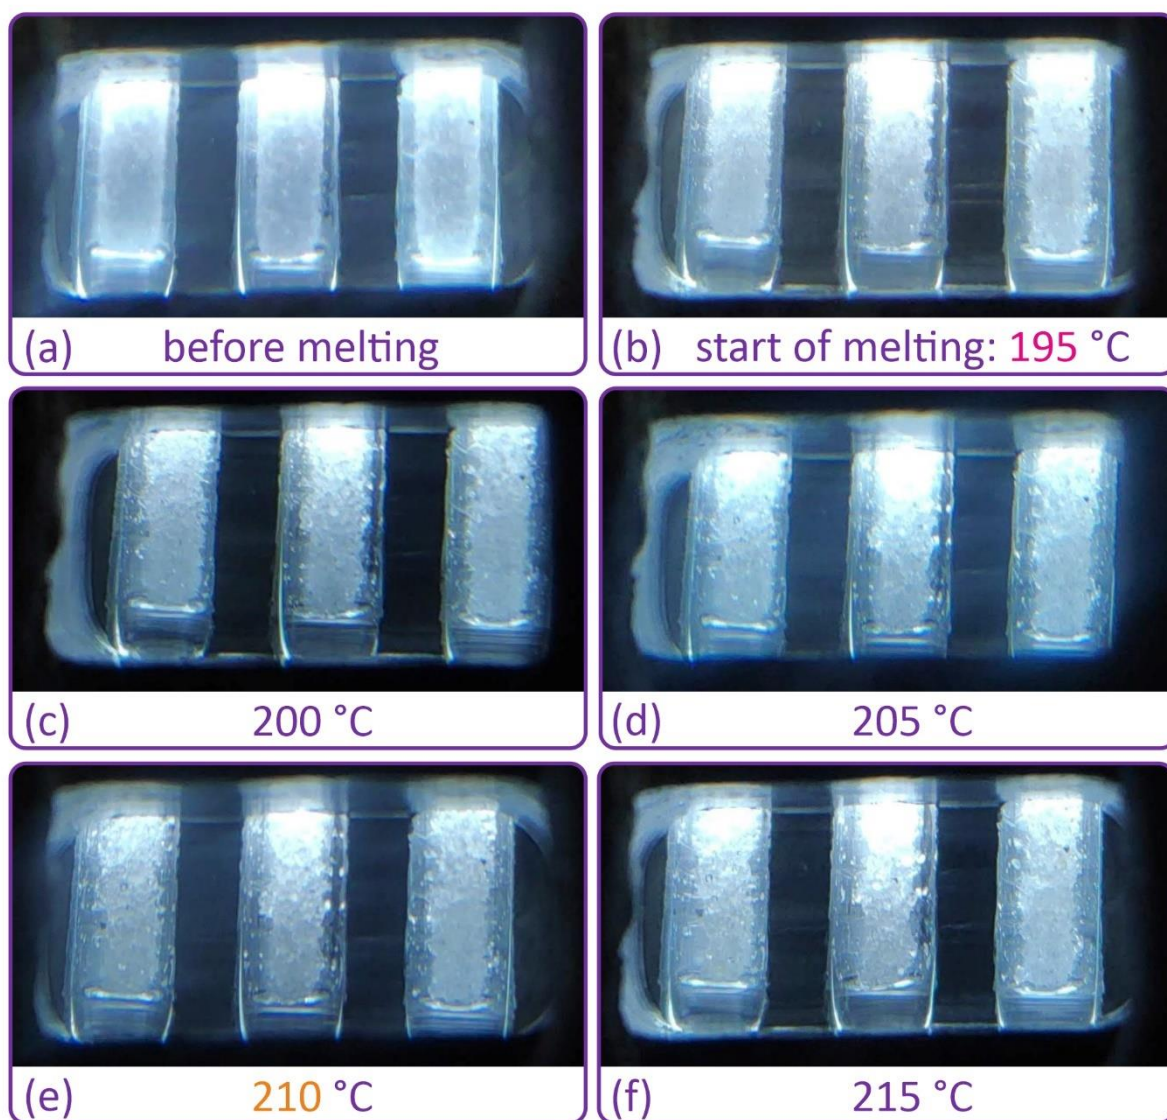

**Figure S26.** Melting point of PC+ measured using a melting-point apparatus: (a) – samples before melting; (b) – samples at the moment of the beginning of melting with the corresponding temperature; (c), (d) – samples during further melting with the corresponding temperatures; (e) – samples at the time of melting at the temperature established during the test on the tile; (f) – samples during further melting with the corresponding temperature.

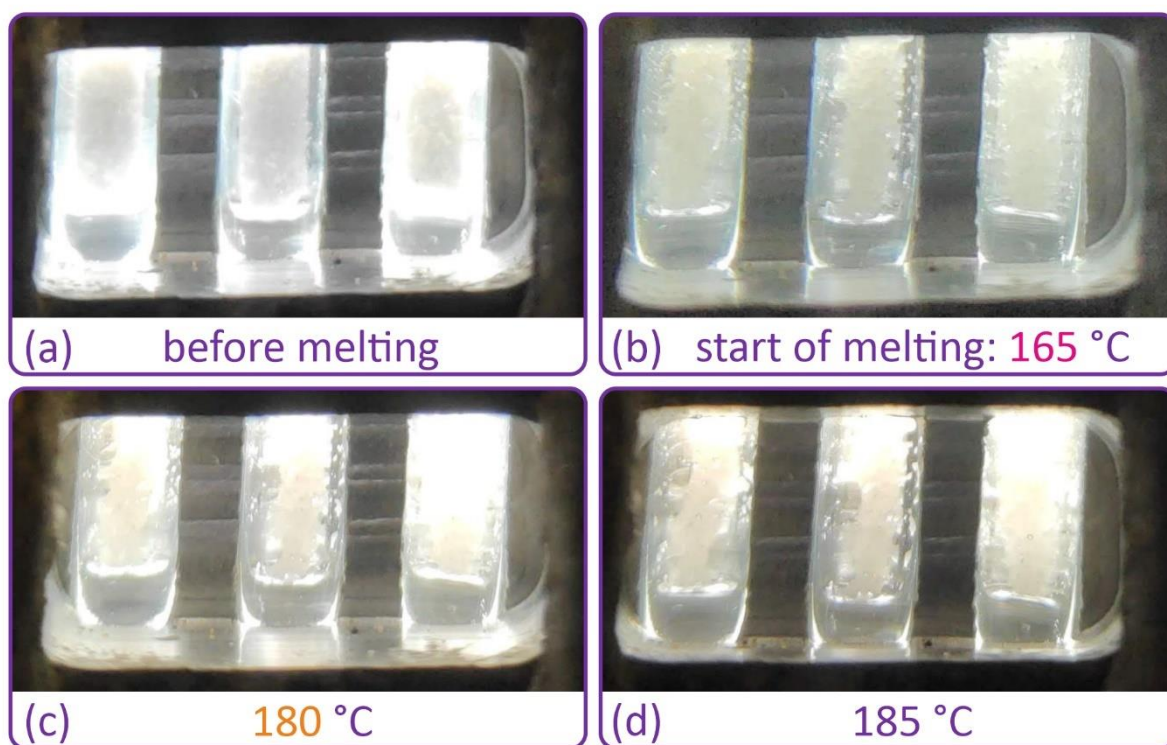

**Figure S27.** Melting temperature of PLA+ measured using a melting-point apparatus: (a) – samples before melting; (b) – samples at the moment of the beginning of melting with the corresponding temperature; (c) – samples at the moment of melting at the temperature established during the test on the tile; (d) – samples during further melting with the corresponding temperature.

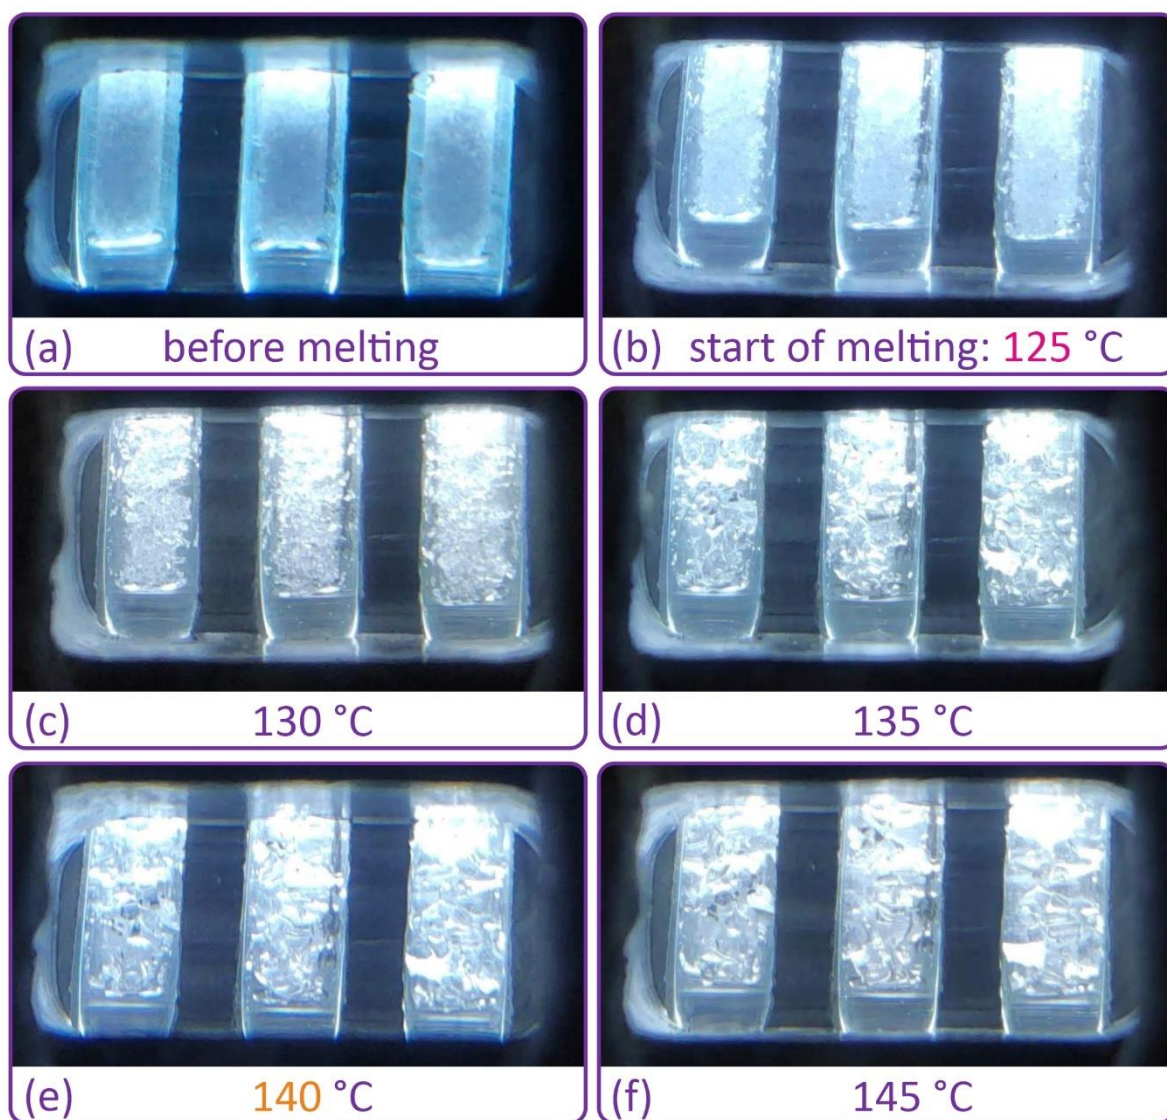

**Figure S28.** Melting temperature of PP measured using a melting-point apparatus: (a) – samples before melting; (b) – samples at the moment of the beginning of melting with the corresponding temperature; (c), (d) – samples during further melting with the corresponding temperatures; (e) – samples at the time of melting at the temperature established during the test on the tile; (f) – samples during further melting with the corresponding temperature.

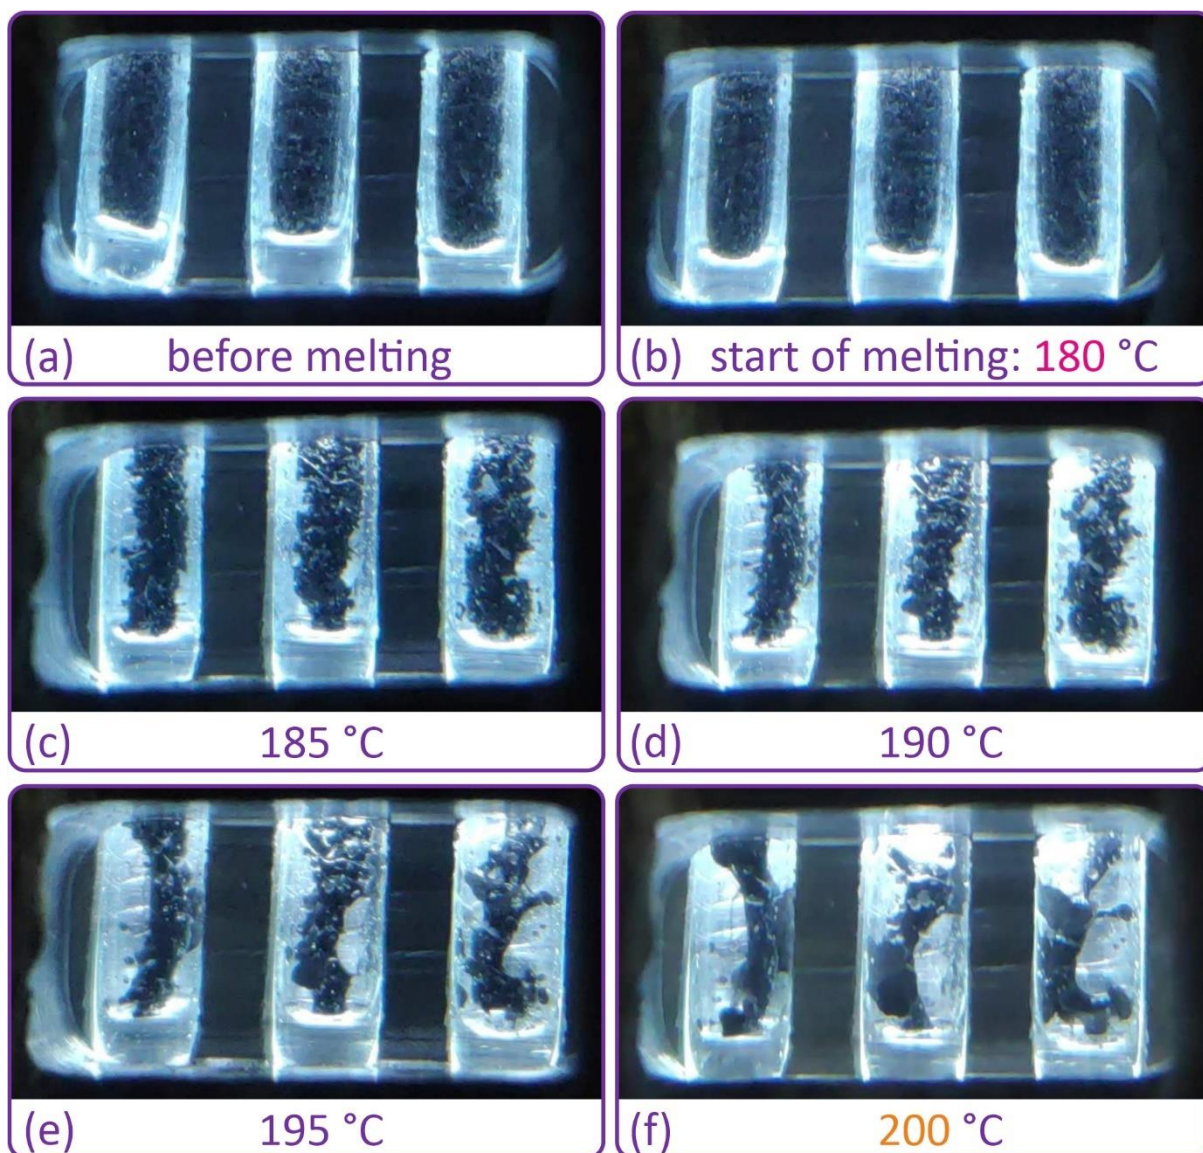

**Figure S29.** Melting point of PP-GF measured using a melting-point apparatus: (a) – samples before melting; (b) – samples at the moment of the beginning of melting with the corresponding temperature; (c-e) – samples during further melting with the corresponding temperatures; (f) – samples at the time of melting at the temperature established during the test on the tile.

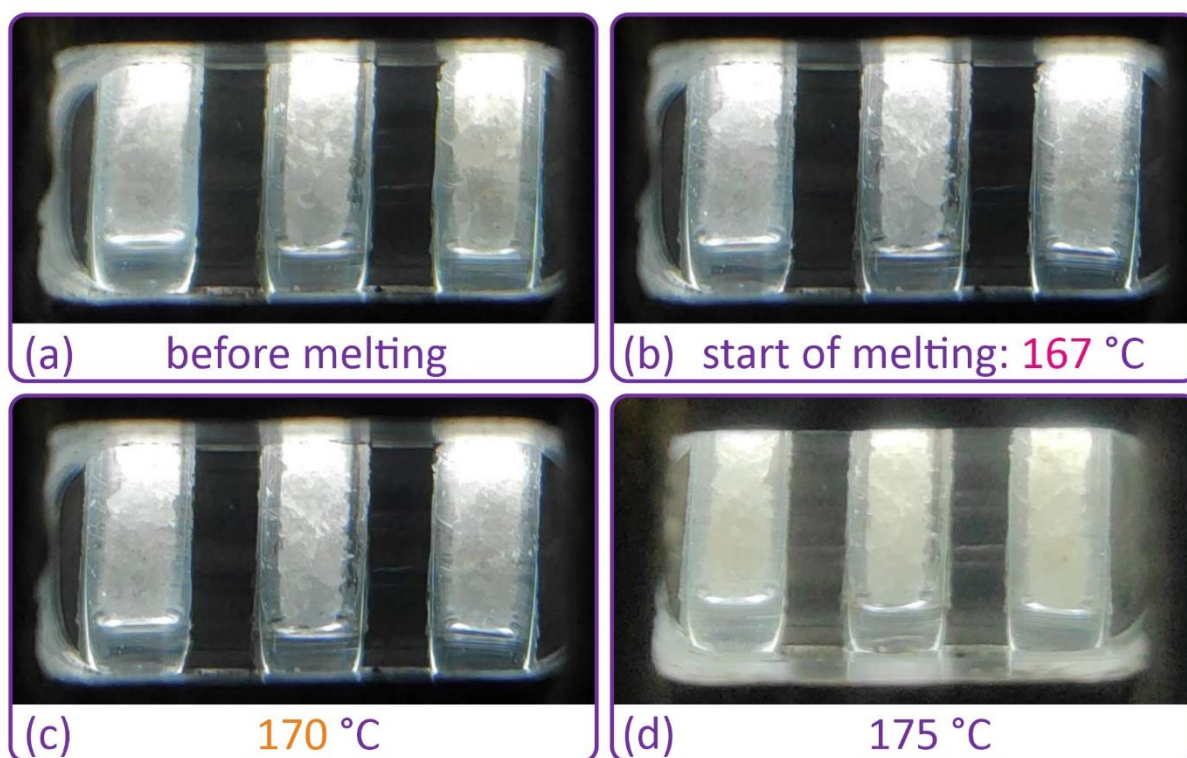

**Figure S30.** Melting point of TPU measured using a melting-point apparatus: (a) – samples before melting; (b) – samples at the moment of the beginning of melting with the corresponding temperature; (c) – samples at the moment of melting at the temperature established during the test on the tile; (d) – samples during further melting with the corresponding temperature.

#### 4. Tensile testing

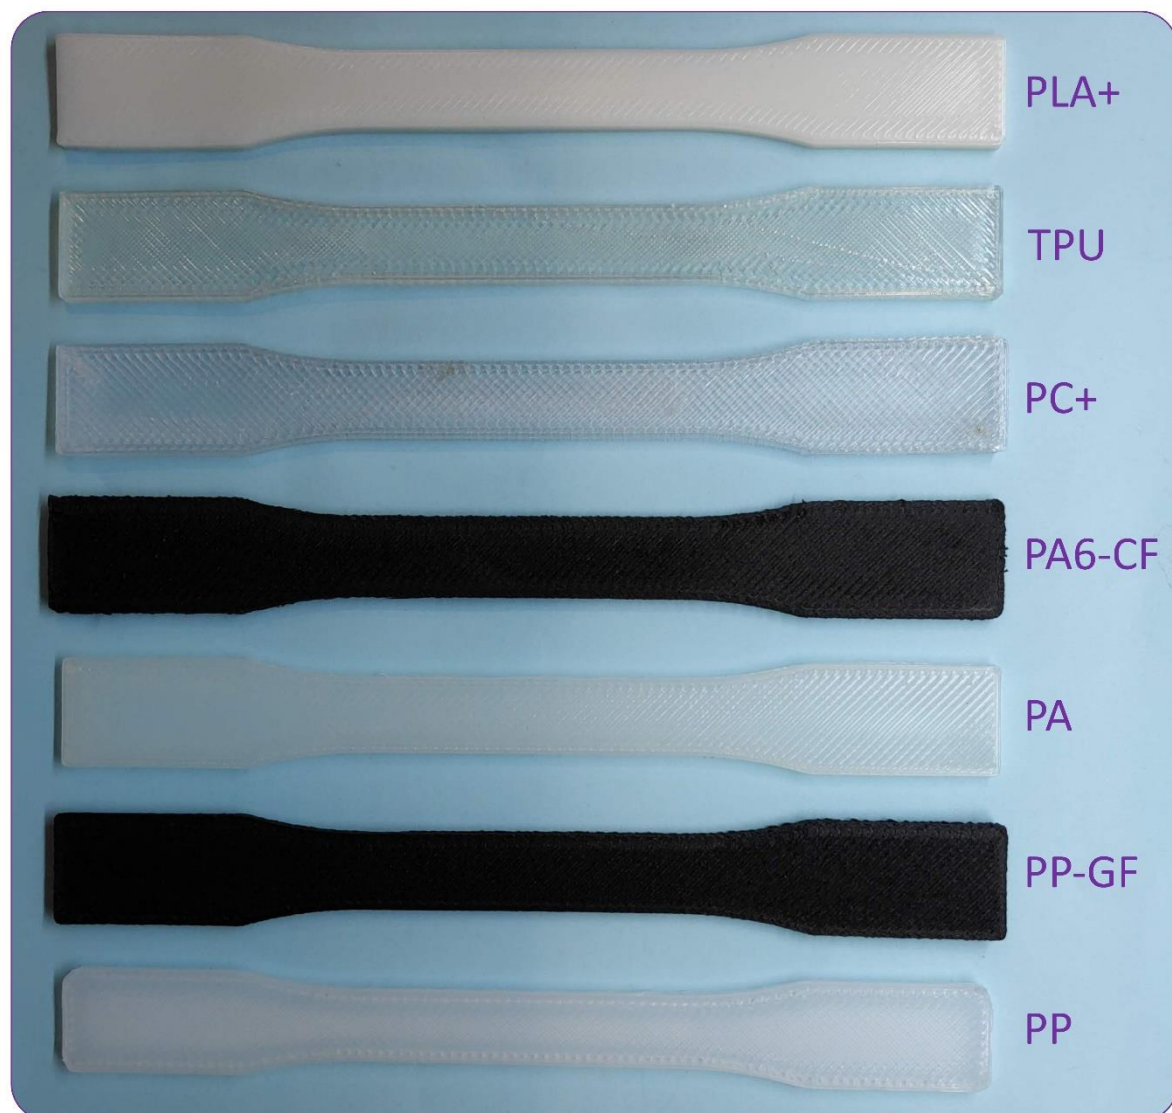

**Figure S31.** FFF samples for tensile testing with infill angle relative to the direction of load application equal to 45°.

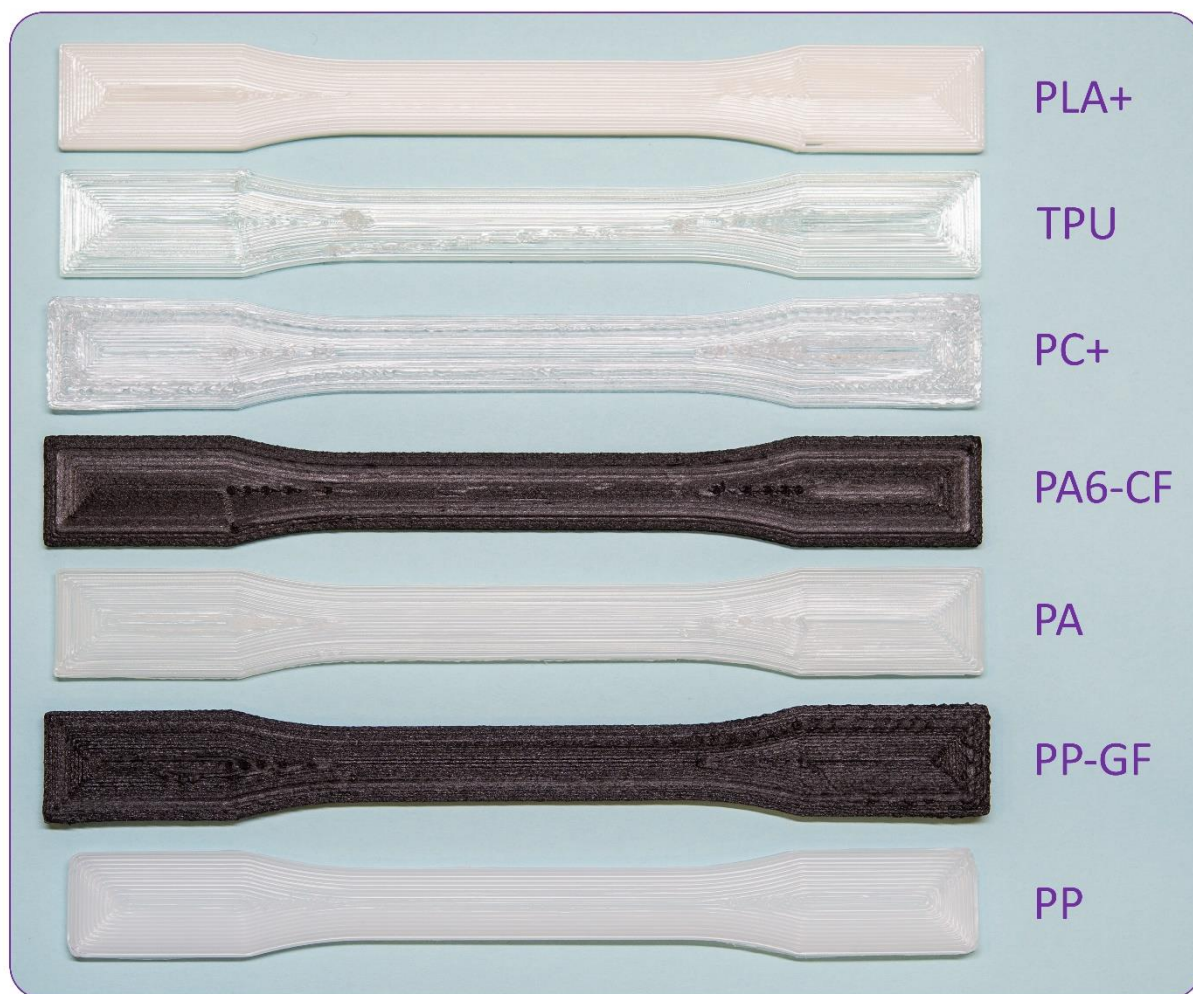

**Figure S32.** FFF samples for tensile testing with infill angle relative to the direction of load application equal to 0°.

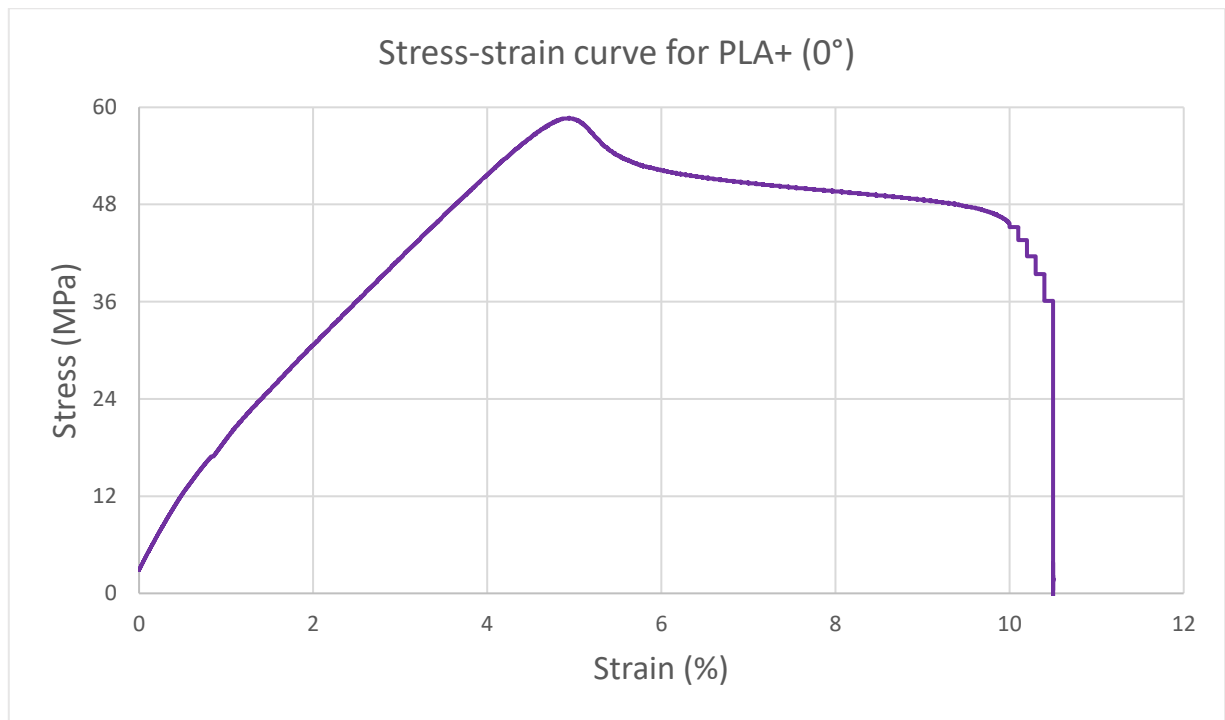

**Figure S33.** Stress-strain graph for a PLA+ FFF single sample with a print orientation angle equal to 0°.

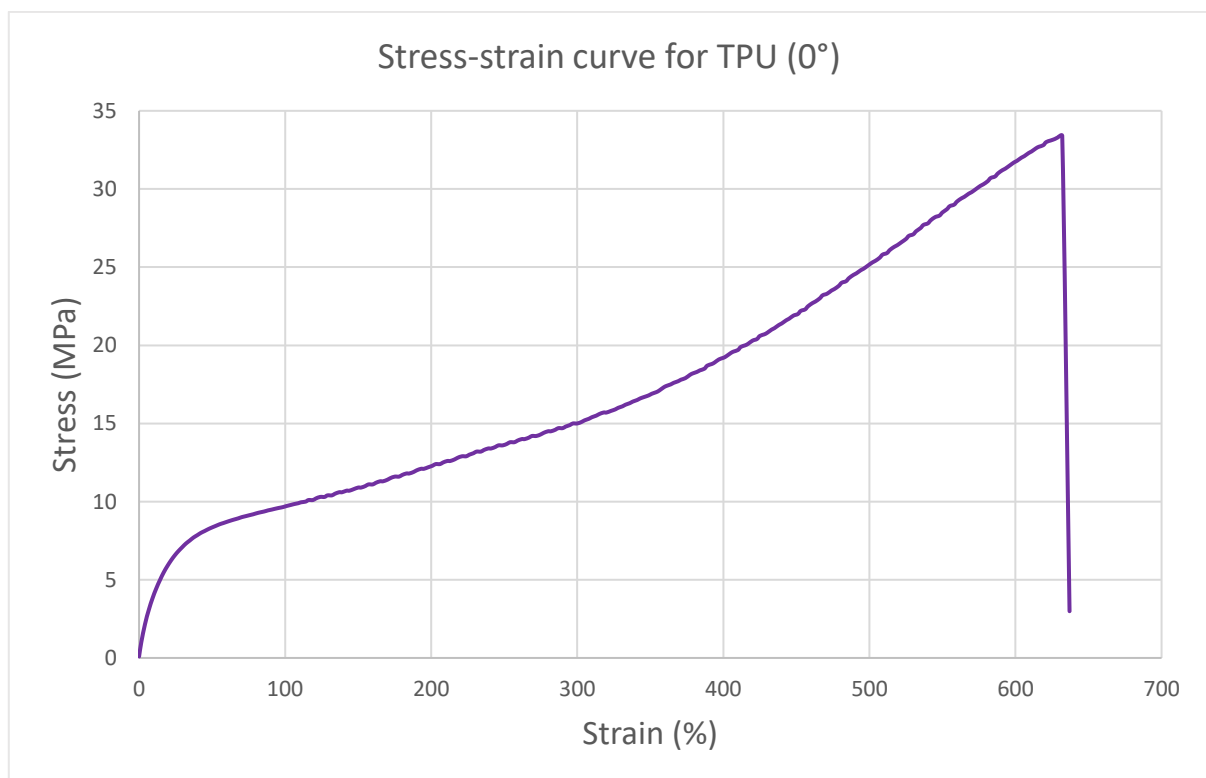

**Figure S34.** Stress-strain graph for a TPU FFF single sample with a print orientation angle equal to 0°.

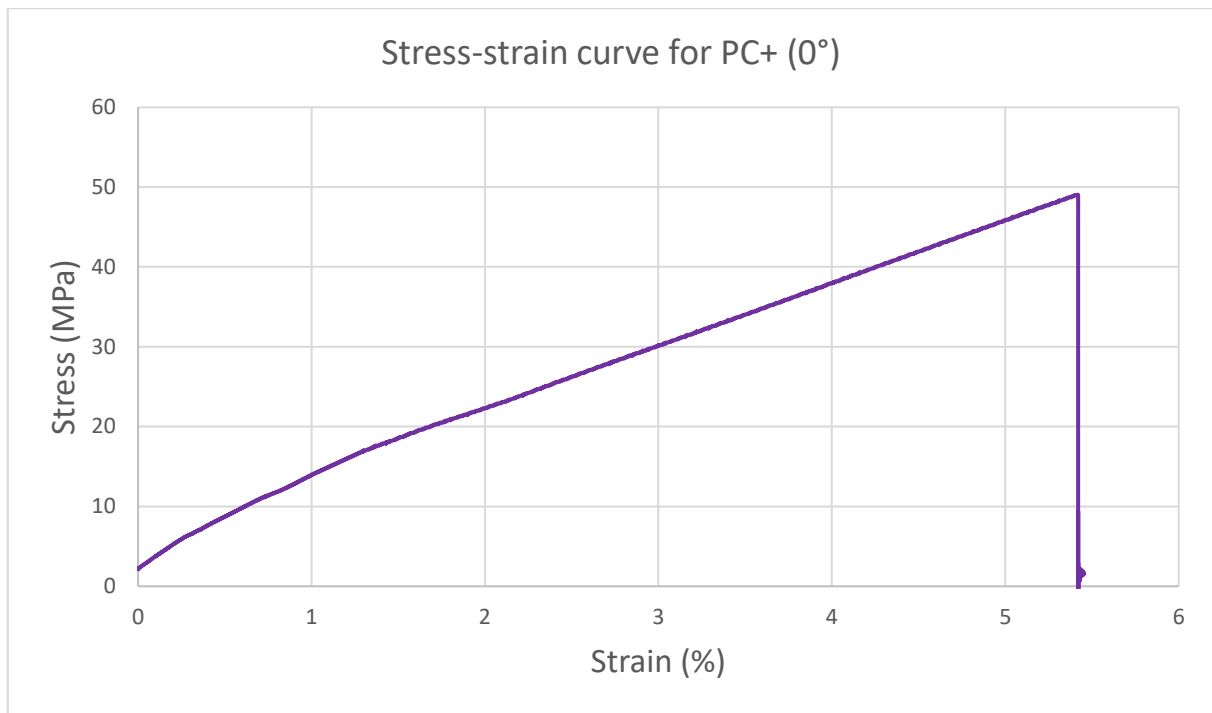

**Figure S35.** Stress-strain graph for a PC+ FFF single sample with a print orientation angle equal to 0°.

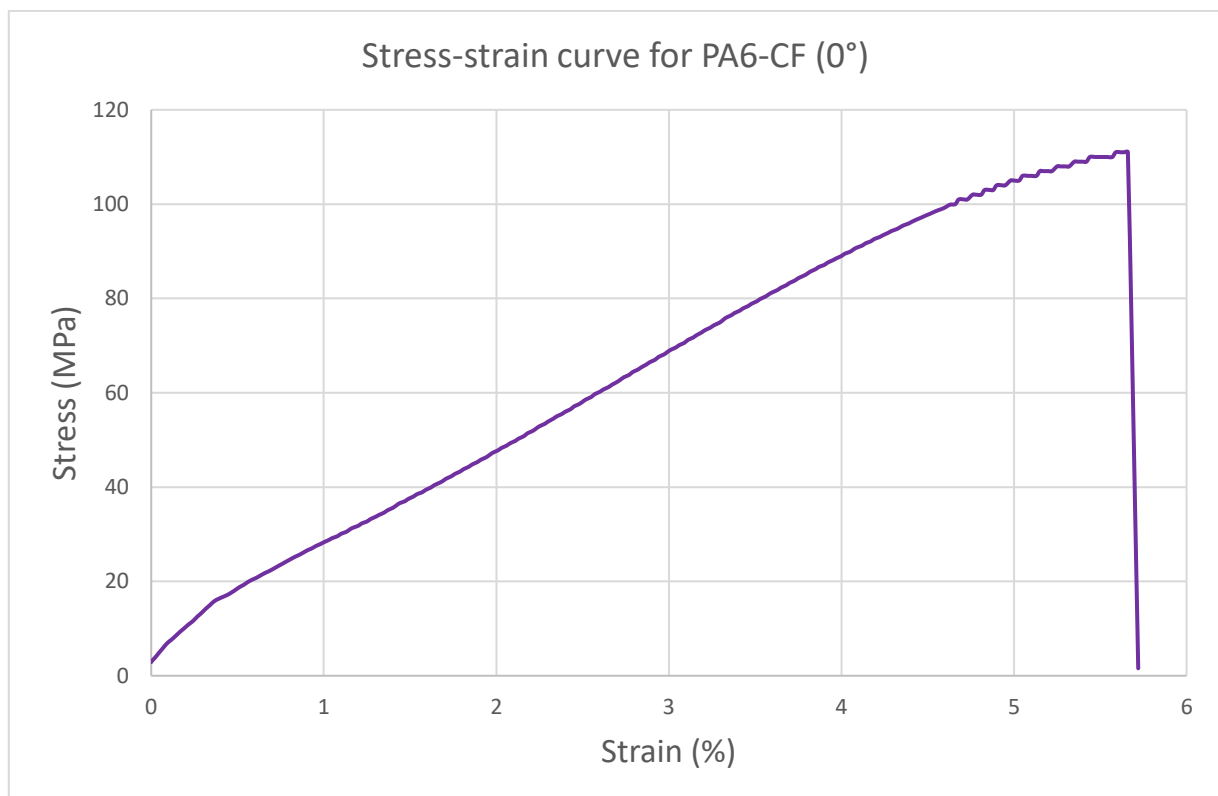

**Figure S36.** Stress-strain graph for a PA6-CF FFF single sample with a print orientation angle equal to 0°.

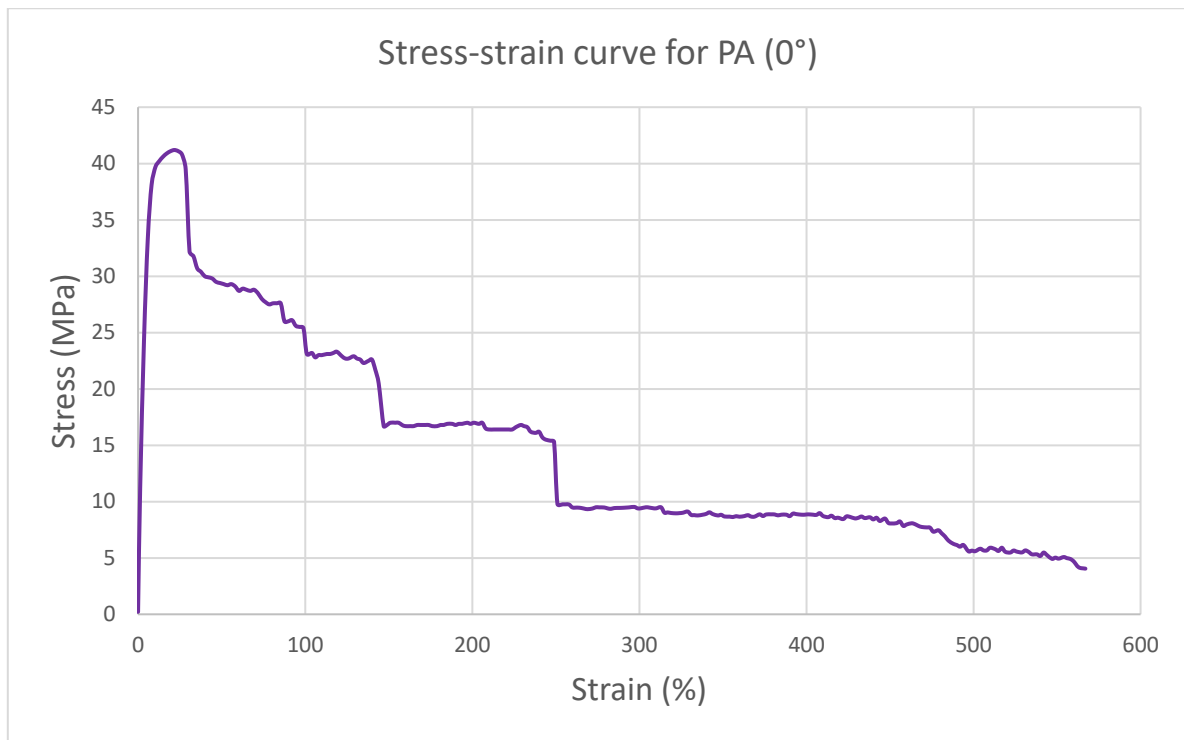

**Figure S37.** Stress-strain graph for a PA FFF single sample with a print orientation angle equal to 0°.

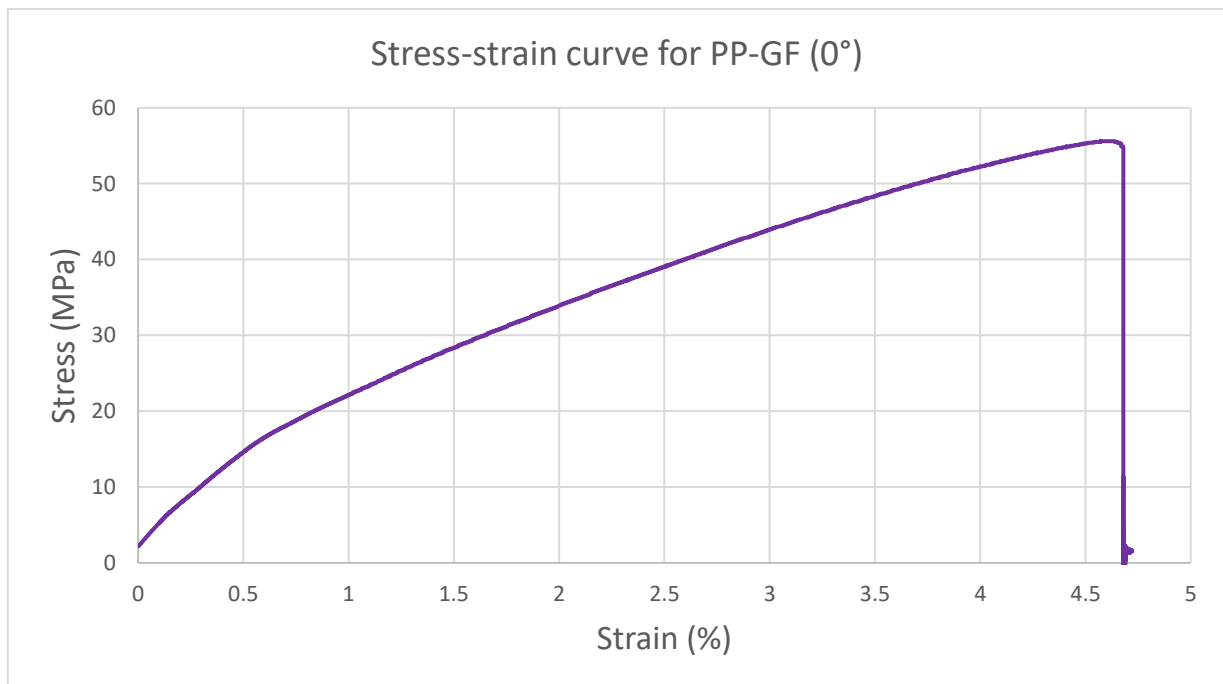

**Figure S38.** Stress-strain graph for a PP-GF FFF single sample with a print orientation angle equal to 0°.

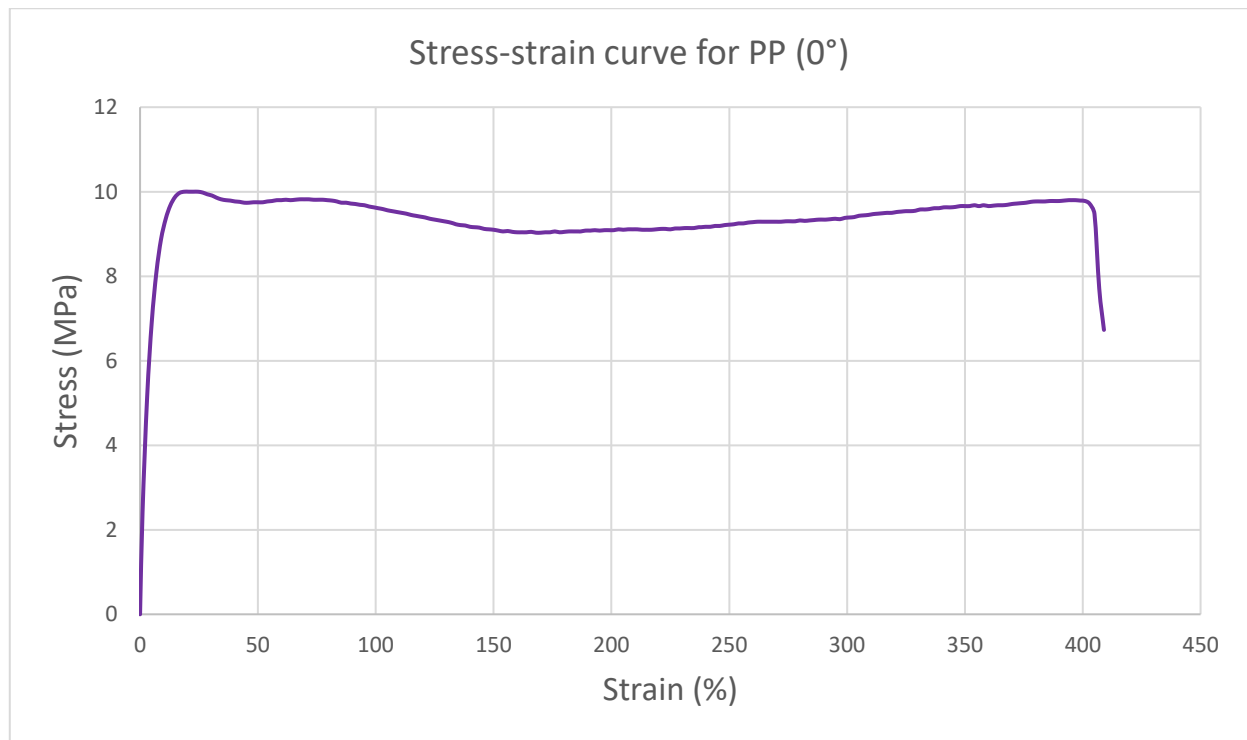

**Figure S39.** Stress-strain graph for a PP FFF single sample with a print orientation angle equal to 0°.

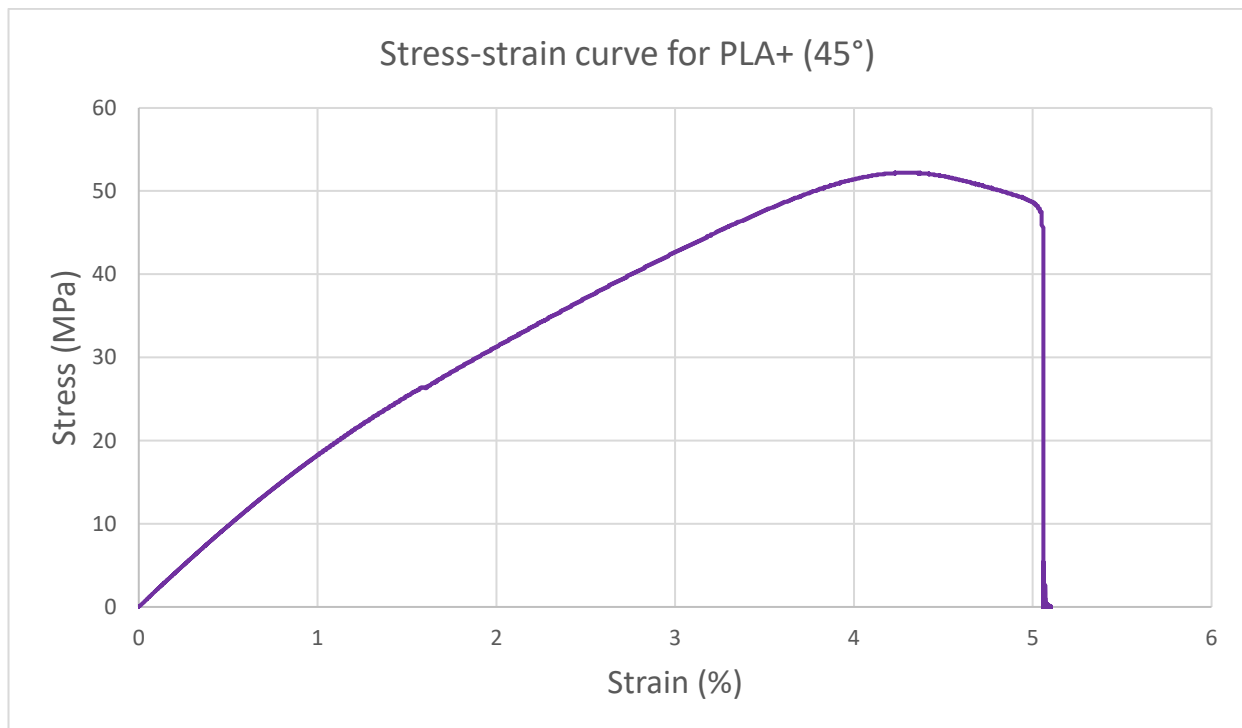

**Figure S40.** Stress-strain graph for a PLA+ FFF single sample with a print orientation angle equal to 45°.

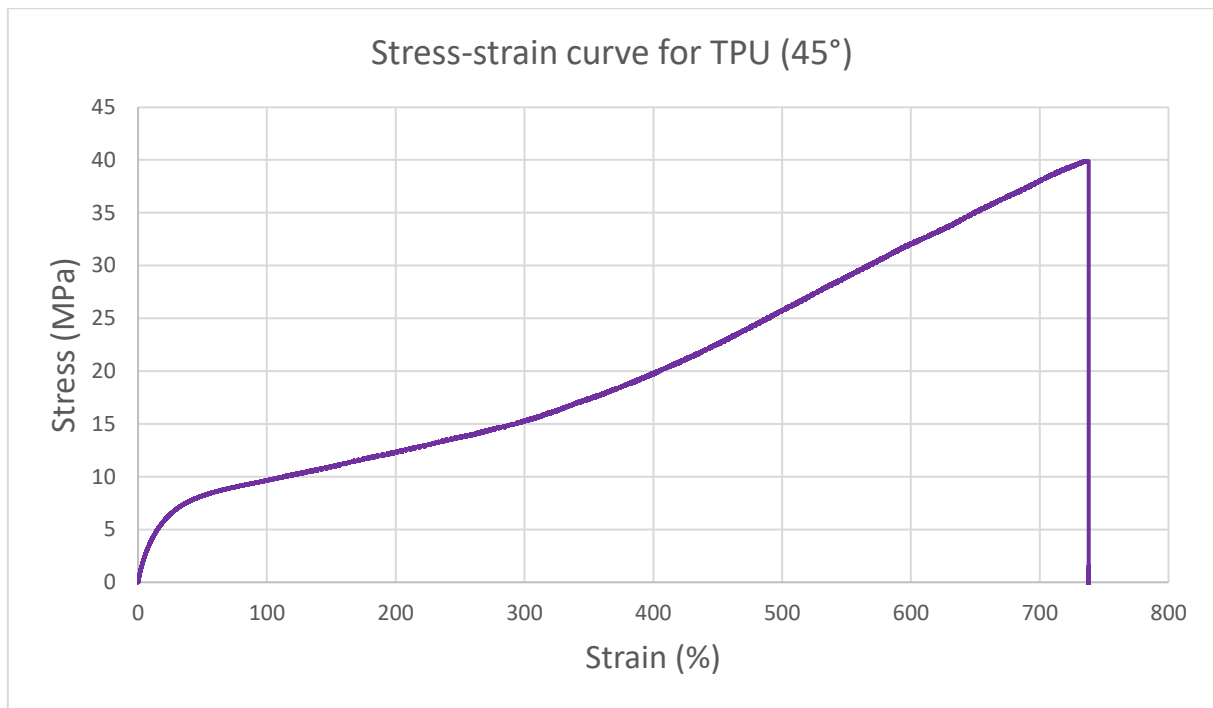

**Figure S41.** Stress-strain graph for a TPU FFF single sample with a print orientation angle equal to 45°.

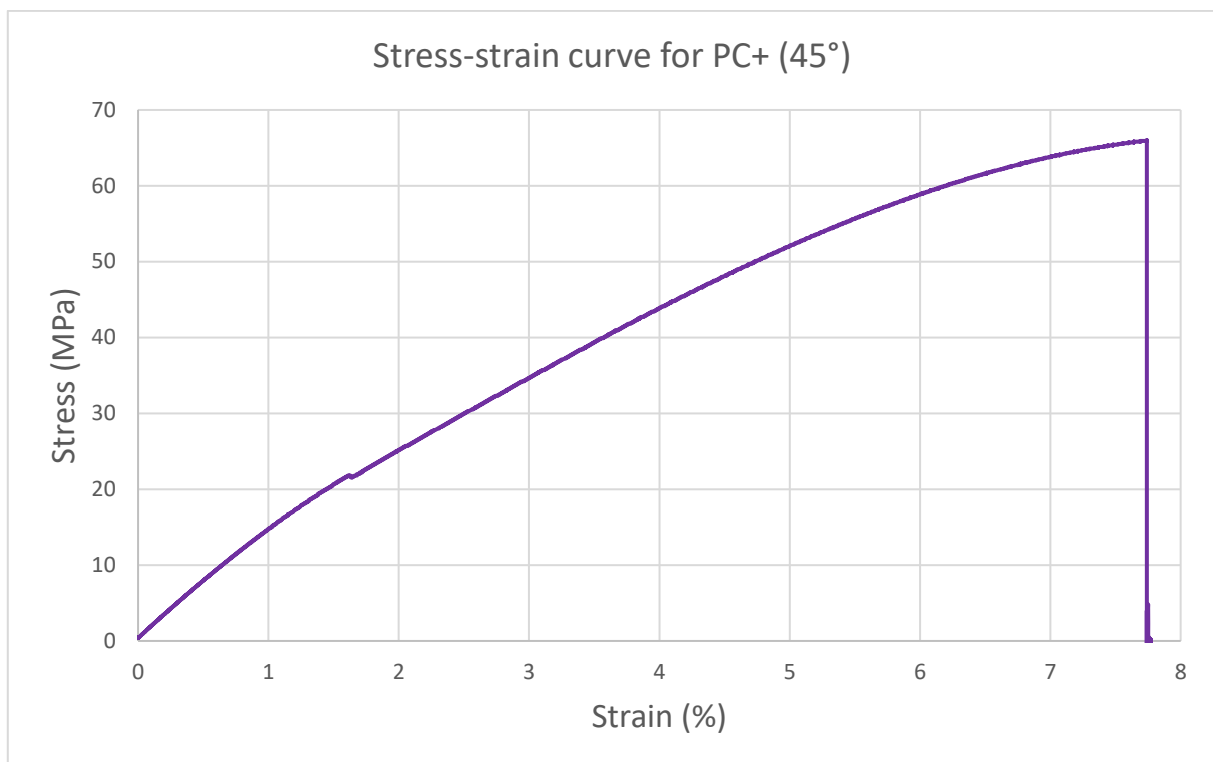

**Figure S42.** Stress-strain graph for a PC+ FFF single sample with a print orientation angle equal to 45°.

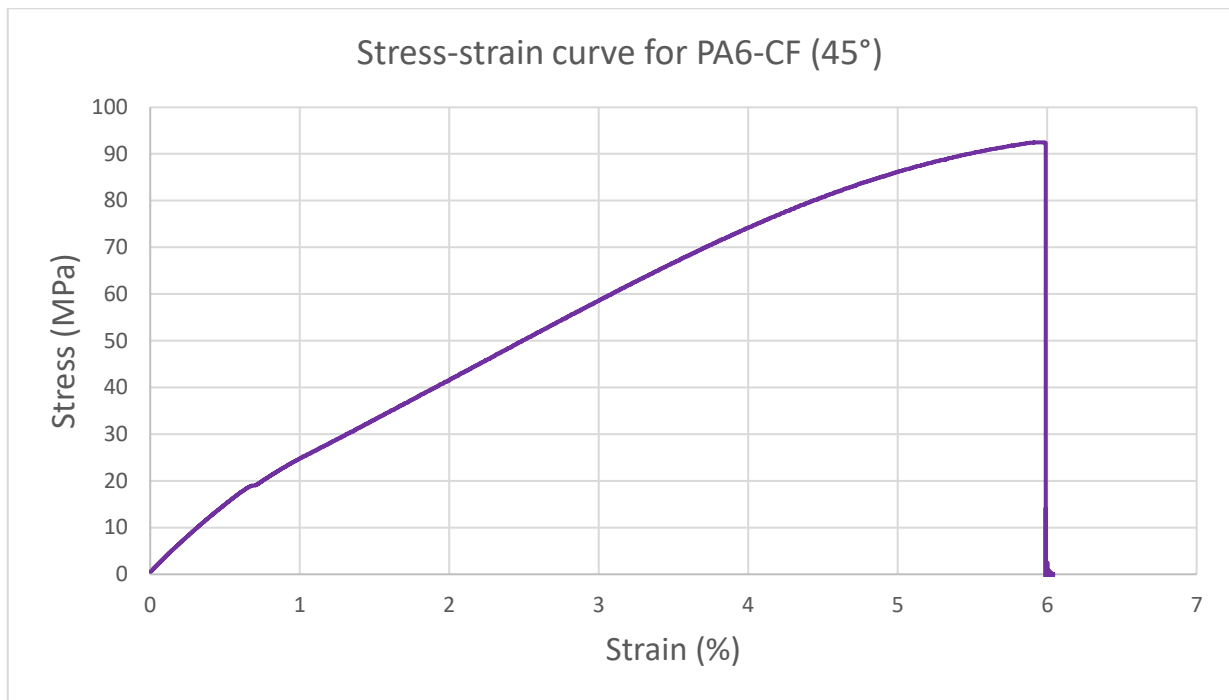

**Figure S43.** Stress-strain graph for a PA6-CF FFF single sample with a print orientation angle equal to 45°.

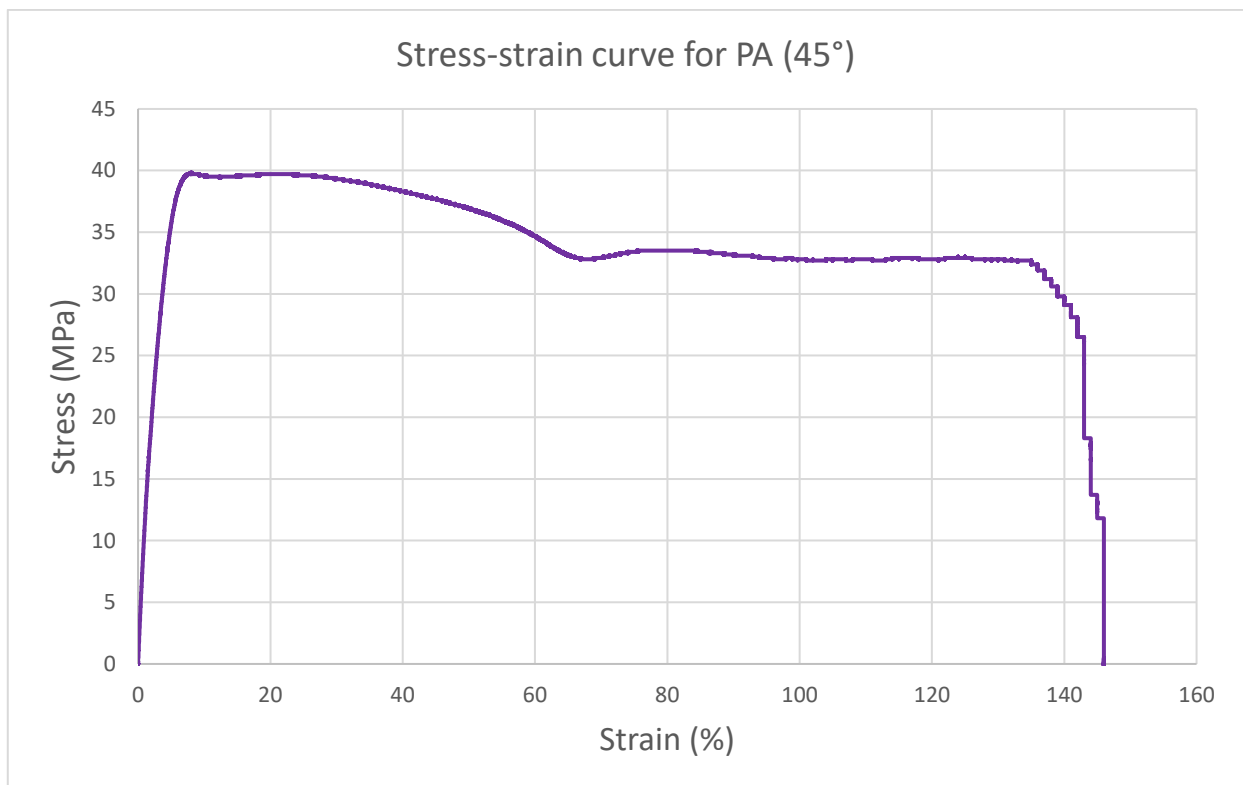

**Figure S44.** Stress-strain graph for a PA FFF single sample with a print orientation angle equal to 45°.

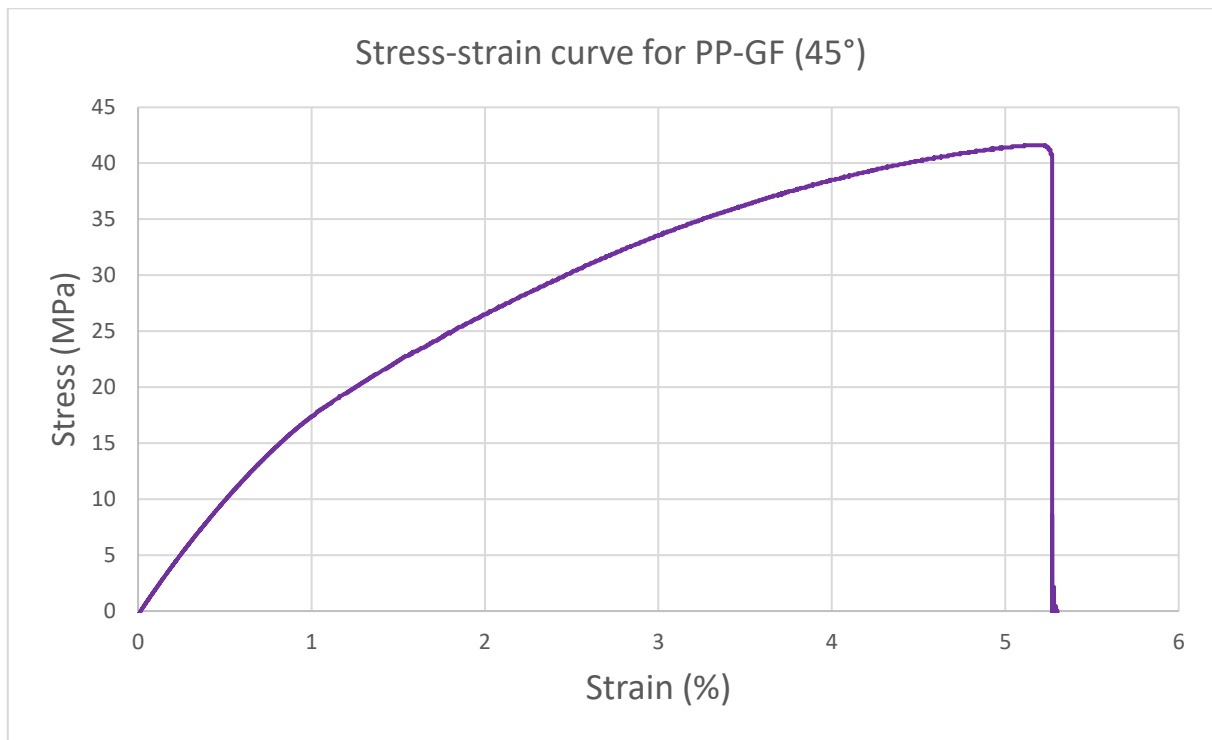

**Figure S45.** Stress-strain graph for a PP-GF FFF single sample with a print orientation angle equal to 45°.

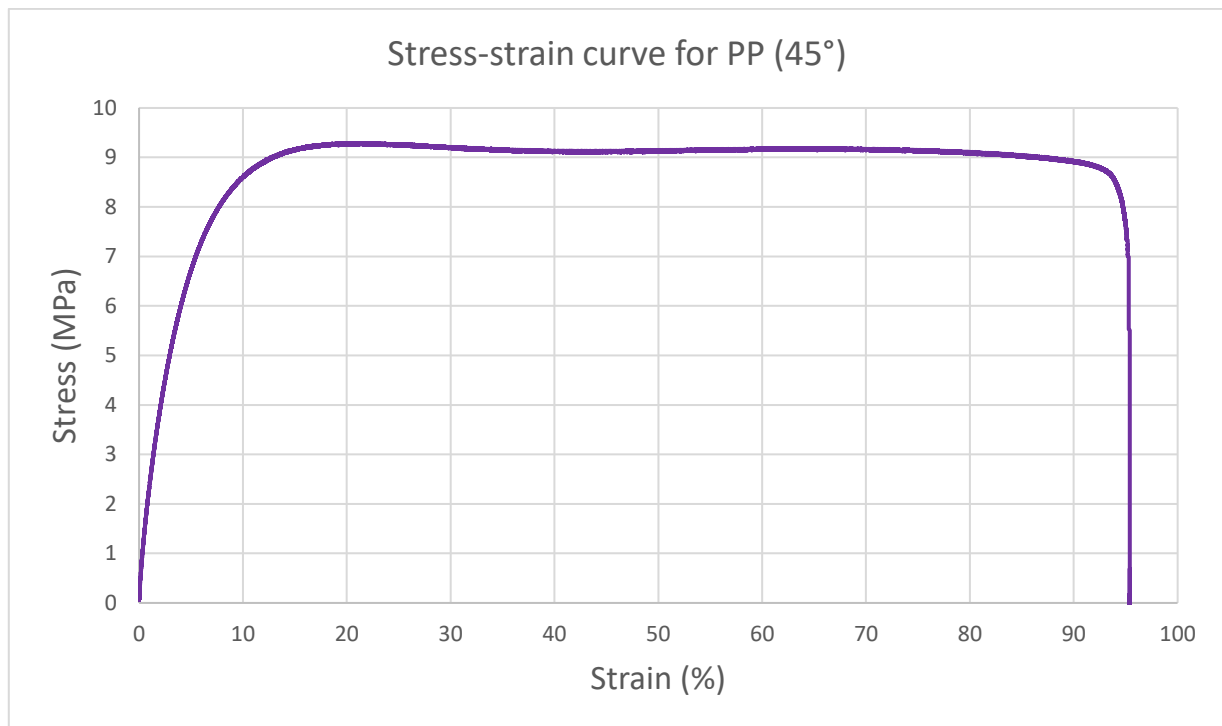

**Figure S46.** Stress-strain graph for a PP FFF single sample with a print orientation angle equal to 45°.

## 5. Study of the impermeability of the FFF parts

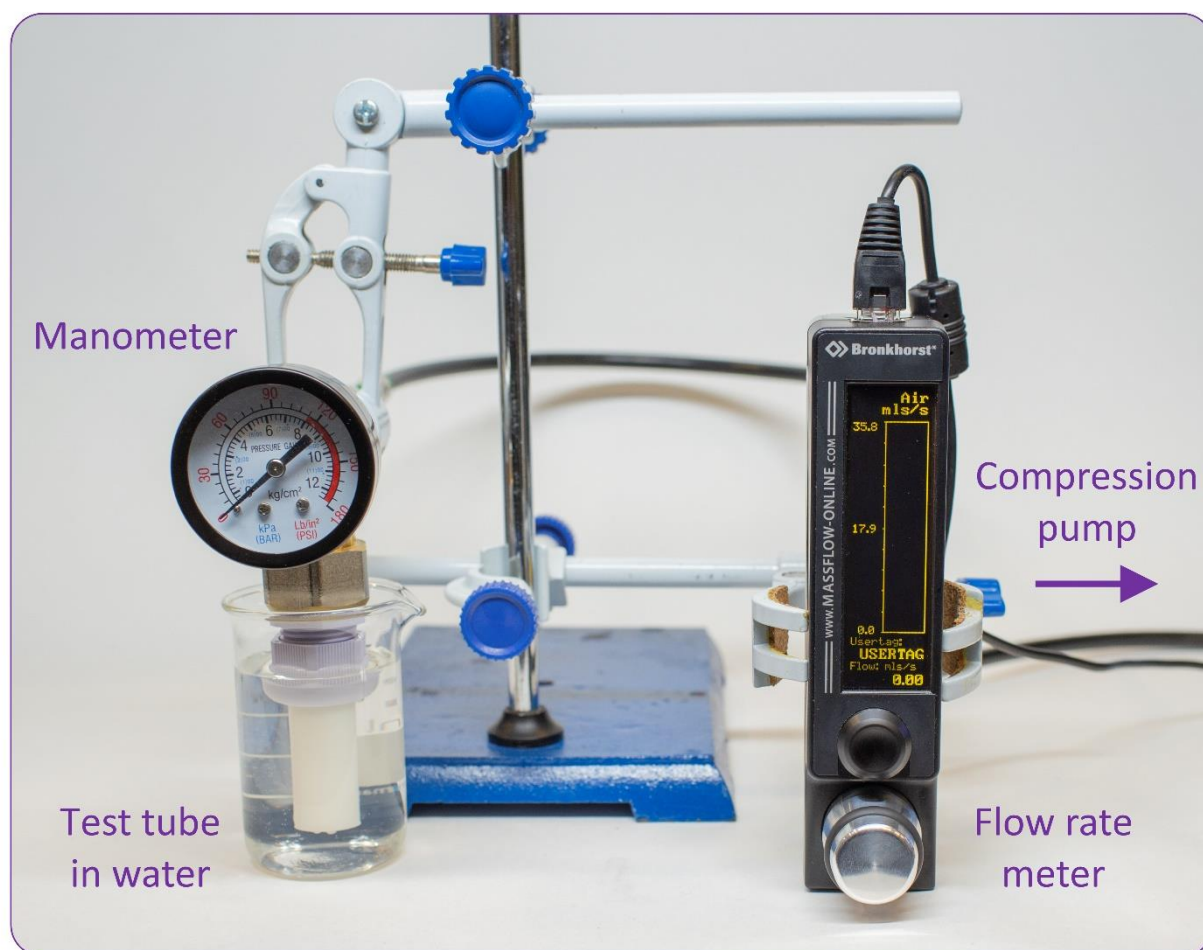

**Figure S47.** Installation for determining the microporosity of products.

**Table S3.** Influence of printing parameters on the impermeability and weight of test tubes printed from PLA+.

| Extrusion multiplier (k-value) | Extrusion width (w) | Impermeability | Sample weight (g) | Flow rate meter readings (mL/sec) |
|--------------------------------|---------------------|----------------|-------------------|-----------------------------------|
| <b>PLA+</b>                    |                     |                |                   |                                   |
| 0.85                           | 0.5                 | -              | 4.75              | 46.90*                            |
| 0.85                           | 0.5                 | -              | 4.75              | 46.90                             |
| 0.85                           | 0.5                 | -              | 4.82              | 46.90                             |
| <b>mean value</b>              |                     | -              | <b>4.77</b>       | <b>46.90</b>                      |
| 0.95                           | 0.5                 | -              | 5.31              | 22.03                             |
| 0.95                           | 0.5                 | -              | 5.31              | 25.79                             |
| 0.95                           | 0.5                 | -              | 5.35              | 21.25                             |
| <b>mean value</b>              |                     | -              | <b>5.32</b>       | <b>23.02</b>                      |
| 1.05                           | 0.5                 | -              | 5.87              | 4.85                              |

|            |     |   |             |                    |
|------------|-----|---|-------------|--------------------|
| 1.05       | 0.5 | - | 5.88        | 7.51               |
| 1.05       | 0.5 | - | 5.95        | 0.59               |
| mean value |     | - | <b>5.90</b> | <b>4.32</b>        |
| 1.1        | 0.5 | - | 6.14        | 1.97               |
| 1.1        | 0.5 | - | 6.14        | 3.00               |
| 1.1        | 0.5 | - | 6.23        | 0.00               |
| mean value |     | - | <b>6.17</b> | <b>1.66</b>        |
| 0.85       | 0.6 | - | 5.70        | 0.20               |
| 0.85       | 0.6 | - | 5.63        | 5.47               |
| 0.85       | 0.6 | - | 5.64        | 4.07               |
| mean value |     | - | <b>5.66</b> | <b>3.25</b>        |
| 0.95       | 0.6 | - | 6.29        | 0.00               |
| 0.95       | 0.6 | - | 6.30        | 0.00               |
| 0.95       | 0.6 | + | 6.37        | 0.00               |
| mean value |     | - | <b>6.32</b> | <b>&gt; 0.00**</b> |
| 1.05       | 0.6 | + | 6.95        | 0.00               |
| 1.05       | 0.6 | + | 6.94        | 0.00               |
| 1.05       | 0.6 | + | 7.05        | 0.00               |
| mean value |     | + | <b>6.98</b> | <b>0.00</b>        |
| 1.1        | 0.6 | + | 7.26        | 0.00               |
| 1.1        | 0.6 | + | 7.24        | 0.00               |
| 1.1        | 0.6 | + | 7.40        | 0.00               |
| mean value |     | + | <b>7.30</b> | <b>0.00</b>        |
| 0.85       | 0.7 | - | 5.64        | 1.25               |
| 0.85       | 0.7 | - | 5.63        | 0.79               |
| 0.85       | 0.7 | - | 5.72        | 0.18               |
| mean value |     | - | <b>5.66</b> | <b>0.00</b>        |
| 0.95       | 0.7 | + | 6.31        | 0.00               |
| 0.95       | 0.7 | + | 6.32        | 0.00               |
| 0.95       | 0.7 | + | 6.40        | 0.00               |
| mean value |     | + | <b>6.34</b> | <b>0.00</b>        |
| 1.05       | 0.7 | + | 6.95        | 0.00               |
| 1.05       | 0.7 | + | 6.98        | 0.00               |
| 1.05       | 0.7 | + | 7.07        | 0.00               |
| mean value |     | + | <b>7.00</b> | <b>0.00</b>        |
| 1.1        | 0.7 | + | 7.27        | 0.00               |
| 1.1        | 0.7 | + | 7.26        | 0.00               |
| 1.1        | 0.7 | + | 7.38        | 0.00               |
| mean value |     | + | <b>7.30</b> | <b>0.00</b>        |

\*upper limit of sensitivity of the flow meter, ml/s

\*\*outside the lower limit of the flow meter sensitivity

**Table S4.** Influence of printing parameters on the impermeability and weight of test tubes printed from PA6-CF.

| Extrusion multiplier (k-value) | Extrusion width (w) | Impermeability | Sample weight (g) | Flow rate meter readings (mL/sec) |
|--------------------------------|---------------------|----------------|-------------------|-----------------------------------|
| <b>PA6-CF</b>                  |                     |                |                   |                                   |
| 0.85                           | 0.5                 | -              | 4.71              | 46.90*                            |
| 0.85                           | 0.5                 | -              | 4.72              | 46.90                             |
| 0.85                           | 0.5                 | -              | 4.71              | 46.90                             |
| <b>mean value</b>              |                     | -              | <b>4.71</b>       | <b>46.90</b>                      |
| 0.95                           | 0.5                 | -              | 5.24              | 38.90                             |
| 0.95                           | 0.5                 | -              | 5.23              | 40.61                             |
| 0.95                           | 0.5                 | -              | 5.22              | 41.92                             |
| <b>mean value</b>              |                     | -              | <b>5.23</b>       | <b>40.48</b>                      |
| 1.05                           | 0.5                 | -              | 5.64              | 12.42                             |
| 1.05                           | 0.5                 | -              | 5.80              | 8.64                              |
| 1.05                           | 0.5                 | -              | 5.70              | 7.98                              |
| <b>mean value</b>              |                     | -              | <b>5.71</b>       | <b>9.68</b>                       |
| 1.1                            | 0.5                 | -              | 6.03              | 2.77                              |
| 1.1                            | 0.5                 | -              | 6.09              | 1.86                              |
| 1.1                            | 0.5                 | -              | 6.05              | 2.95                              |
| <b>mean value</b>              |                     | -              | <b>6.06</b>       | <b>2.53</b>                       |
| 0.85                           | 0.6                 | -              | 5.54              | 2.47                              |
| 0.85                           | 0.6                 | -              | 5.54              | 4.31                              |
| 0.85                           | 0.6                 | -              | 5.60              | 1.49                              |
| <b>mean value</b>              |                     | -              | <b>5.66</b>       | <b>5.56</b>                       |
| 0.95                           | 0.6                 | -              | 6.31              | 0.00                              |
| 0.95                           | 0.6                 | -              | 6.27              | 0.00                              |
| 0.95                           | 0.6                 | -              | 6.18              | 0.00                              |
| <b>mean value</b>              |                     | -              | <b>6.32</b>       | <b>&gt; 0.00</b>                  |
| 1.05                           | 0.6                 | +              | 7.00              | 0.00                              |
| 1.05                           | 0.6                 | +              | 6.99              | 0.00                              |
| 1.05                           | 0.6                 | +              | 6.87              | 0.00                              |
| <b>mean value</b>              |                     | <b>+</b>       | <b>6.98</b>       | <b>0.00</b>                       |
| 1.1                            | 0.6                 | +              | 7.23              | 0.00                              |
| 1.1                            | 0.6                 | +              | 7.21              | 0.00                              |
| 1.1                            | 0.6                 | +              | 7.19              | 0.00                              |
| <b>mean value</b>              |                     | <b>+</b>       | <b>7.30</b>       | <b>0.00</b>                       |
| 0.85                           | 0.7                 | -              | 5.61              | 0.08                              |
| 0.85                           | 0.7                 | -              | 5.59              | 0.00                              |
| 0.85                           | 0.7                 | -              | 5.55              | 0.00                              |
| <b>mean value</b>              |                     | -              | <b>5.58</b>       | <b>0.03</b>                       |
| 0.95                           | 0.7                 | +              | 6.24              | 0.00                              |

|            |     |   |             |             |
|------------|-----|---|-------------|-------------|
| 0.95       | 0.7 | + | 6.27        | 0.00        |
| 0.95       | 0.7 | + | 6.26        | 0.00        |
| mean value |     | + | <b>6.26</b> | <b>0.00</b> |
| 1.05       | 0.7 | + | 6.87        | 0.00        |
| 1.05       | 0.7 | + | 6.91        | 0.00        |
| 1.05       | 0.7 | + | 6.88        | 0.00        |
| mean value |     | + | <b>6.89</b> | <b>0.00</b> |
| 1.1        | 0.7 | + | 7.19        | 0.00        |
| 1.1        | 0.7 | + | 7.19        | 0.00        |
| 1.1        | 0.7 | + | 7.17        | 0.00        |
| mean value |     | + | <b>7.18</b> | <b>0.00</b> |

**Table S5.** Influence of printing parameters on the impermeability and weight of test tubes printed from PA.

| Extrusion multiplier (k-value) | Extrusion width (w) | Impermeability | Sample weight (g) | Flow rate meter readings (mL/sec) |
|--------------------------------|---------------------|----------------|-------------------|-----------------------------------|
| <b>PA</b>                      |                     |                |                   |                                   |
| 0.85                           | 0.6                 | -              | 5.01              | 8.31                              |
| 0.85                           | 0.6                 | -              | 4.96              | 2.74                              |
| 0.85                           | 0.6                 | -              | 5.00              | 3.07                              |
| mean value                     |                     | -              | <b>4.99</b>       | <b>4.71</b>                       |
| 0.95                           | 0.6                 | -              | 5.69              | 0.00                              |
| 0.95                           | 0.6                 | -              | 5.66              | 0.00                              |
| 0.95                           | 0.6                 | -              | 5.67              | 0.00                              |
| mean value                     |                     | -              | <b>5.67</b>       | <b>&gt; 0.00*</b>                 |
| 1.05                           | 0.6                 | +              | 6.14              | 0.00                              |
| 1.05                           | 0.6                 | +              | 6.11              | 0.00                              |
| 1.05                           | 0.6                 | +              | 6.10              | 0.00                              |
| mean value                     |                     | +              | <b>6.12</b>       | <b>0.00</b>                       |
| 1.1                            | 0.6                 | +              | 6.52              | 0.00                              |
| 1.1                            | 0.6                 | +              | 6.52              | 0.00                              |
| 1.1                            | 0.6                 | +              | 6.52              | 0.00                              |
| mean value                     |                     | +              | <b>6.52</b>       | <b>0.00</b>                       |

\*outside the lower limit of the flow meter sensitivity

**Table S6.** Influence of printing parameters on the impermeability and weight of test tubes printed from PP-GF.

| Extrusion multiplier (k-value) | Extrusion width (w) | Impermeability | Sample weight (g) | Flow rate meter readings (mL/sec) |
|--------------------------------|---------------------|----------------|-------------------|-----------------------------------|
| <b>PP-GF</b>                   |                     |                |                   |                                   |
| 0.85                           | 0.6                 | -              | 5.22              | 2.96                              |
| 0.85                           | 0.6                 | -              | 5.20              | 7.31                              |
| 0.85                           | 0.6                 | -              | 5.21              | 3.39                              |
| <b>mean value</b>              |                     | -              | <b>5.21</b>       | <b>4.55</b>                       |
| 0.95                           | 0.6                 | -              | 5.86              | 1.43                              |
| 0.95                           | 0.6                 | -              | 5.85              | 0.00                              |
| 0.95                           | 0.6                 | -              | 5.84              | 0.09                              |
| <b>mean value</b>              |                     | -              | <b>5.85</b>       | <b>0.51</b>                       |
| 1.05                           | 0.6                 | +              | 6.36              | 0.00                              |
| 1.05                           | 0.6                 | -              | 6.34              | 0.00                              |
| 1.05                           | 0.6                 | +              | 6.33              | 0.00                              |
| <b>mean value</b>              |                     | -              | <b>6.34</b>       | <b>&gt; 0.00*</b>                 |
| 1.1                            | 0.6                 | +              | 6.69              | 0.00                              |
| 1.1                            | 0.6                 | +              | 6.67              | 0.00                              |
| 1.1                            | 0.6                 | +              | 6.69              | 0.00                              |
| <b>mean value</b>              |                     | <b>+</b>       | <b>6.68</b>       | <b>0.00</b>                       |

\*outside the lower limit of the flow meter sensitivity

**Table S7.** Influence of printing parameters on the impermeability and weight of test tubes printed from PP.

| Extrusion multiplier (k-value) | Extrusion width (w) | Impermeability | Sample weight (g) | Flow rate meter readings (mL/sec) |
|--------------------------------|---------------------|----------------|-------------------|-----------------------------------|
| <b>PP</b>                      |                     |                |                   |                                   |
| 0.85                           | 0.6                 | +              | 4.02              | 0.00                              |
| 0.85                           | 0.6                 | +              | 3.97              | 0.00                              |
| 0.85                           | 0.6                 | +              | 4.04              | 0.00                              |
| <b>mean value</b>              |                     | <b>+</b>       | <b>4.01</b>       | <b>0.00</b>                       |
| 0.95                           | 0.6                 | +              | 4.49              | 0.00                              |
| 0.95                           | 0.6                 | +              | 4.41              | 0.00                              |
| 0.95                           | 0.6                 | +              | 4.42              | 0.00                              |
| <b>mean value</b>              |                     | <b>+</b>       | <b>4.44</b>       | <b>0.00</b>                       |
| 1.05                           | 0.6                 | +              | 4.87              | 0.00                              |
| 1.05                           | 0.6                 | +              | 4.85              | 0.00                              |
| 1.05                           | 0.6                 | +              | 4.96              | 0.00                              |
| <b>mean value</b>              |                     | <b>+</b>       | <b>4.89</b>       | <b>0.00</b>                       |

**Table S8.** Influence of printing parameters on the impermeability and weight of test tubes printed from TPU.

| Extrusion multiplier (k-value) | Extrusion width (w) | Impermeability | Sample weight (g) | Flow rate meter readings (mL/sec) |
|--------------------------------|---------------------|----------------|-------------------|-----------------------------------|
| <b>TPU</b>                     |                     |                |                   |                                   |
| 0.85                           | 0.6                 | -              | 5.24              | 0.13                              |
| 0.85                           | 0.6                 | -              | 5.24              | 0.41                              |
| 0.85                           | 0.6                 | -              | 5.24              | 46.90                             |
| <b>mean value</b>              |                     | -              | <b>5.24</b>       | <b>15.81</b>                      |
| 0.95                           | 0.6                 | -              | 5.87              | 15.43                             |
| 0.95                           | 0.6                 | +              | 5.85              | 0.00                              |
| 0.95                           | 0.6                 | +              | 5.88              | 0.00                              |
| <b>mean value</b>              |                     | -              | <b>5.87</b>       | <b>5.14</b>                       |
| 1.05                           | 0.6                 | +              | 6.48              | 0.00                              |
| 1.05                           | 0.6                 | -              | 6.48              | 0.00                              |
| 1.05                           | 0.6                 | +              | 6.47              | 0.00                              |
| <b>mean value</b>              |                     | -              | <b>6.48</b>       | <b>0.00</b>                       |
| 1.1                            | 0.6                 | +              | 6.76              | 0.00                              |
| 1.1                            | 0.6                 | +              | 6.77              | 0.00                              |
| 1.1                            | 0.6                 | +              | 6.77              | 0.00                              |
| <b>mean value</b>              |                     | +              | <b>6.77</b>       | <b>0.00</b>                       |

**Table S9.** Influence of printing parameters on the impermeability and weight of test tubes printed from PC+.

| Extrusion multiplier (k-value) | Extrusion width (w) | Impermeability | Sample weight (g) | Flow rate meter readings (mL/sec) |
|--------------------------------|---------------------|----------------|-------------------|-----------------------------------|
| <b>PC+</b>                     |                     |                |                   |                                   |
| 0.85                           | 0.6                 | -              | 5.71              | 9.12                              |
| 0.85                           | 0.6                 | -              | 5.70              | 10.16                             |
| 0.85                           | 0.6                 | -              | 5.70              | 10.78                             |
| <b>mean value</b>              |                     | -              | <b>5.70</b>       | <b>10.02</b>                      |
| 0.95                           | 0.6                 | -              | 6.32              | 1.53                              |
| 0.95                           | 0.6                 | -              | 6.36              | 1.18                              |
| 0.95                           | 0.6                 | -              | 6.36              | 1.10                              |
| <b>mean value</b>              |                     | -              | <b>6.35</b>       | <b>1.27</b>                       |
| 1.05                           | 0.6                 | -              | 7.04              | 0.72                              |
| 1.05                           | 0.6                 | -              | 7.02              | 1.05                              |
| 1.05                           | 0.6                 | -              | 7.02              | 0.48                              |
| <b>mean value</b>              |                     | -              | <b>7.03</b>       | <b>0.75</b>                       |
| 1.1                            | 0.6                 | -              | 7.38              | 0.57                              |

|            |     |   |             |                   |
|------------|-----|---|-------------|-------------------|
| 1.1        | 0.6 | - | 7.41        | 0.27              |
| 1.1        | 0.6 | - | 7.43        | 0.57              |
| mean value |     | - | <b>7.41</b> | <b>0.47</b>       |
| 0.85       | 0.7 | - | 5.70        | 2.63              |
| 0.85       | 0.7 | - | 5.70        | 2.38              |
| 0.85       | 0.7 | - | 5.72        | 3.19              |
| mean value |     | - | <b>5.71</b> | <b>2.73</b>       |
| 1.2        | 0.6 | - | 7.79        | 0.00              |
| 1.2        | 0.6 | - | 7.78        | 0.00              |
| 1.2        | 0.6 | - | 7.79        | 0.00              |
| mean value |     | - | <b>7.79</b> | <b>&gt; 0.00*</b> |
| 1.3        | 0.6 | + | 8.42        | 0.00              |
| 1.3        | 0.6 | + | 8.35        | 0.00              |
| 1.3        | 0.6 | + | 8.42        | 0.00              |
| mean value |     | + | <b>8.40</b> | <b>0.00</b>       |

\*outside the lower limit of the flow meter sensitivity

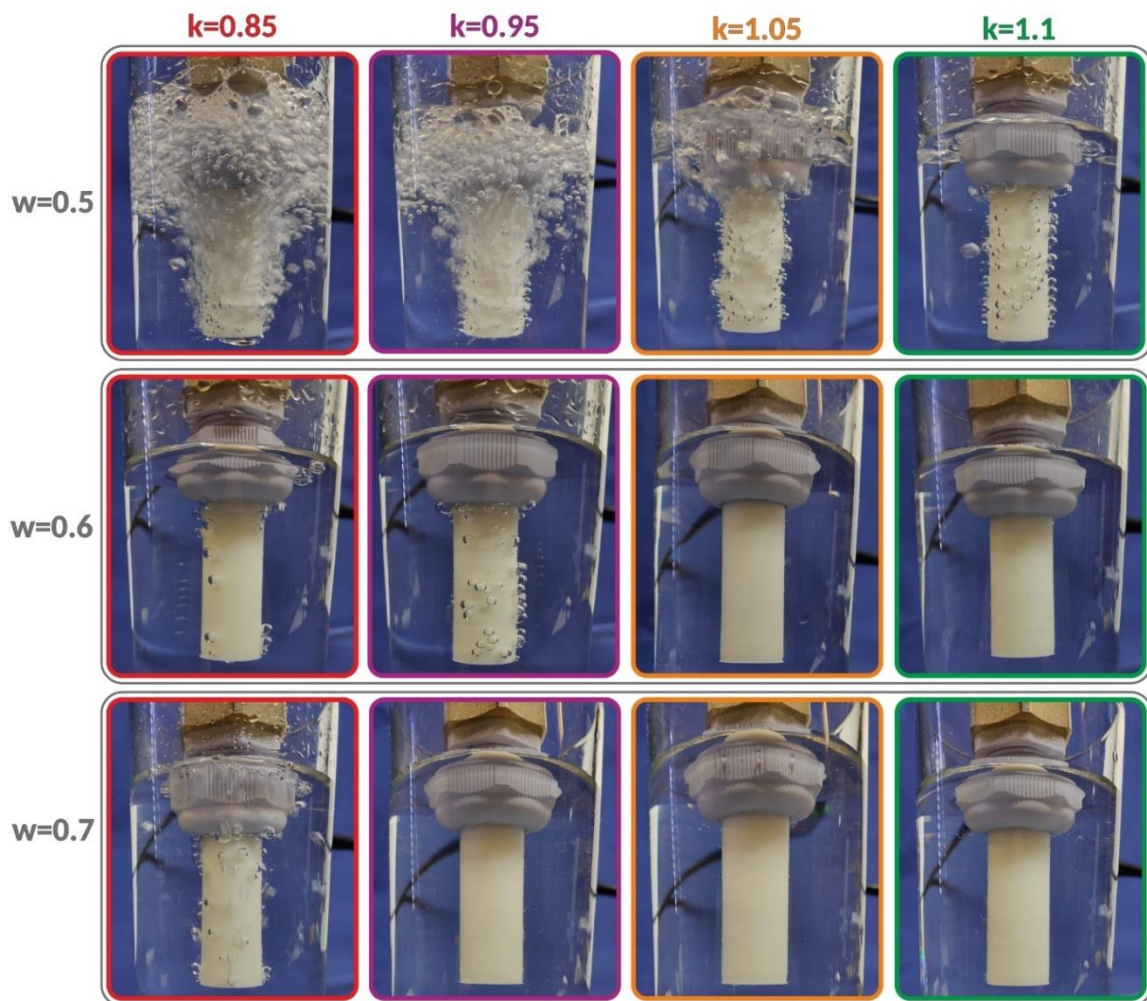

**Figure S48.** The study of microporosity for PLA+ test tubes.

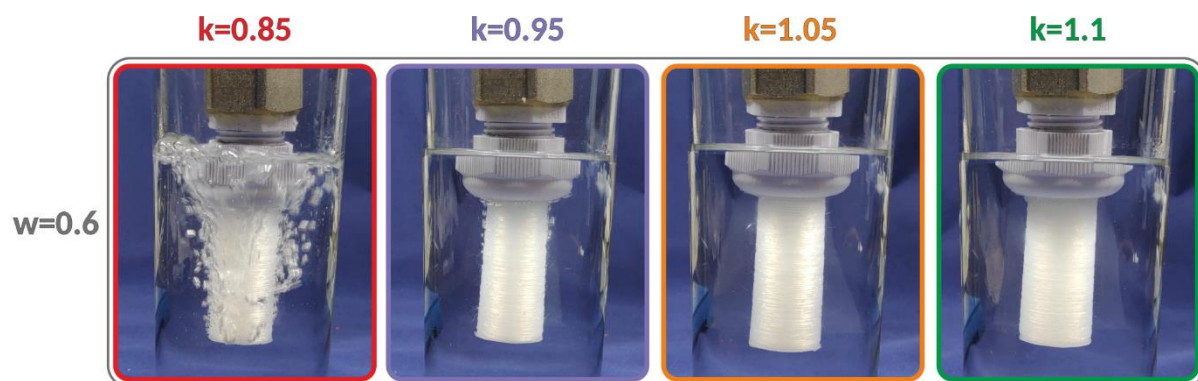

**Figure S49.** The study of microporosity for PA test tubes.

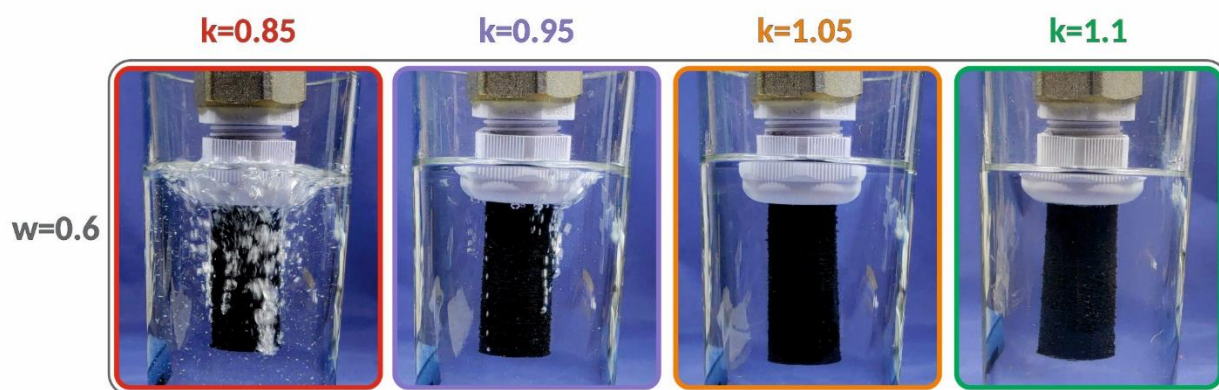

**Figure S50.** The study of microporosity for PP-GF test tubes.

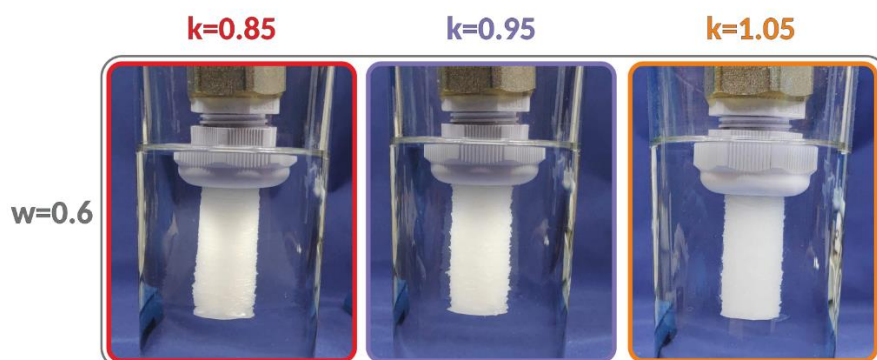

**Figure S51.** The study of microporosity for PP test tubes.

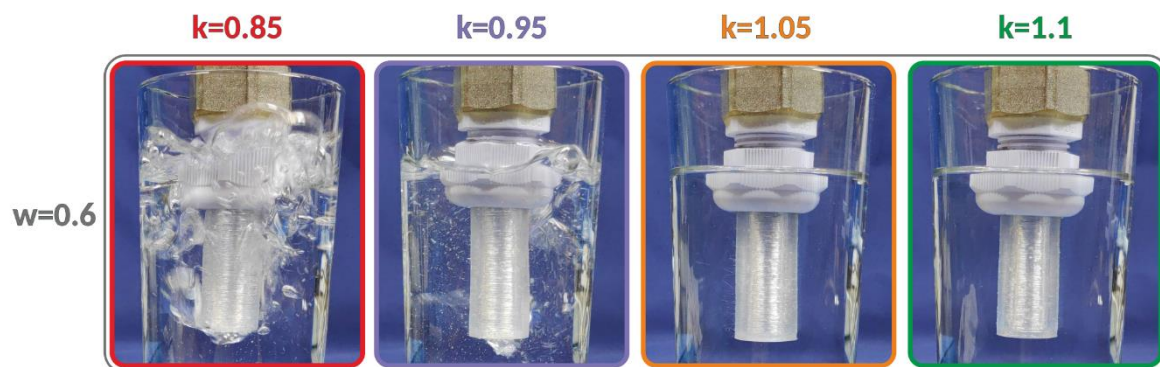

**Figure S52.** The study of microporosity for TPU test tubes.

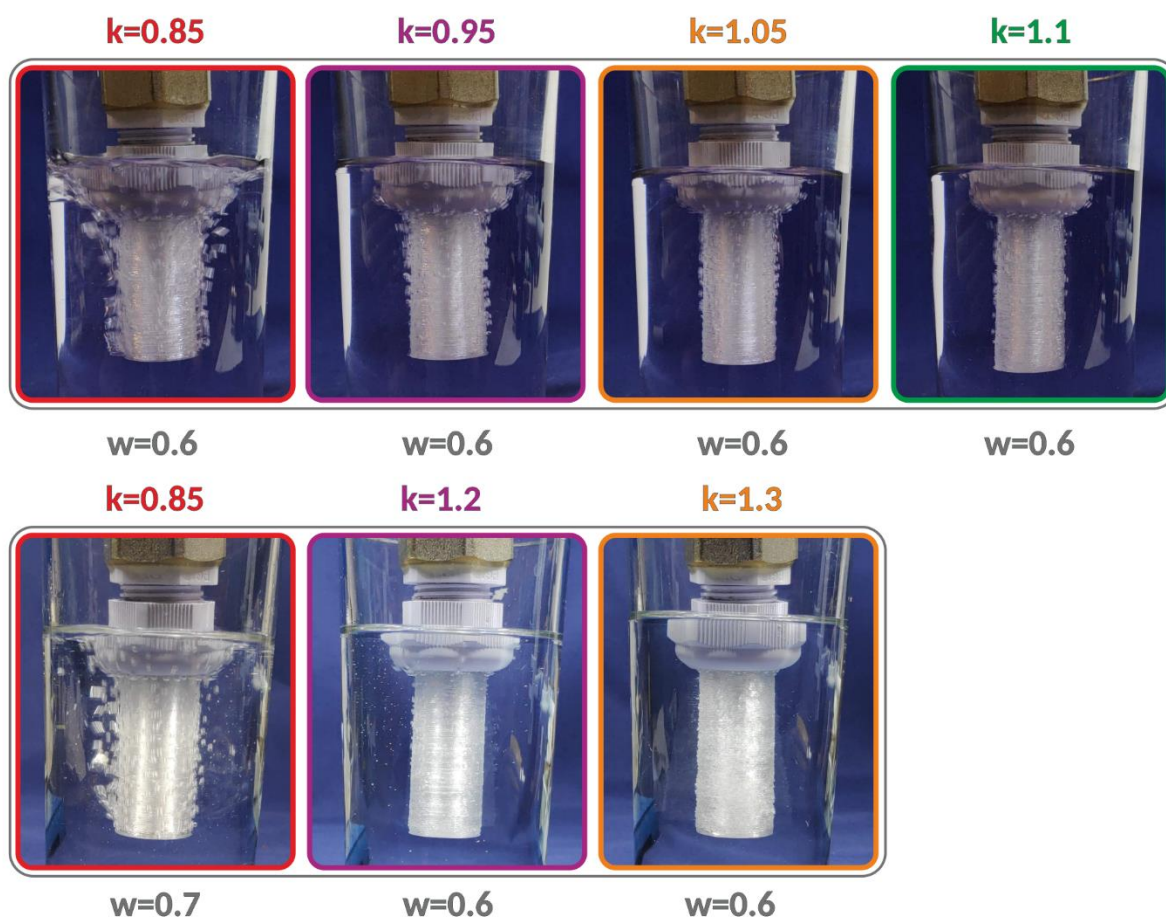

**Figure S53.** The study of microporosity for PC+ test tubes.

## 6. The study of shrinkage drawback

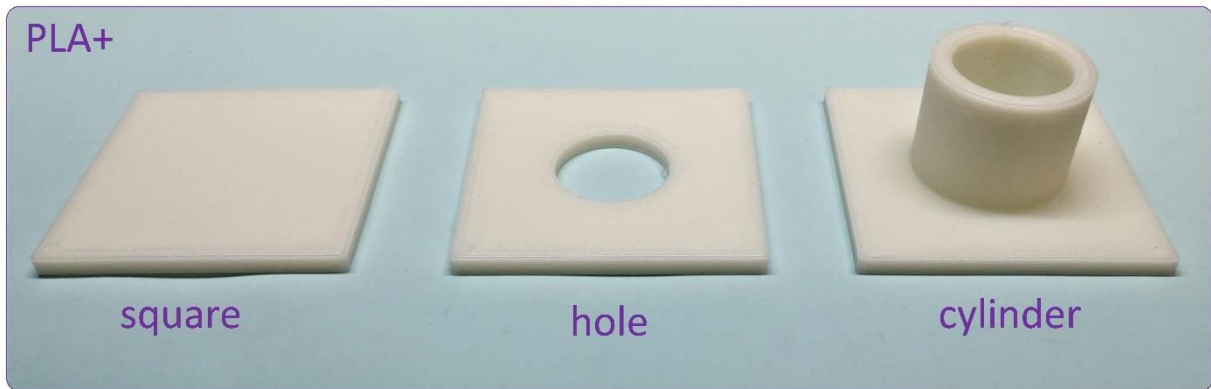

**Figure S54.** PLA+ parts manufactured by FFF for study of the shrinkage.

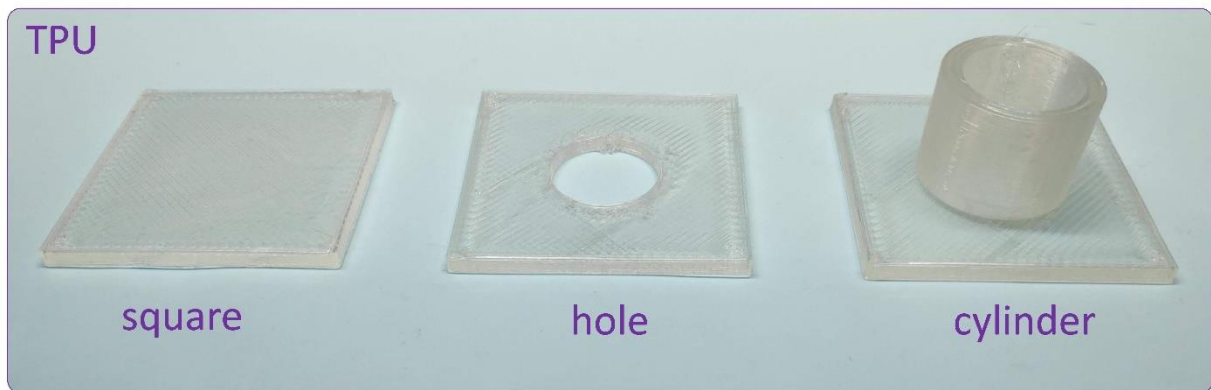

**Figure S55.** TPU parts manufactured by FFF for study of the shrinkage.

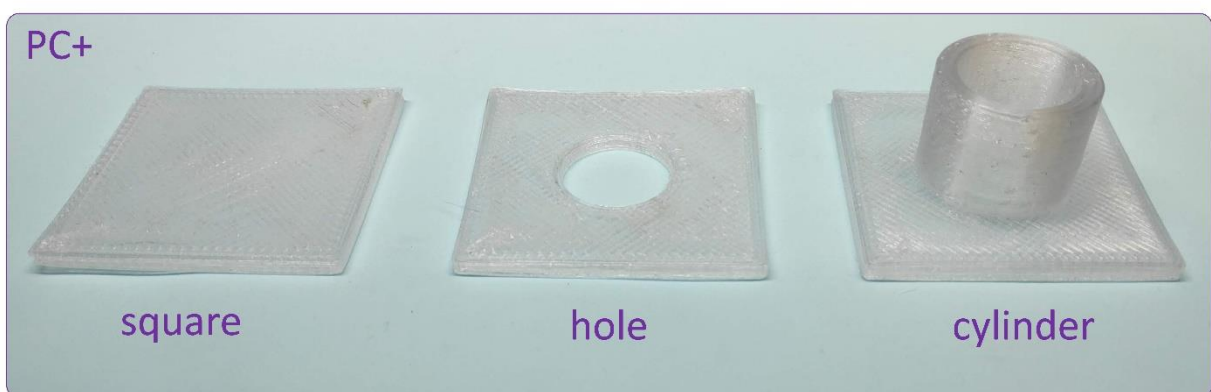

**Figure S56.** PC+ parts manufactured by FFF for study of the shrinkage.

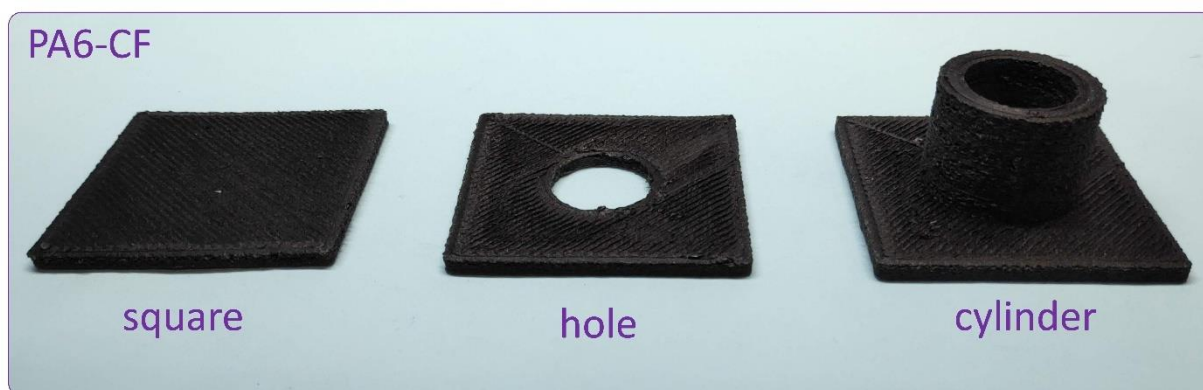

**Figure S57.** PA6-CF parts manufactured by FFF for study of the shrinkage.

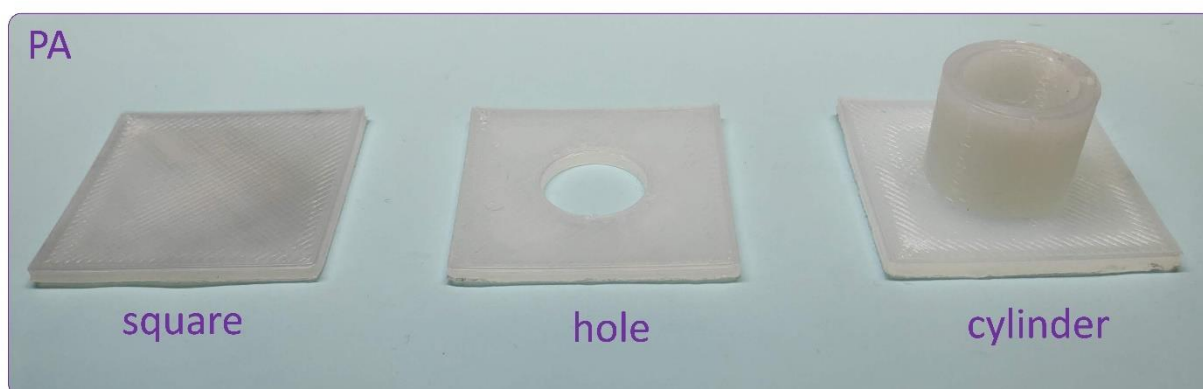

**Figure S58.** PA parts manufactured by FFF for study of the shrinkage.

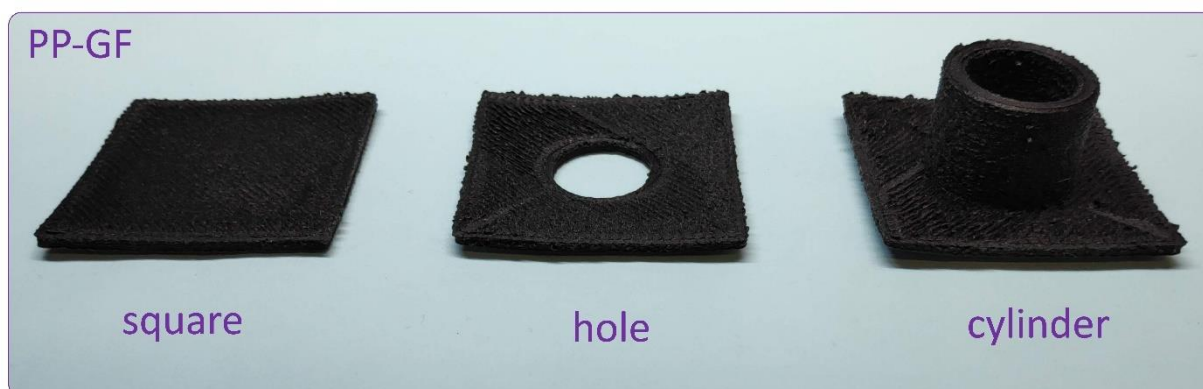

**Figure S59.** PP-GF parts manufactured by FFF for study of the shrinkage.

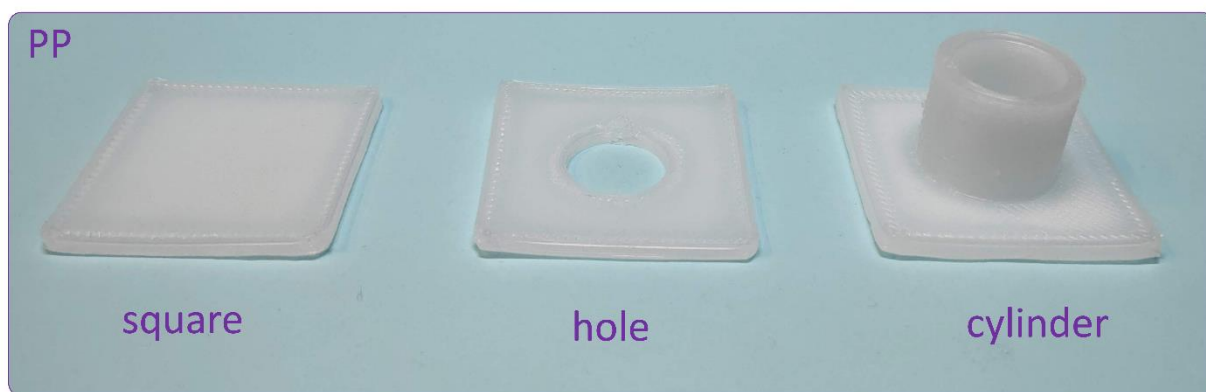

**Figure S60.** PP parts manufactured by FFF for study of the shrinkage.

**Table S10.** Shrinkage of parts manufactured by the FFF method.

| size                        | square | displacement from the specified size (%) | hole  | displacement from the specified size (%) | cylinder | displacement from the specified size (%) | reference parameters |
|-----------------------------|--------|------------------------------------------|-------|------------------------------------------|----------|------------------------------------------|----------------------|
| <b>PLA+</b>                 |        |                                          |       |                                          |          |                                          |                      |
| a <sub>1</sub> <sup>a</sup> | 49.94  | 0.12                                     | 50.06 | 0.12                                     | 50.05    | 0.10                                     | 50.00                |
| a <sub>2</sub> <sup>b</sup> | 49.94  | 0.12                                     | 50.06 | 0.12                                     | 50.05    | 0.10                                     | 50.00                |
| b <sup>c</sup>              | 3.23   | 7.67                                     | 3.19  | 6.33                                     | 3.20     | 6.67                                     | 3.00                 |
| D <sub>1</sub> <sup>d</sup> | –      | –                                        | 19.62 | 1.90                                     | 19.18    | 4.10                                     | 20.00                |
| D <sub>2</sub> <sup>e</sup> | –      | –                                        | –     | –                                        | 26.04    | 0.15                                     | 26.00                |
| h <sup>f</sup>              | –      | –                                        | –     | –                                        | 22.97    | 0.13                                     | 23.00                |
| <b>TPU</b>                  |        |                                          |       |                                          |          |                                          |                      |
| a <sub>1</sub> <sup>a</sup> | 49.64  | 0.72                                     | 49.42 | 1.16                                     | 49.60    | 0.80                                     | 50.00                |
| a <sub>2</sub> <sup>b</sup> | 49.57  | 0.86                                     | 49.42 | 1.16                                     | 49.55    | 0.90                                     | 50.00                |
| b <sup>c</sup>              | 2.80   | 6.67                                     | 2.58  | 14.00                                    | 3.14     | 4.67                                     | 3.00                 |
| D <sub>1</sub> <sup>d</sup> | –      | –                                        | 19.23 | 3.85                                     | 18.86    | 5.70                                     | 20.00                |
| D <sub>2</sub> <sup>e</sup> | –      | –                                        | –     | –                                        | 26.00    | 0.00                                     | 26.00                |
| h <sup>f</sup>              | –      | –                                        | –     | –                                        | 22.66    | 1.48                                     | 23.00                |
| <b>PC+</b>                  |        |                                          |       |                                          |          |                                          |                      |
| a <sub>1</sub> <sup>a</sup> | 50.40  | 0.80                                     | 50.63 | 1.26                                     | 50.47    | 0.94                                     | 50.00                |
| a <sub>2</sub> <sup>b</sup> | 50.61  | 1.22                                     | 50.40 | 0.80                                     | 50.57    | 1.14                                     | 50.00                |
| b <sup>c</sup>              | 3.03   | 1.00                                     | 3.07  | 2.33                                     | 3.27     | 9.00                                     | 3.00                 |
| D <sub>1</sub> <sup>d</sup> | –      | –                                        | 19.17 | 4.15                                     | 19.01    | 4.95                                     | 20.00                |
| D <sub>2</sub> <sup>e</sup> | –      | –                                        | –     | –                                        | 26.41    | 1.58                                     | 26.00                |
| h <sup>f</sup>              | –      | –                                        | –     | –                                        | 22.87    | 0.57                                     | 23.00                |
| <b>PA6-CF</b>               |        |                                          |       |                                          |          |                                          |                      |
| a <sub>1</sub> <sup>a</sup> | 51.39  | 2.78                                     | 51.22 | 2.44                                     | 51.06    | 2.12                                     | 50.00                |
| a <sub>2</sub> <sup>b</sup> | 51.24  | 2.48                                     | 51.22 | 2.44                                     | 51.01    | 2.02                                     | 50.00                |
| b <sup>c</sup>              | 3.14   | 4.67                                     | 3.30  | 10.00                                    | 3.64     | 21.33                                    | 3.00                 |
| D <sub>1</sub> <sup>d</sup> | –      | –                                        | 18.74 | 6.30                                     | 18.48    | 7.60                                     | 20.00                |
| D <sub>2</sub> <sup>e</sup> | –      | –                                        | –     | –                                        | 27.36    | 5.23                                     | 26.00                |
| h <sup>f</sup>              | –      | –                                        | –     | –                                        | 22.87    | 0.57                                     | 23.00                |
| <b>PA</b>                   |        |                                          |       |                                          |          |                                          |                      |
| a <sub>1</sub> <sup>a</sup> | 49.82  | 0.36                                     | 49.75 | 0.50                                     | 49.84    | 0.32                                     | 50.00                |
| a <sub>2</sub> <sup>b</sup> | 49.65  | 0.70                                     | 49.62 | 0.76                                     | 49.83    | 0.34                                     | 50.00                |
| b <sup>c</sup>              | 2.94   | 2.00                                     | 2.92  | 2.67                                     | 3.23     | 7.67                                     | 3.00                 |
| D <sub>1</sub> <sup>d</sup> | –      | –                                        | 19.05 | 4.75                                     | 18.74    | 6.30                                     | 20.00                |
| D <sub>2</sub> <sup>e</sup> | –      | –                                        | –     | –                                        | 26.14    | 0.54                                     | 26.00                |
| h <sup>f</sup>              | –      | –                                        | –     | –                                        | 22.71    | 1.26                                     | 23.00                |
| <b>PP-GF</b>                |        |                                          |       |                                          |          |                                          |                      |
| a <sub>1</sub> <sup>a</sup> | 51.00  | 2.00                                     | 51.17 | 2.34                                     | 51.23    | 2.46                                     | 50.00                |
| a <sub>2</sub> <sup>b</sup> | 50.70  | 1.40                                     | 51.19 | 2.38                                     | 51.03    | 2.06                                     | 50.00                |
| b <sup>c</sup>              | 3.10   | 3.33                                     | 3.10  | 3.33                                     | 3.39     | 13.00                                    | 3.00                 |
| D <sub>1</sub> <sup>d</sup> | –      | –                                        | 19.04 | 4.80                                     | 18.60    | 7.00                                     | 20.00                |
| D <sub>2</sub> <sup>e</sup> | –      | –                                        | –     | –                                        | 26.93    | 3.58                                     | 26.00                |
| h <sup>f</sup>              | –      | –                                        | –     | –                                        | 22.83    | 0.74                                     | 23.00                |
| <b>PP</b>                   |        |                                          |       |                                          |          |                                          |                      |
| a <sub>1</sub> <sup>a</sup> | 48.25  | 3.50                                     | 48.22 | 3.56                                     | 48.00    | 4.00                                     | 50.00                |
| a <sub>2</sub> <sup>b</sup> | 48.29  | 3.42                                     | 48.40 | 3.20                                     | 48.64    | 2.72                                     | 50.00                |
| b <sup>c</sup>              | 2.83   | 5.67                                     | 2.79  | 7.00                                     | 3.09     | 3.00                                     | 3.00                 |
| D <sub>1</sub> <sup>d</sup> | –      | –                                        | 18.97 | 5.15                                     | 18.74    | 6.30                                     | 20.00                |
| D <sub>2</sub> <sup>e</sup> | –      | –                                        | –     | –                                        | 24.95    | 4.04                                     | 26.00                |
| h <sup>f</sup>              | –      | –                                        | –     | –                                        | 23.10    | 0.43                                     | 23.00                |

<sup>a</sup> width (mm); <sup>b</sup> width (mm); <sup>c</sup> depth (mm); <sup>d</sup> inside diameter (mm); <sup>i</sup> external diameter (mm); <sup>f</sup> cylinder height + b (mm).

## 7. Transfer hydrogenation in FFF batch reactor

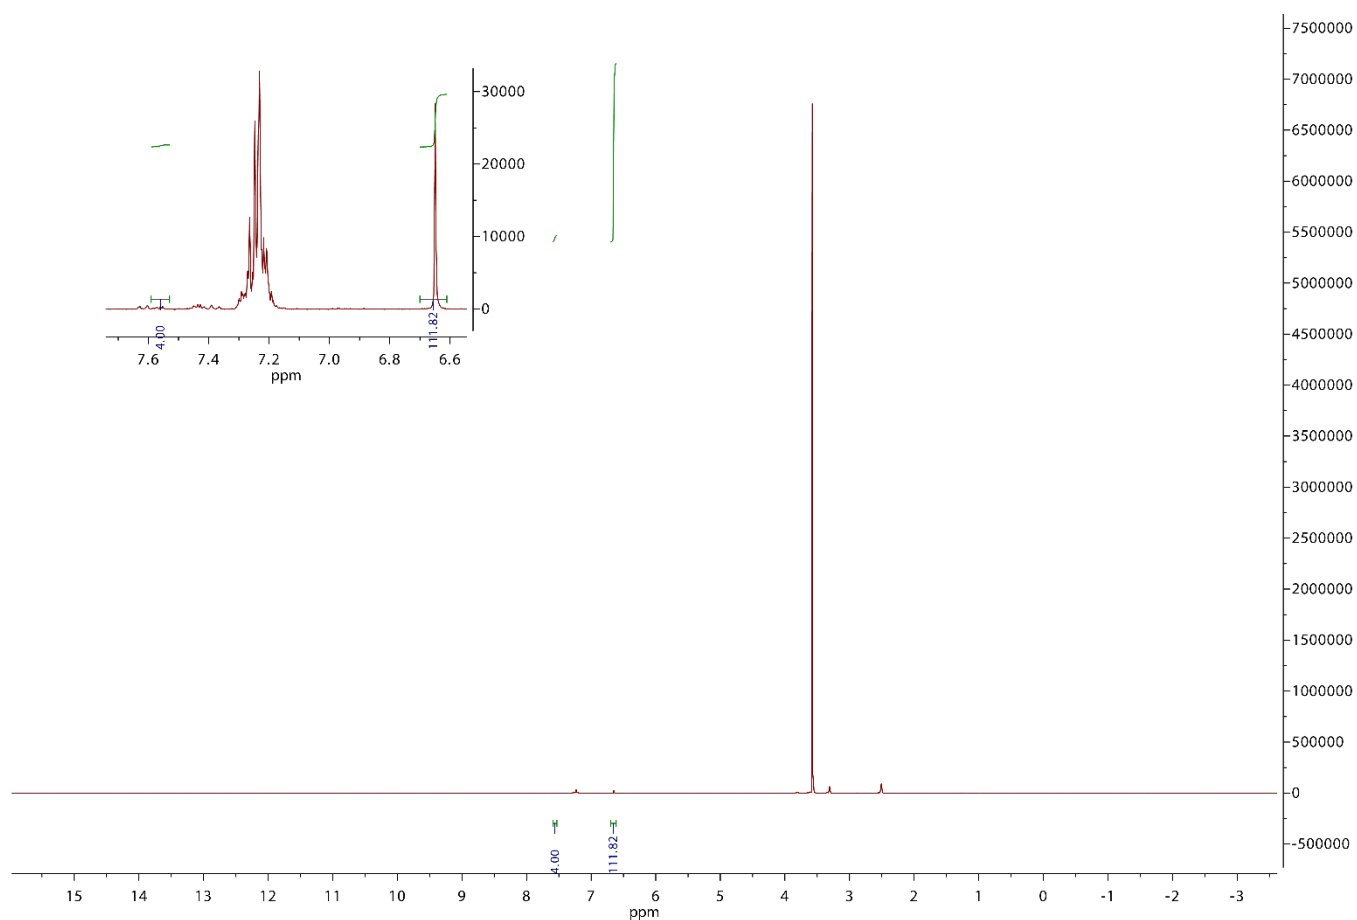

**Figure S61.**  $^1\text{H}$  NMR spectrum of the reaction mixture after hydrogenation in FFF batch PA reactor. The first experimental point for averaging the value of the conversion of diphenylacetylene.

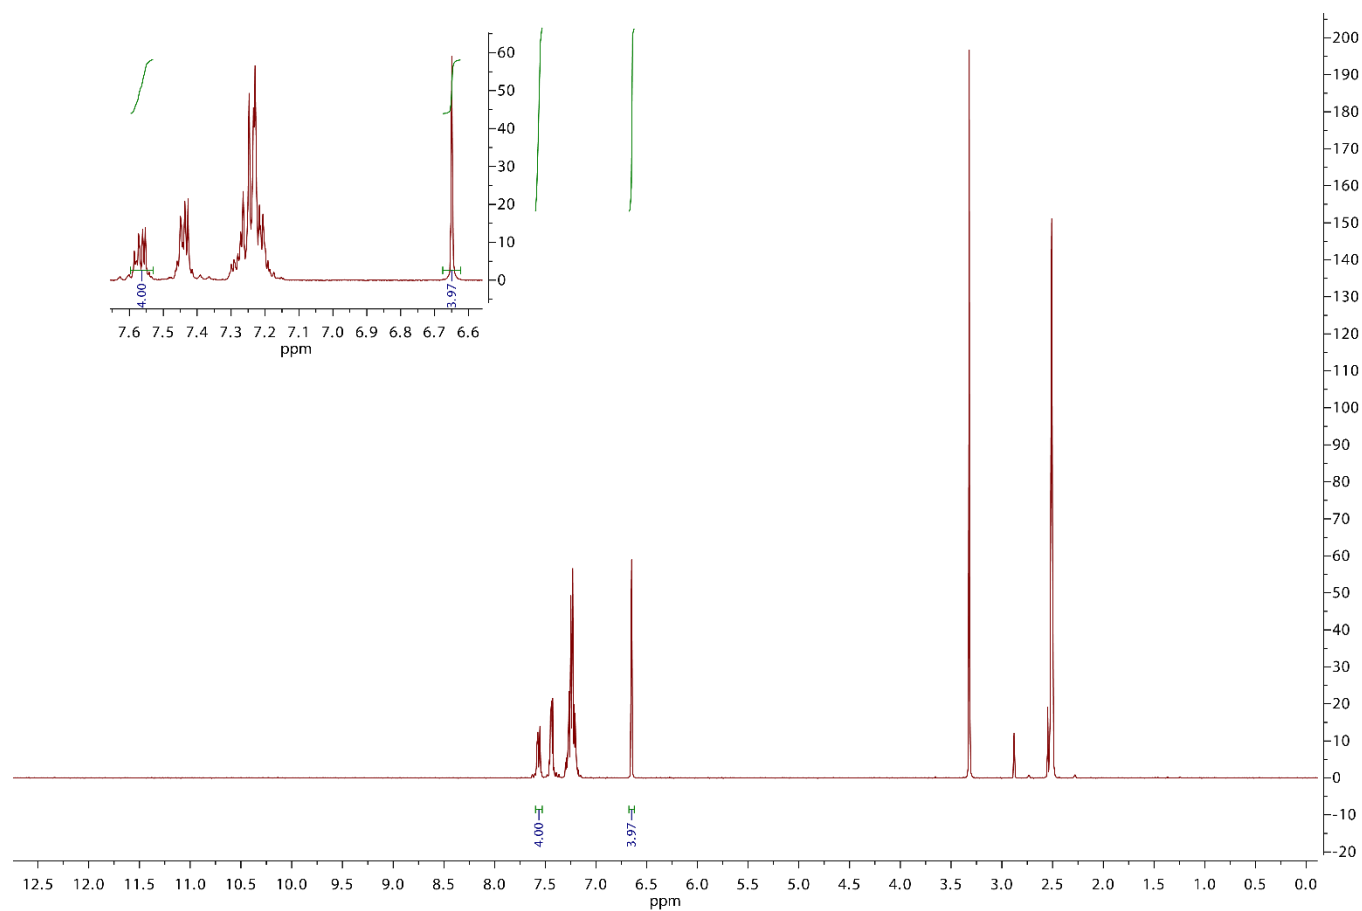

**Figure S62.**  $^1\text{H}$  NMR spectrum of the reaction mixture after hydrogenation in FFF batch PA reactor. The second experimental point for averaging the value of the conversion of diphenylacetylene.

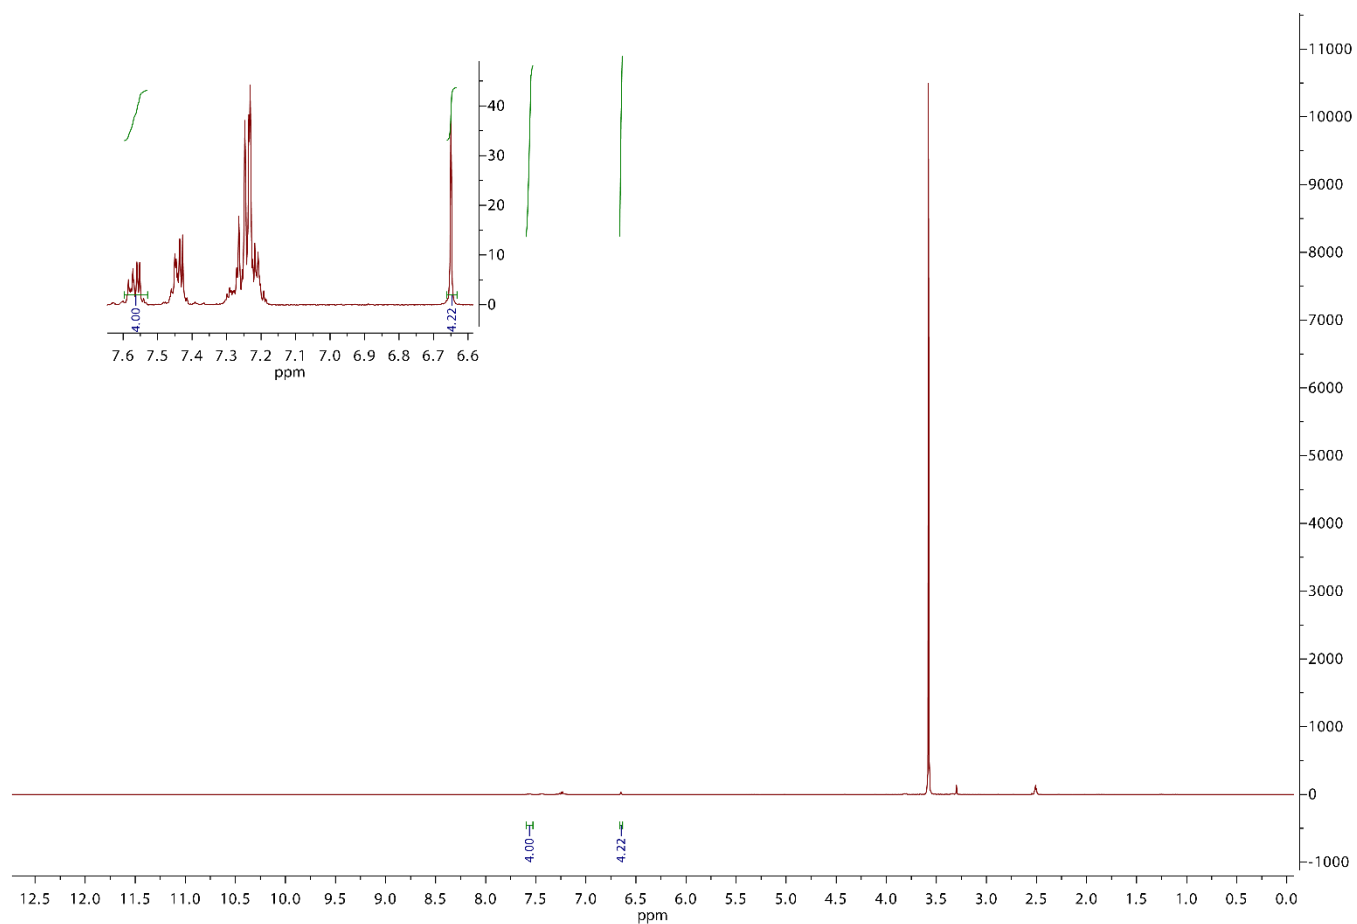

**Figure S63.**  $^1\text{H}$  NMR spectrum of the reaction mixture after hydrogenation in FFF batch PA reactor. The third experimental point for averaging the value of the conversion of diphenylacetylene.

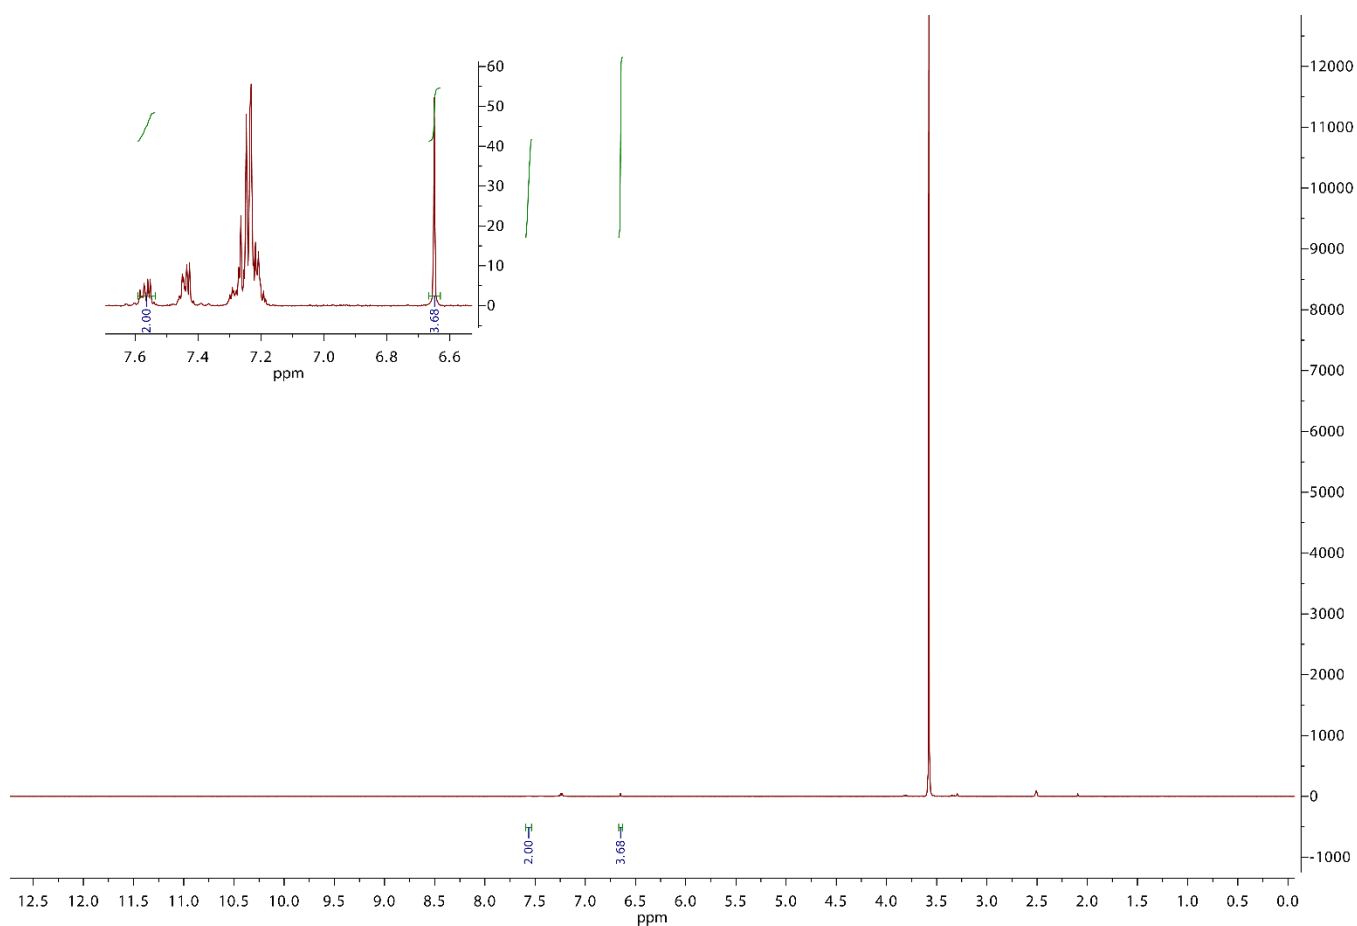

**Figure S64.**  $^1\text{H}$  NMR spectrum of the reaction mixture after hydrogenation in FFF batch PA reactor. The fourth experimental point for averaging the value of the conversion of diphenylacetylene.

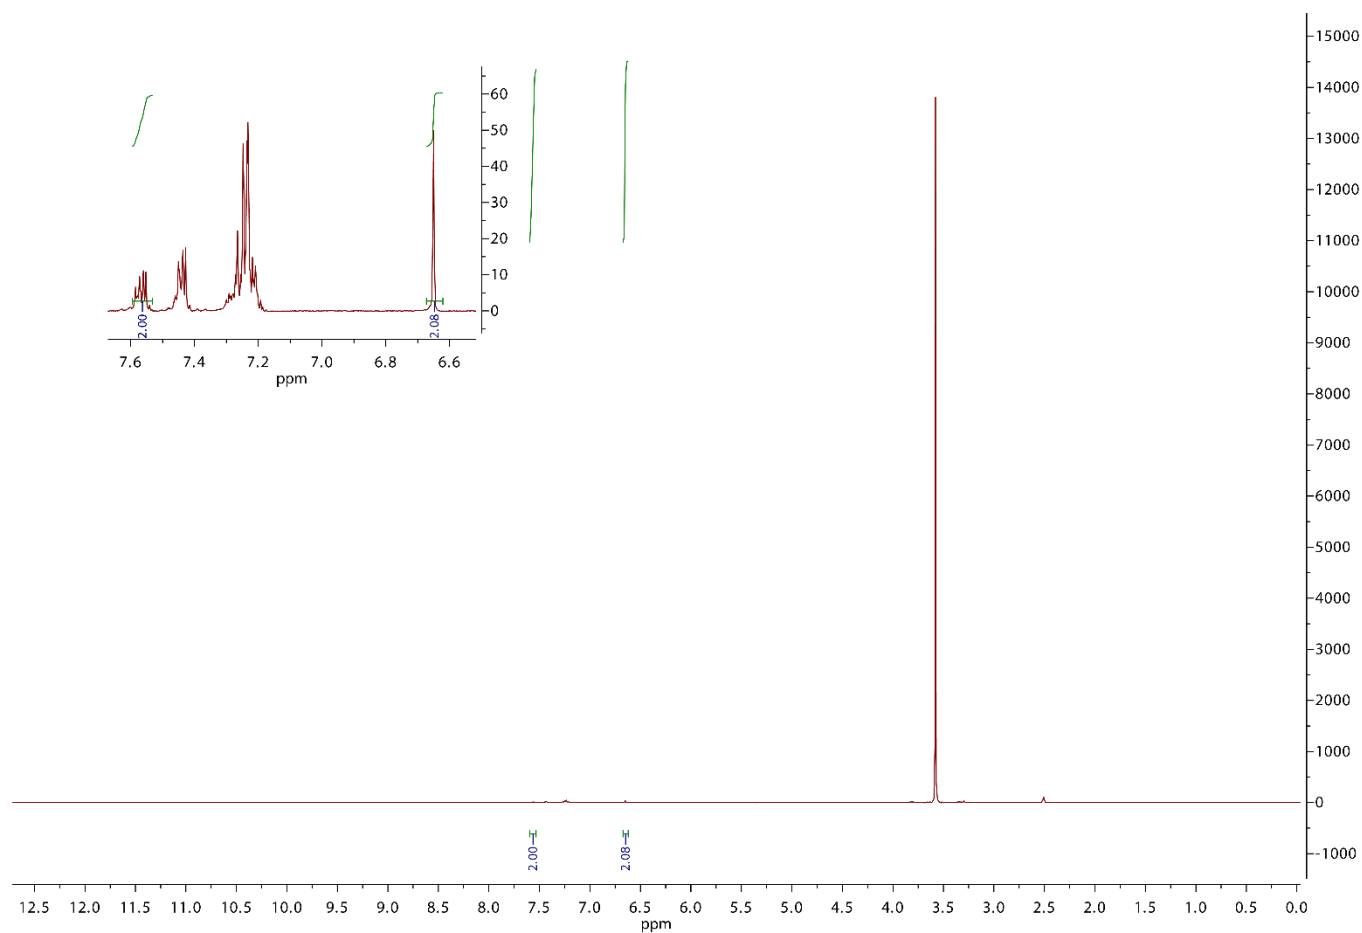

**Figure S65.**  $^1\text{H}$  NMR spectrum of the reaction mixture after hydrogenation in FFF batch PA reactor. The fifth experimental point for averaging the value of the conversion of diphenylacetylene.

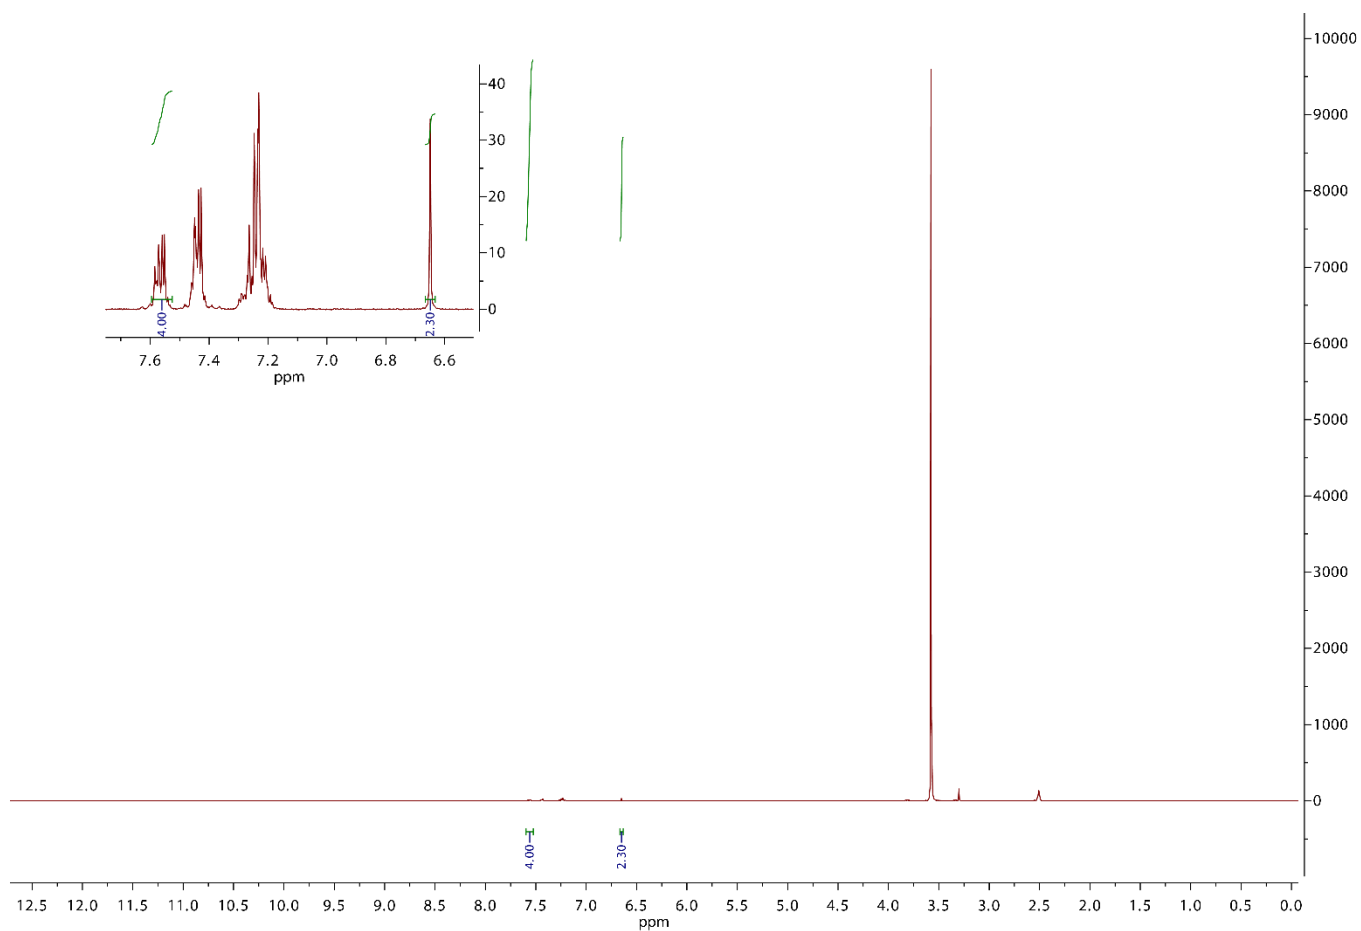

**Figure S66.**  $^1\text{H}$  NMR spectrum of the reaction mixture after hydrogenation in FFF batch PA6-CF reactor. The first experimental point for averaging the value of the conversion of diphenylacetylene.

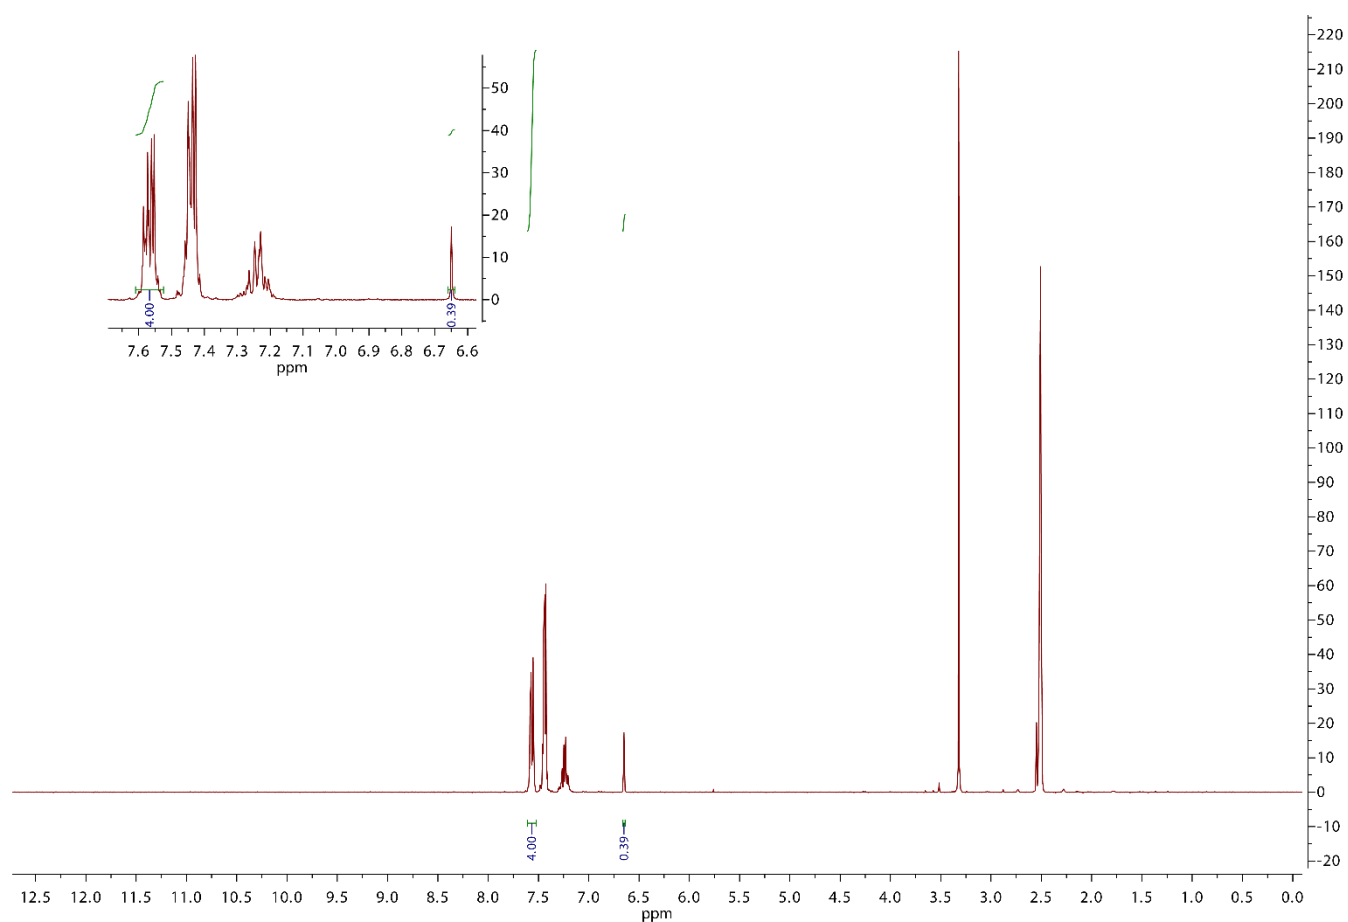

**Figure S67.**  $^1\text{H}$  NMR spectrum of the reaction mixture after hydrogenation in FFF batch PA6-CF reactor. The second experimental point for averaging the value of the conversion of diphenylacetylene.

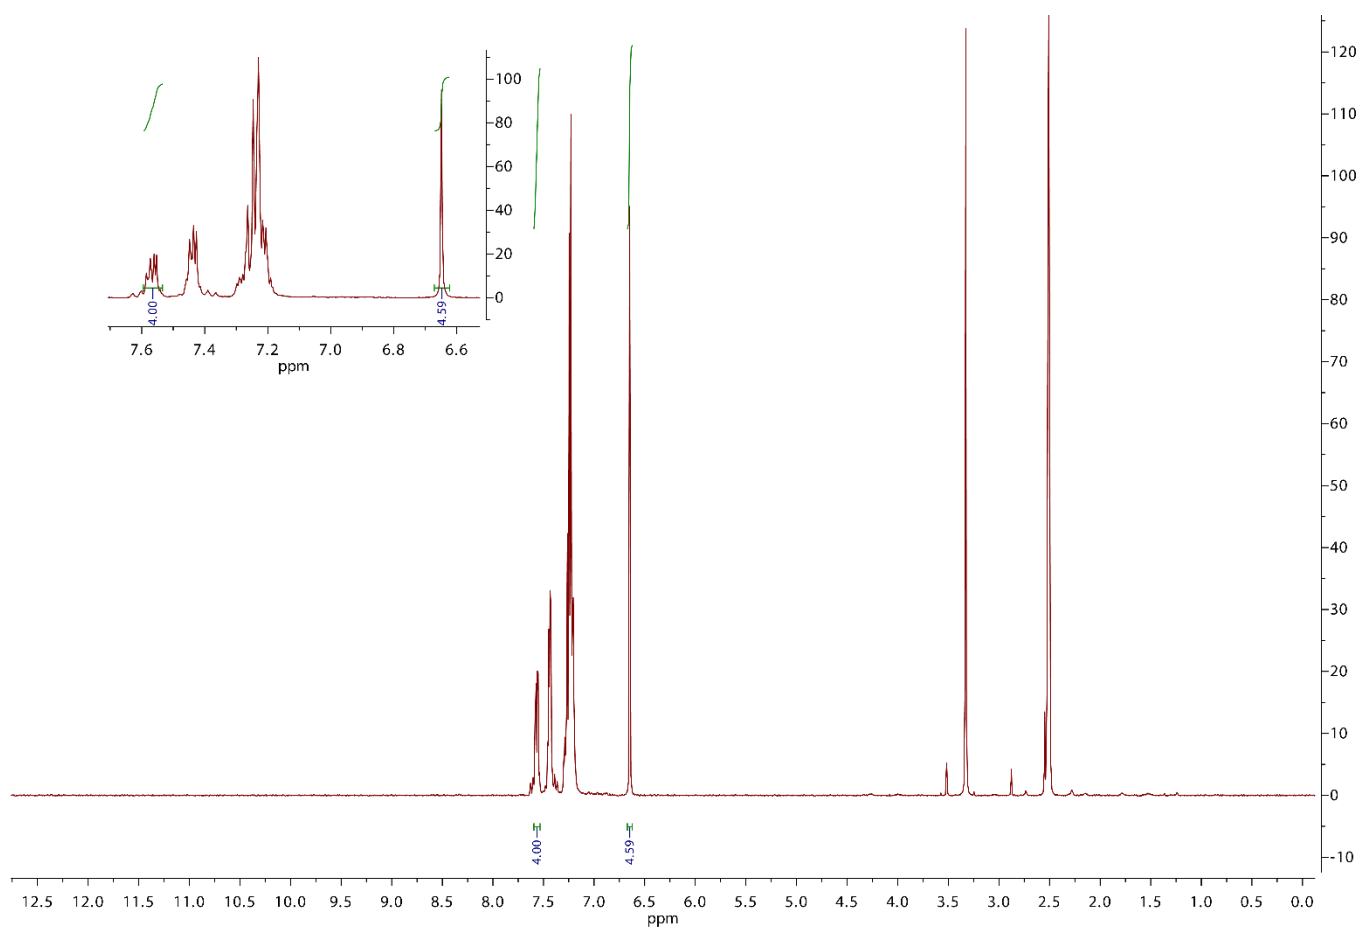

**Figure S68.**  $^1\text{H}$  NMR spectrum of the reaction mixture after hydrogenation in FFF batch PA6-CF reactor. The third experimental point for averaging the value of the conversion of diphenylacetylene.

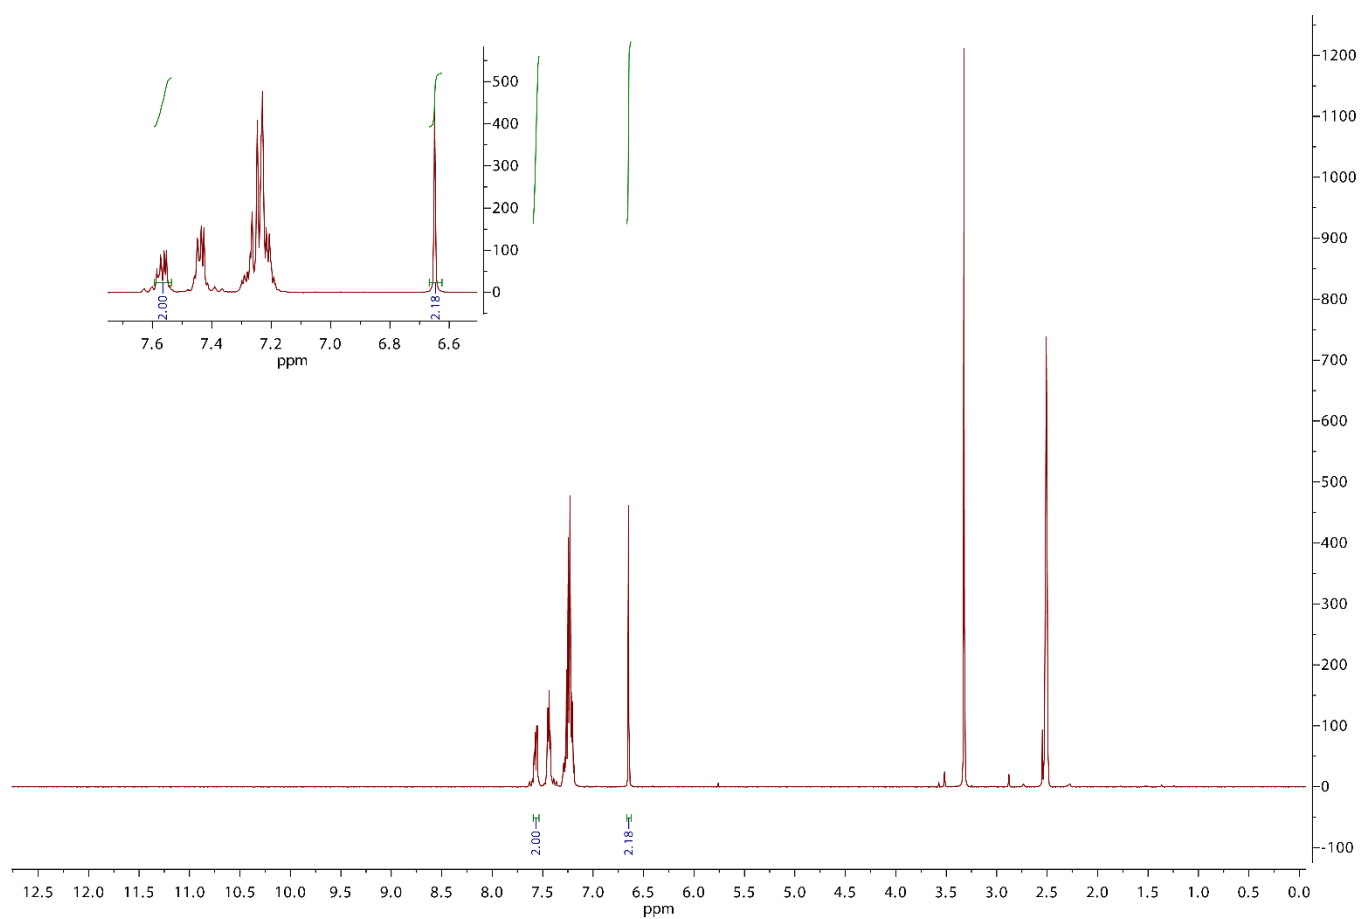

**Figure S69.**  $^1\text{H}$  NMR spectrum of the reaction mixture after hydrogenation in FFF batch PA6-CF reactor. The fourth experimental point for averaging the value of the conversion of diphenylacetylene.

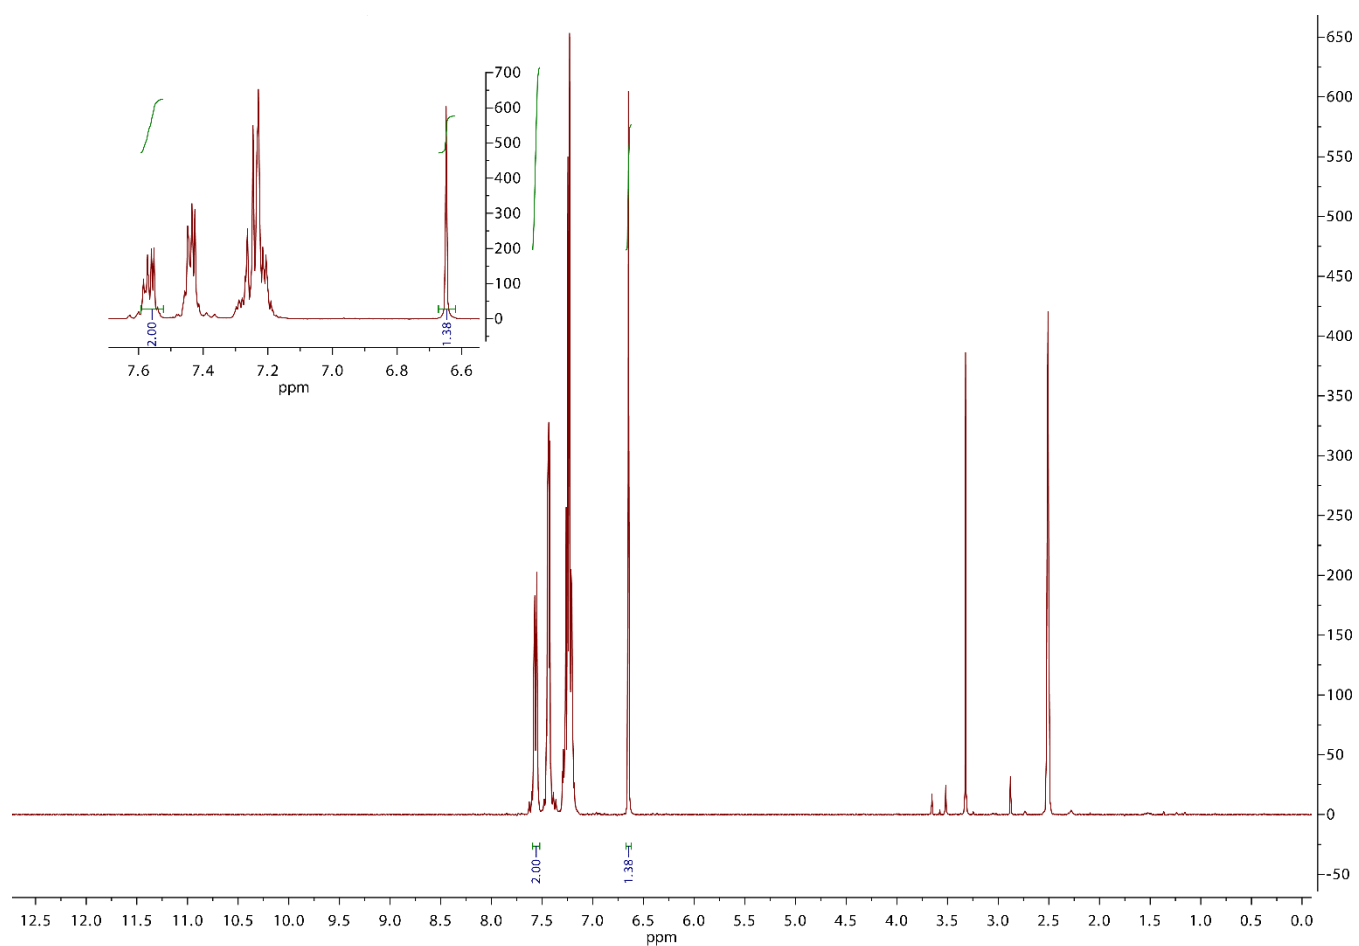

**Figure S70.**  $^1\text{H}$  NMR spectrum of the reaction mixture after hydrogenation in FFF batch PA6-CF reactor. The fifth experimental point for averaging the value of the conversion of diphenylacetylene.

## 8. Transfer hydrogenation in FFF flow reactor

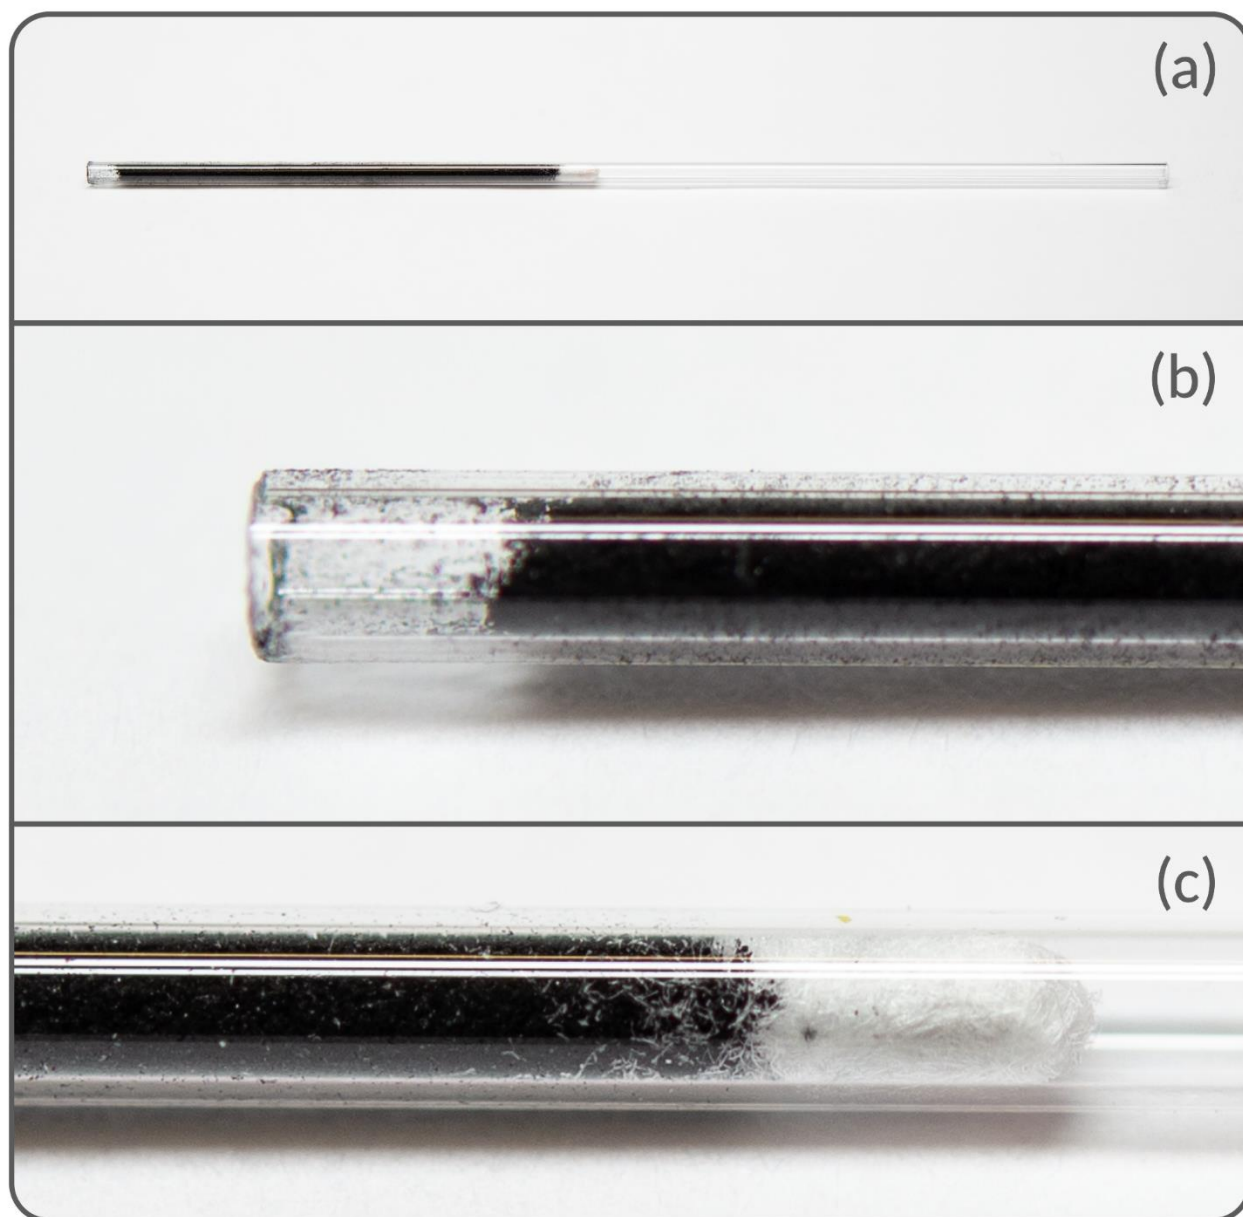

**Figure S71.** Catalytic tube with filter, filled Pd/C (10%) and  $K_2CO_3$ .

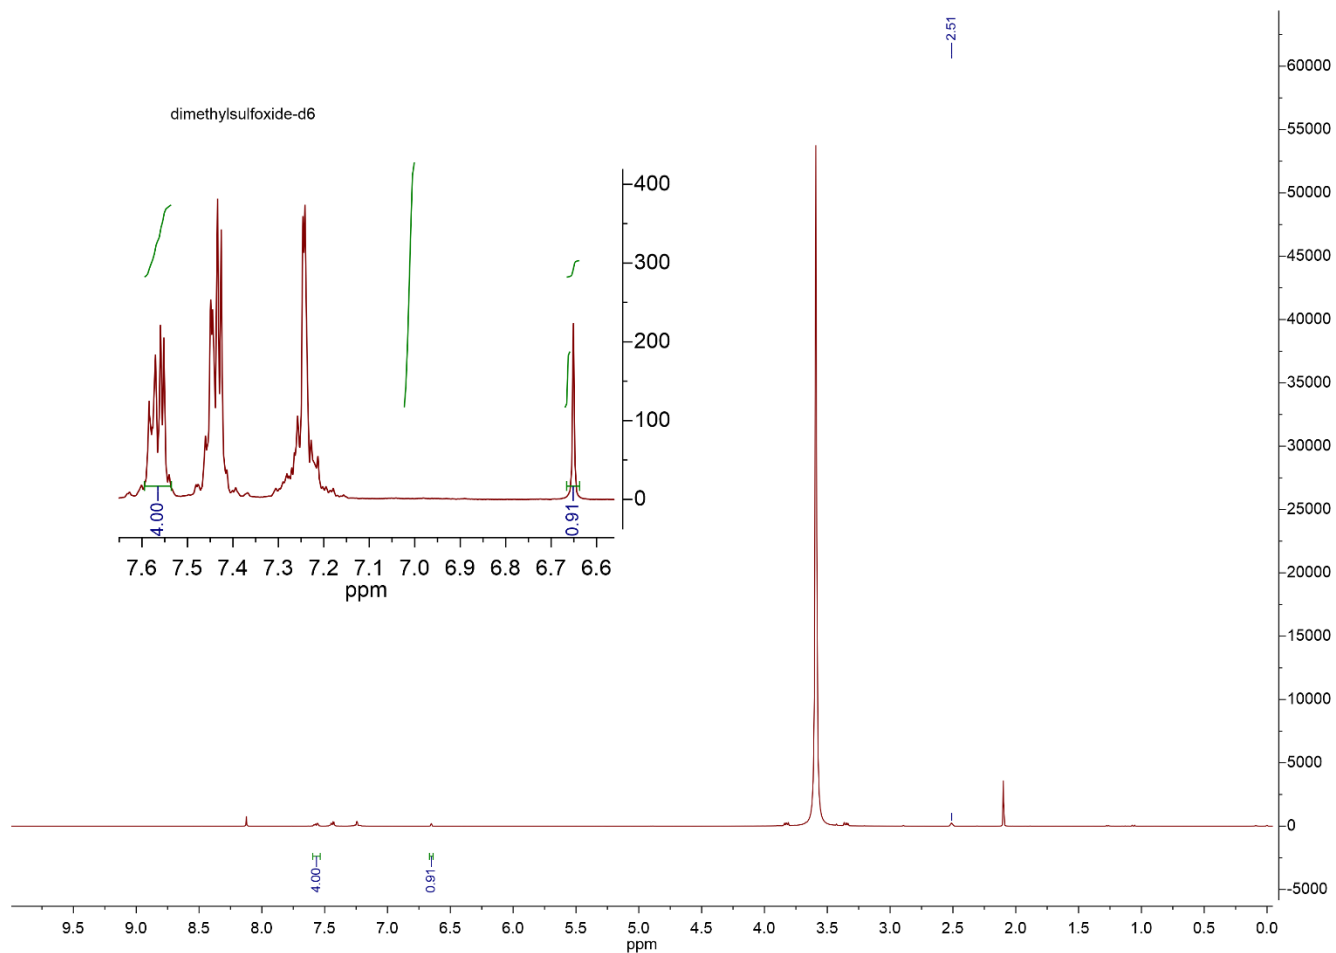

**Figure S72.**  $^1\text{H}$  NMR spectrum of the reaction mixture after hydrogenation in the first FFF module of the PA6-CF flow reactor system.

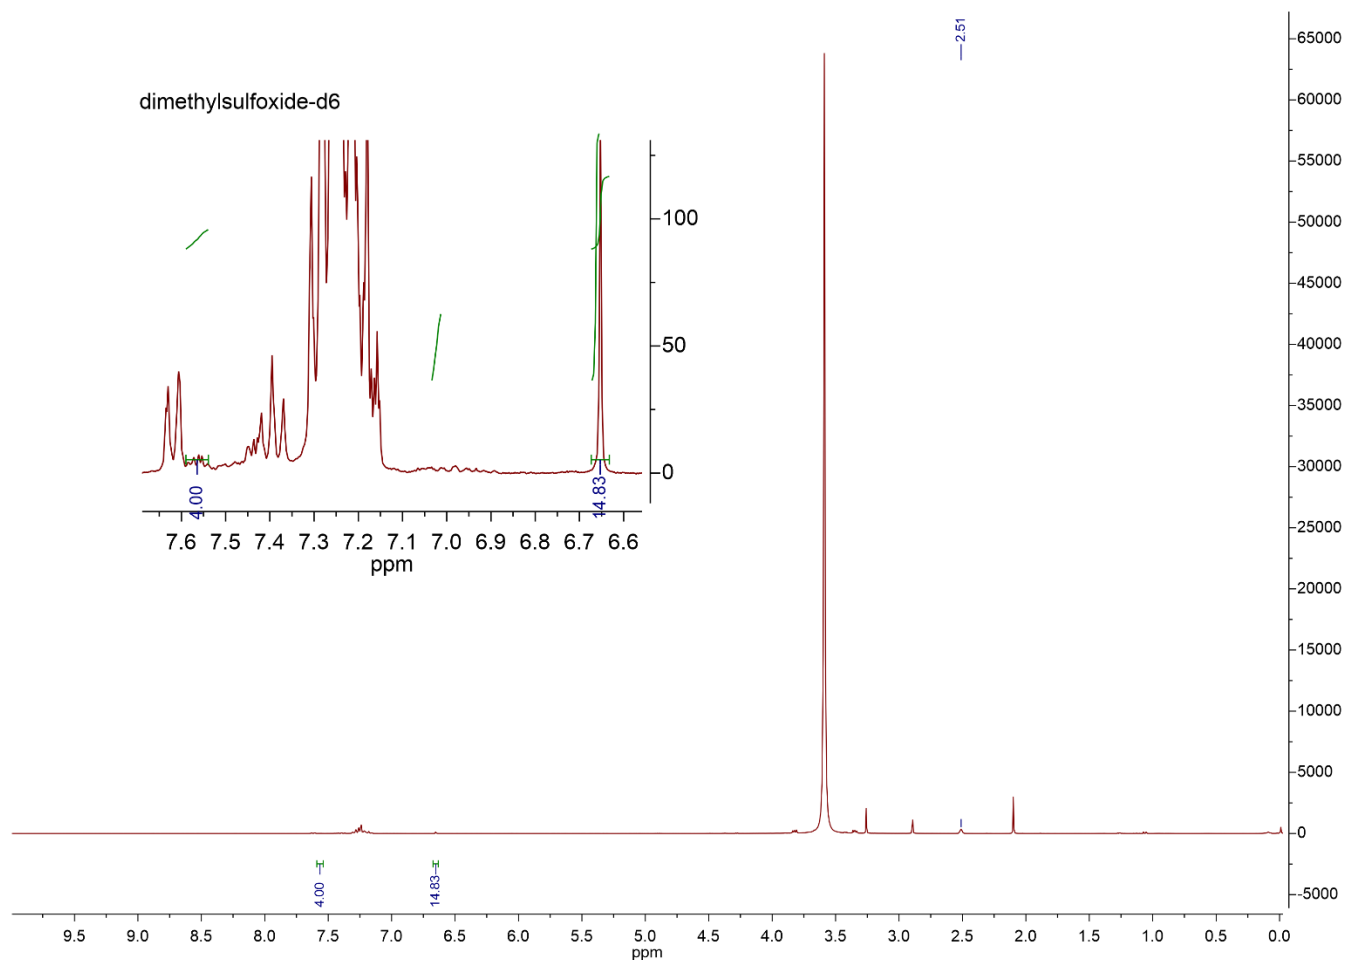

**Figure S73.**  $^1\text{H}$  NMR spectrum of the reaction mixture after hydrogenation in the second FFF module of the PA6-CF flow reactor system.
